# Supplementary material for: Specialty choice in times of economic crisis: a cross-sectional survey of Spanish medical students
Source: PubMed Central journal article supplement — BMJ Open. 2013 Feb 9;3(2):e002051. doi: 10.1136/bmjopen-2012-002051 (PMC3586052; doi:10.1136/bmjopen-2012-002051), 2013-02-09
Supplement: bmjopen-2012-002051.draft_revisions.pdf [file bmjopen-2012-002051.draft_revisions.pdf]

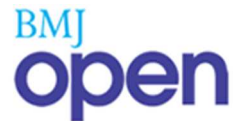

**Specialty choice in times of economic crisis: cross-sectional survey of Spanish medical students**

|                                 |                                                                                                                                                                                                                                                                                                                                                                                                                                                                |
|---------------------------------|----------------------------------------------------------------------------------------------------------------------------------------------------------------------------------------------------------------------------------------------------------------------------------------------------------------------------------------------------------------------------------------------------------------------------------------------------------------|
| Journal:                        | <i>BMJ Open</i>                                                                                                                                                                                                                                                                                                                                                                                                                                                |
| Manuscript ID:                  | bmjopen-2012-002051                                                                                                                                                                                                                                                                                                                                                                                                                                            |
| Article Type:                   | Research                                                                                                                                                                                                                                                                                                                                                                                                                                                       |
| Date Submitted by the Author:   | 03-Sep-2012                                                                                                                                                                                                                                                                                                                                                                                                                                                    |
| Complete List of Authors:       | Harris, Jeffrey; Massachusetts Institute of Technology, Economics; Blackstone Valley Community Health Care, López-Valcárcel, Beatriz; Universidad de Las Palmas de Gran Canaria, Departamento de Métodos Cuantitativos en Economía y Gestión Rubio, Vicente; Universitat Pompeu Fabra, Facultad de Ciencias Económicas y Empresariales Pérez, Patricia; Universidad de Las Palmas de Gran Canaria, Departamento de Métodos Cuantitativos en Economía y Gestión |
| <b>Primary Subject Heading</b>: | Medical education and training                                                                                                                                                                                                                                                                                                                                                                                                                                 |
| Secondary Subject Heading:      | Public health, Health policy                                                                                                                                                                                                                                                                                                                                                                                                                                   |
| Keywords:                       | MEDICAL EDUCATION & TRAINING, PRIMARY CARE, Health policy < HEALTH SERVICES ADMINISTRATION & MANAGEMENT                                                                                                                                                                                                                                                                                                                                                        |
|                                 |                                                                                                                                                                                                                                                                                                                                                                                                                                                                |

SCHOLARONE™  
Manuscripts

Specialty choice in times of economic crisis

1  
2  
3  
4  
5  
6  
7  
8  
9  
10  
11  
12  
13  
14  
15  
16  
17  
18  
19  
20  
21  
22  
23  
24  
25  
26  
27  
28  
29  
30  
31  
32  
33  
34  
35  
36  
37  
38  
39  
40  
41  
42  
43  
44  
45  
46  
47  
48  
49  
50  
51  
52  
53  
54  
55  
56  
57  
58  
59  
60

## Specialty choice in times of economic crisis: cross-sectional survey of Spanish medical students

Jeffrey E. Harris\*

Professor, Department of Economics  
Massachusetts Institute of Technology, Cambridge, Massachusetts MA 02139, USA

Beatriz González López-Valcárcel

Profesora, Departamento de Métodos Cuantitativos en Economía y Gestión  
Universidad de Las Palmas de Gran Canaria, Las Palmas de Gran Canaria 35017, Spain

Vicente Ortún Rubio

Decano, Facultad de Ciencias Económicas y Empresariales,  
Universitat Pompeu Fabra, Barcelona 08002, Spain

Patricia Barber Pérez

Profesora, Departamento de Métodos Cuantitativos en Economía y Gestión  
Universidad de Las Palmas de Gran Canaria, Las Palmas de Gran Canaria 35017, Spain

\*Corresponding author: [jeffrey@mit.edu](mailto:jeffrey@mit.edu)

Specialty choice in times of economic crisis

## Abstract

**Objective.** To investigate the determinants of specialty choice among graduating medical students in Spain.

**Setting.** Since 2008, when Spain entered into a severe, ongoing economic crisis, the percentage of Spanish medical school graduates electing Family and Community Medicine (FCM) has experienced a reversal after more than a decade of decline.

**Design.** Nationwide cross-sectional survey of all Spanish medical schools in April 2011.

**Participants.** 978 responding medical students in their last year before graduation.

**Main outcome measures.** Respondents' preferred specialty in relation to: (1) the probability of obtaining employment; (2) lifestyle and work hours; (3) recognition by patients; (4) prestige among colleagues; (5) opportunity for professional development; (6) annual remuneration; and (7) the proportion of the physician's compensation from private practice.

**Results.** Job security had the largest impact on specialty preference. Each 10-percent increment in the probability of obtaining employment increased the odds of preferring a specialty by 33.7 percent (95% CI, 27.2% – 40.5%). Job security was 4 times as important as compensation from private practice in determining specialty choice (95% CI, 1.7–6.8). We observed considerable heterogeneity in the influence of life style and work hours, with students who preferred such specialties as Cardiovascular Surgery and Obstetrics & Gynecology valuing longer, rather than shorter workdays.

**Conclusions.** In the midst of an ongoing economic crisis, job security has assumed critical importance as a determinant of specialty preference among Spanish medical students. Public policies that take advantage of the enhanced perceived job security of FCM may help steer medical school graduates into this specialty.

Specialty choice in times of economic crisis

## Introduction

During the past two decades, researchers have carried out numerous studies of the determinants of specialty choice.<sup>1-28</sup> While most have been conducted in the United States,<sup>1-13 16 18 19 22 24 26</sup> others have addressed the determinants of specialization in Canada,<sup>14 17 21 23</sup> Australia,<sup>15 25</sup> the United Kingdom,<sup>20 27</sup> and Japan.<sup>28</sup> In view of growing concerns about a shortage of generalists, many studies have focused on the decision to seek a career in primary care,<sup>2 4-6 18 26</sup> family medicine,<sup>14</sup> general practice,<sup>15 20 25</sup> internal medicine,<sup>22 24</sup> and general surgery.<sup>9 13 16 19 23</sup>

An extensive list of factors influencing specialty choice has been considered, including: financial remuneration,<sup>1-6 8-15 17 19 24 25</sup> life style and work hours,<sup>1 2 4-16 19 21-25</sup> prestige among colleagues or the general public,<sup>1-5 9 10 13-15 19 26</sup> mentors and other role models,<sup>1 5 7 15 16 18 19 21 23</sup> the length of the residency training program,<sup>1 3 5 12 13 15 16</sup> the clinical clerkship experience in medical school,<sup>1 5 13 15 16 19 21 22 26</sup> direct patient interaction and continuity of care,<sup>2-4 9 10 13 24 25</sup> debt upon graduation,<sup>5 6 8 13 15 16 22 26</sup> research and teaching opportunities,<sup>2 5 10 14 15 25</sup> potential for career advancement,<sup>13 15</sup> influence of parents, relatives and peers,<sup>4 5 15</sup> malpractice litigation risk,<sup>8 9 15</sup> opportunity to perform procedures or work with new technology,<sup>2 5 15 21 23</sup> intellectual challenge,<sup>7 9</sup> and hospital versus ambulatory orientation.<sup>2 23</sup> Gender differences in the importance of these factors have also been studied.<sup>8 19-21 28</sup> In the one study that considered job security, no significant effect was found.<sup>9</sup>

In the present study, we examine the determinants of specialty choice in Spain while the country remains in the midst of a severe financial crisis that began in late 2007. In a 2011 cross-sectional survey of medical students in their final year before electing a specialty training program, we confirm the importance of such factors as prestige, opportunity for professional

Specialty choice in times of economic crisis

development, and private sector remuneration. But we also find that job security has assumed a key role in determining specialty preference.

### **Spain's Healthcare System and the Financial Crisis**

The Spanish healthcare system is dominated by the public sector. In 2009, total healthcare expenditures constituted 9.5% of GDP, of which only 2.5% was privately financed. The vast majority of physicians are employees of the public sector, where salaries are fixed by separate negotiations between unions of healthcare workers and the governments of each of Spain's 17 autonomous communities. Physicians in many specialties have opportunities to earn additional income in the private sector, either in their own consultancies or via on-call coverage (termed guardias) at private hospitals. However, such opportunities are not available for specialists in Family and Community Medicine (FCM), who work almost exclusively as full-time employees of health centers.

Medical specialization in Spain is governed by a system widely known as MIR, which stands for Médico Interno Residente, literally "resident medical intern."<sup>29 30</sup> On an annual basis, the central government's Ministry of Health authorizes post-graduate training programs in 47 different specialties, imposing limits on the number of positions (plazas) in each program. Each medical school graduate (candidato) seeking a training position is ranked on the basis of his academic transcript and his score on the annual nationwide MIR examination. In a sequential process, the top-ranked applicant first chooses from all available training programs, after which each successively ranked candidate is permitted to choose from the remaining available training slots. In the 2011 MIR cycle, for example, the Ministry of Health authorized 6,881 positions in

Specialty choice in times of economic crisis

1  
2  
3 560 training centers throughout the country.<sup>31</sup> A total of 6,873 applicants accepted training  
4  
5  
6 positions through the sequential selection process.  
7

8 Unemployment among graduates of Spanish medical schools was a relatively rare  
9  
10 phenomenon until the financial crisis erupted in late 2007. The healthcare sector was not immune  
11  
12 from increasingly severe governmental budgetary cutbacks in the ensuing years. By February  
13  
14 2010, the number of laid off physicians nationwide had for the first time crossed the  
15  
16 psychological threshold of 1,000.<sup>32</sup> In the spring of 2011, when the survey described in this  
17  
18 report was in the field, there were prominent headlines about personnel cuts in the health budgets  
19  
20 of many autonomous communities, notably Catalonia.<sup>33</sup> By April 2012, with increasing austerity  
21  
22 measures, the number of unemployed physicians had broken the 2,000 barrier.<sup>34</sup>  
23  
24  
25  
26

27 There is presumptive evidence that the financial crisis has had a significant effect on the  
28  
29 career choices of recent medical school graduates. As Figure 1 indicates, the percentage of  
30  
31 candidates participating in the annual MIR selection process who elected a training position in  
32  
33 Family and Community Medicine underwent an abrupt reversal after 2008. For the past three  
34  
35 years (2010–2012), the number of candidates electing FCM has been limited by the number of  
36  
37 available training positions, whereas during 2006–2009, some training positions in FCM  
38  
39 remained unfilled.  
40  
41  
42  
43  
44  
45

## 46 Subjects and Methods

### 48 **Cross-sectional survey**

49  
50 In April 2011, with the assistance of professors, deans and student associations, we invited all  
51  
52 students in their final year in each of the 27 medical schools of Spain to participate in a survey of  
53  
54 career preferences. Out of a total population of 3,874 registered sixth-year medical students  
55  
56  
57  
58  
59  
60

Specialty choice in times of economic crisis

1  
2  
3 nationwide, we received 978 responses (or 25%). With the exception of students at the  
4  
5 University of Las Palmas de Gran Canaria, who took the electronic survey as a classroom-based  
6  
7 pilot, all respondents completed the survey online. The response rate varied among medical  
8  
9 schools, but there were no significant differences in the gender or age composition of the  
10  
11 respondents and the entire nationwide population (survey respondents: 71% female, mean age  
12  
13 24.1 years; nationwide population of sixth-year students: 71% female, mean age 24.7 years).  
14  
15 Participation in the survey was voluntary, and anonymity was assured. A brief description of the  
16  
17 survey methods, along with some preliminary tabulations, have been reported elsewhere.<sup>29</sup>  
18  
19  
20  
21  
22  
23

### 24 25 **Survey questionnaire**

26  
27 The electronic survey questionnaire contained three blocks: (1) personal data (age, sex,  
28  
29 nationality, residential postal code, university, anticipated date of graduation, and how many  
30  
31 parents or grandparents were physicians); (2) questions eliciting preferences among the 47  
32  
33 specialties in Spain's MIR system of postgraduate training; and (3) questions eliciting  
34  
35 perceptions and expectations concerning these specialties.  
36  
37  
38

39 In the second block, in particular, each student was first asked to designate his *preferred*  
40  
41 *specialty*, that is, which specialty he would choose in the annual MIR selection process if he  
42  
43 faced no restrictions as a result of his academic performance or his score on the nationwide  
44  
45 exam. Each student was then asked to designate his *favorite specialty*, that is, which specialty he  
46  
47 enjoyed the most, without regard to remuneration or working conditions (“Sin tener en cuenta los  
48  
49 aspectos económicos, condiciones laborales, etc., ¿cuál es la especialidad que más te gusta?”).  
50  
51 Among the 978 medical students responding to the survey, 892 (91.2%) designated a preferred  
52  
53 specialty, of whom 836 (93.7%) also designated a favorite specialty.  
54  
55  
56  
57  
58  
59  
60

Specialty choice in times of economic crisis

1  
2  
3 In the third block, each student was presented with seven questions concerning each  
4 specialty within a limited menu of six specialties. The menu included the preferred specialty he  
5 had just chosen in the second block, the specialty of Family and Community Medicine, and four  
6 other specialties chosen at random from four balanced subsets. Each subset contained medical,  
7 surgical and diagnostic specialties, with one specialty in each quartile of the global ranking of  
8 specialties observed in the MIR 2010 selection cycle.<sup>29</sup>

9  
10  
11  
12  
13  
14  
15  
16  
17  
18 The seven questions addressed the following attributes of each specialty: (1) the  
19 probability of obtaining employment; (2) lifestyle and work hours; (3) recognition by patients;  
20 (4) prestige among colleagues; (5) opportunity for professional development; (6) annual  
21 remuneration for a physician with 10–15 years experience; and (7) the proportion of the  
22 physician's compensation from private practice. Four of the attributes (2, 3, 4 and 5) were  
23 measured on a 10-point scale, while two (1 and 7) were gauged on a percentage scale from 0 to  
24 100. The remaining attribute (6) was measured in thousands of euros. The translated text of each  
25 question, along the corresponding sample means and standard deviations of students' responses  
26 for FCM and for all remaining specialties combined, are given in Table 2. For all seven  
27 attributes, the differences in the mean ratings between FCM and other specialties combined were  
28 statistically significant ( $P < 0.001$ ).

### 29 30 31 32 33 34 35 36 37 38 39 40 41 42 43 44 45 46 **Statistical methods**

47  
48 We employed the mixed multinomial logit model<sup>35</sup> to assess the influence of each of the seven  
49 attributes on students' choice of preferred specialty. The mixed multinomial logit model differs  
50 from the standard multinomial logit model in that the coefficients of each predictor variable may  
51 vary randomly in the population. In the context of discrete choice modeling, the mixed  
52  
53  
54  
55  
56  
57  
58  
59  
60



Specialty choice in times of economic crisis

1  
2  
3 multinomial logit model captures the potential heterogeneity of individual preferences. For  
4  
5 example, in the case of attribute 2, the mixed model admits the possibility that some students  
6  
7 prefer a specialty with reduced work hours and a comfortable life style, while others prefer a  
8  
9 specialty with long work hours and little leisure time.  
10  
11

12  
13 In our application of the mixed multinomial logit model, the observations corresponded  
14  
15 to the six specialties within the menus evaluated by each of the student respondents. For each  
16  
17 student, the dependent variable was a binary indicator equal to 1 for the preferred specialty and 0  
18  
19 for the remaining five specialties in the student's menu. The independent variables were each  
20  
21 student's valuations of the seven attributes. In addition, we included interaction terms between  
22  
23 each of the seven attributes and each personal characteristic in order to test whether the  
24  
25 coefficients of the attributes differed by sex, age, university, expected graduation date, or the  
26  
27 presence of physicians in the family. We also tested interactions between each attribute and a  
28  
29 binary variable indicating concordance between the student's preferred and favorite specialty.  
30  
31  
32  
33

34 Adhering to the mixed logit specification, we further assumed that the coefficients of  
35  
36 each attribute were normally distributed in the population with unknown mean and standard  
37  
38 deviation. To assess whether there was significant heterogeneity in the coefficients of each  
39  
40 attribute, apart from those differences attributable to the foregoing observed personal  
41  
42 characteristics, we tested the null hypothesis that the estimated standard deviation of each  
43  
44 coefficient's population distribution was equal to zero. We employed the chi-squared test based  
45  
46 on the log likelihood ratio to assess the overall model goodness of fit.  
47  
48  
49

50 To estimate our mixed multinomial logit model, we relied on the *mixlogit* routine in Stata  
51  
52 11 statistical software.<sup>36</sup> Each raw coefficient outputted by this routine corresponds to the effect  
53  
54 of a unit change in each attribute on the logarithm of the odds of preferring a specialty. Each raw  
55  
56  
57  
58  
59  
60

Specialty choice in times of economic crisis

1  
2  
3 coefficient can also be interpreted as the contribution of a unit change in each attribute to the  
4  
5 “utility” of the specialty. In the tabulated results below, we report the exponentiated values of the  
6  
7 raw coefficients, that is, the effect of a unit change on the odds of specialty preference. However,  
8  
9 we used the raw coefficients to assess the quantitative tradeoffs between attributes. For example,  
10  
11 to estimate the percentage increase in the proportion of the physician’s compensation from  
12  
13 private practice (attribute 7) that would yield the same utility as a 1-percent increase in the  
14  
15 probability of obtaining employment (attribute 1), we computed the ratio of the raw coefficient  
16  
17 of attribute 1 to the raw coefficient of attribute 7.  
18  
19

20  
21  
22 Finally, to assess the external validity of our mixed multinomial logit model, we  
23  
24 compared its predictions of specialty choice with the global ranking of specialties observed  
25  
26 among the same nationwide cohort of medical graduates in the 2012 MIR selection process. We  
27  
28 chose the 2012 MIR cycle for comparison because the students responding to our April 2011  
29  
30 survey subsequently graduated from medical school in June 2011, then studied for and took the  
31  
32 MIR exam in January 2012, and then made their specialty selections during March of that year.  
33  
34 Specifically, for each specialty within each student’s menu, we computed the predicted  
35  
36 probability that the student would prefer that specialty. For each specialty, we then compared its  
37  
38 median predicted probability, as derived from our model, with its median ranking among all  
39  
40 candidates who elected a specialty in the 2012 MIR cycle.  
41  
42  
43  
44  
45  
46  
47

## 48 Results

### 51 Predictors of Specialty Preference

52  
53 Table 2 gives the principal results of our regression analyses. Model 1 represents the standard  
54  
55 multinomial logit regression, in which all attribute coefficients are fixed, while Models 2 through  
56  
57  
58  
59  
60

Specialty choice in times of economic crisis

1  
2  
3 4 represent mixed multinomial logit regressions. In Model 2, in particular, the coefficient of  
4  
5 attribute 2 (lifestyle and work hours) is permitted to vary within the population. In Model 3,  
6  
7 interaction terms with attribute 6 (annual remuneration with 10–15 years' experience) are  
8  
9 included as explanatory variables. In Model 4, attribute 6 and its interactions are removed  
10  
11 altogether.  
12  
13

14  
15 In all model specifications in Table 2, attribute 1 (the probability of obtaining  
16  
17 employment) significantly influenced specialty preference. In Model 4, for example, each 10-  
18  
19 percent increment in the probability of obtaining employment increased the odds of preferring a  
20  
21 specialty by 33.7 percent (95% confidence interval (CI), 27.2% – 40.5%). The magnitude of the  
22  
23 effect was comparable to that of attribute 5 (professional development, including the possibility  
24  
25 of promotion). Attributes 3 (recognition by patients) and 4 (prestige among colleagues) had  
26  
27 smaller but significantly positive influences on specialty choice. For both attributes, a 1-point  
28  
29 increment on a 10-point scale increased the odds of preferring a specialty by approximately 10–  
30  
31 11 percent.  
32  
33  
34  
35  
36  
37  
38

### 39 *Heterogeneity of Preferences for Life Style and Work Hours*

40  
41 Although attribute 2 (life style and work hours) appeared to have a significant negative influence  
42  
43 on specialty choice, our mixed multinomial logit Models 2, 3 and 4 revealed considerable  
44  
45 population heterogeneity in this effect. In Model 4, for example, the population average effect  
46  
47 was 0.907, with a 1-standard deviation range from 0.606 to 1.208 (that is,  $0.907 \pm 0.301$ ).  
48  
49 Equivalently, a 1-point increment on a 10-point scale reduced the odds of preferring a specialty  
50  
51 *on average* by an estimated 9.3 percent. However, for 68 percent of the students (which  
52  
53 corresponds to the 1-standard deviation range for a normal distribution), the effect of a 1-point  
54  
55  
56  
57  
58  
59  
60

Specialty choice in times of economic crisis

1  
2  
3 increment ranged from a 39.4 percent decrease to a 20.8 percent increase in the odds of  
4  
5 preferring a specialty. Attribute 2 was the only explanatory variable to show significant  
6  
7 population heterogeneity in our mixed multinomial logit regressions.  
8  
9

10  
11 Figure 2 offers a visual representation of the population heterogeneity in the influence of  
12  
13 lifestyle and work hours. To construct the figure, we used the results of Model 4 to compute the  
14  
15 predicted effect for each individual student of a 1-point increment in attribute 2. Each open point  
16  
17 in the figure represents one student. The points are arranged in rows corresponding to the  
18  
19 student's preferred specialty. The horizontal axis gauges the predicted effect of a 1-point  
20  
21 increment a 10-point scale of favorable lifestyle and work hours. The solid blue squares  
22  
23 represent the population mean effect for each preferred specialty. Among the 887 students  
24  
25 included in Model 4, a total of 231 (or 26 percent) had a positive predicted effect of lifestyle and  
26  
27 work hours on specialty preference.  
28  
29  
30

31  
32 Figure 2 displays considerable heterogeneity between preferred specialties. For example,  
33  
34 among the group of 53 students preferring Dermatology, whose predicted effects are arrayed in  
35  
36 the second row in Figure 2, the average effect of a 1-point increment a 10-point scale of  
37  
38 favorable lifestyle and work hours was a 7.6-percent increase in the odds of preferring that  
39  
40 specialty. Within this group, the predicted effect ranged from a 12.5-percent decrease to a 29.9-  
41  
42 percent increase. For the 35 students preferring Family and Community Medicine, arrayed on the  
43  
44 third row, the average effect of a 1-point increment along the scale of lifestyle and work hours  
45  
46 was a 4.1-percent increase in the odds of specialty preference, with a predicted effect ranging  
47  
48 from a 26.4-percent decrease to a 33.6-percent increase. By contrast, among the group of 73  
49  
50 students preferring Obstetrics & Gynecology, whose predicted effects are arrayed in the next-to-  
51  
52 last row of the figure, the average effect of a 1-point increment was an 18.5 percent decrease in  
53  
54  
55  
56  
57  
58  
59  
60

Specialty choice in times of economic crisis

1  
2  
3 the odds of preferring that specialty. Within this group, the predicted effect ranged from a 34.6-  
4  
5 percent decrease to a 13.7-percent increase.  
6  
7  
8  
9

### 10 *Concordance between Preferred and Favorite Specialties*

11  
12 Among the 892 students who reported both a preferred and a favorite specialty, we observed a  
13  
14 concordance between the two responses in 676 students (or 75.8%). Figure 3 shows the rate of  
15  
16 concordance, classified by preferred specialty. The rate of concordance ranged from a low of  
17  
18 53.8 percent among students who preferred Cardiovascular Surgery to 90.9 percent among those  
19  
20 who preferred Intensive Care Medicine. The rate of concordance for Family and Community  
21  
22 Medicine was 85.7 percent.  
23  
24  
25  
26  
27  
28

### 29 *Opportunities for Private Sector Remuneration*

30  
31 In Models 1 and 2 in Table 2, attribute 6 (annual remuneration with 10–15 years experience) had  
32  
33 a significant negative influence on specialty preference, while attribute 7 (proportion of  
34  
35 compensation from private practice) had a significant positive effect. To address the apparent  
36  
37 inconsistency between the estimated effects of the two different attributes, we included  
38  
39 interaction terms with attribute 6 in our specification of Model 3. We found that the negative  
40  
41 relation between annual remuneration and specialty preference remained statistically significant  
42  
43 for female students and for those who reported a concordance of preferred and favorite specialty.  
44  
45  
46  
47 There was no relationship between the effect of annual remuneration and a student's age.  
48  
49

50  
51 Finally, in Model 4, when we dropped attribute 6 altogether, the effect of attribute 7  
52  
53 remained significant and positive, but its magnitude was decreased. With annual remuneration  
54  
55 included as an explanatory variable, each 10-percent increment in the proportion of  
56  
57  
58  
59  
60

Specialty choice in times of economic crisis

1  
2  
3 compensation from private practice increased the odds of preferring a specialty by approximately  
4  
5 20–22 percent. With annual remuneration excluded, the effect of 10-percent increment in the  
6  
7 proportion of compensation from private practice compensation increased the odds of specialty  
8  
9 preference by only 7 percent.  
10  
11

### 12 13 14 15 *Tradeoff between Job Security and Opportunities for Private Sector Remuneration*

16  
17 We focused specifically on the quantitative tradeoff between job security (attribute 1) and  
18  
19 opportunities for private sector remuneration (attribute 7). Relying on the results of Model 4, we  
20  
21 found that the raw coefficients of attributes 1 and 7 were, respectively, 0.290 (95% CI, 0.241–  
22  
23 0.340) and 0.069 (95% CI, 0.028–0.110). The percentage increase in the proportion of the  
24  
25 physician's compensation from private practice (attribute 7) that would yield the same utility as  
26  
27 a 1-percent increase in the probability of obtaining employment (attribute 1) was therefore  
28  
29  $0.290 \div 0.069 = 4.2$ . Based on a linear approximation of the variance of the ratio of two random  
30  
31 variables, we computed the 95% confidence interval around this estimate as 1.7–6.8.  
32  
33  
34  
35  
36  
37  
38

### 39 **External Validity: Comparison with MIR 2012 Global Rankings**

40  
41 For all four models, the chi-squared statistic based on the log likelihood ratio showed a  
42  
43 significant goodness of fit ( $P < 0.002$ ). As a further check of internal validity, we found a close  
44  
45 match between the observed and predicted probabilities of specialty choice when broken down  
46  
47 by decile of predicted probability.<sup>37</sup>  
48  
49

50  
51 Figure 4 displays a check of external validity. For each specialty, the figure plots median  
52  
53 predicted probability of specialty preference against the median specialty ranking in the 2012  
54  
55 MIR cycle. The latter variable is plotted on a reverse scale since the most preferred specialties in  
56  
57  
58  
59  
60

Specialty choice in times of economic crisis

1  
2  
3 the MIR selection process will have the lowest ranking numbers. Also plotted is the ordinary  
4  
5 least squares regression line relating the two variables. The Spearman rank correlation between  
6  
7 the two variables was  $-0.88$  and highly significant ( $P < 0.0001$ ).  
8  
9

10 The strong correlation between the model predictions and the MIR rankings can be seen  
11  
12 through a comparison of Cardiology at the upper right, Anesthesiology near the center, and  
13  
14 Family and Community Medicine (FCM) near the bottom left. Thus, among the 6,704 candidates  
15  
16 nationwide who elected a specialty during the 2012 MIR selection process, the median ranking  
17  
18 of those candidates choosing Cardiology was 555. (Only two specialties had a higher median  
19  
20 ranking: Plastic Surgery at 136, and Dermatology at 404.) From a menu of six specialties offered  
21  
22 to students participating in our survey, the median predicted probability of preferring Cardiology  
23  
24 was 29.6 percent. For Anesthesiology, by contrast, the median ranking in the 2012 MIR cycle  
25  
26 was 2,652, while the median predicted probability among survey respondents was 16.3 percent.  
27  
28 For Family and Community Medicine, the median ranking in the 2012 MIR cycle was 5,552,  
29  
30 while the median predicted probability among survey respondents was 9.2 percent.  
31  
32  
33  
34  
35  
36  
37  
38

## 39 Discussion

40  
41 In a cross-sectional survey of medical students in their final year before graduation, conducted in  
42  
43 the midst of Spain's economic crisis, we found that job security had significant impact on the  
44  
45 specialty preference. Based upon our Model 4 specification, we found that each 10-percent  
46  
47 increment in the probability of obtaining employment increased the odds of preferring a specialty  
48  
49 by 33.7 percent (95% CI, 27.2% – 40.5%). Moreover, we observed considerable variability in the  
50  
51 effect of lifestyle and work hours on students' specialty preferences. Among students who would  
52  
53 elect Dermatology if there were no restrictions on specialty choice, the average effect of a 1-  
54  
55  
56  
57  
58  
59  
60

Specialty choice in times of economic crisis

1  
2  
3 point increment a 10-point scale of favorable lifestyle and work hours was a 7.6-percent increase  
4  
5 in the odds of preferring that specialty. By contrast, among students preferring Obstetrics &  
6  
7 Gynecology, the average effect of a 1-point increment was an 18.5 percent decrease in the odds  
8  
9 of preferring that specialty.  
10  
11

12 We also asked students to designate their favorite specialty, that is, the specialty that they  
13  
14 enjoyed the most, independent of future remuneration or working conditions. The concordance  
15  
16 between students' preferred and favorite specialties varied considerably. Approximately 54  
17  
18 percent of students who preferred Cardiovascular Surgery also designated it as their favorite  
19  
20 specialty. By contrast, approximately 86 percent of students who preferred Family and  
21  
22 Community Medicine also designated it as their favorite specialty, while 91 percent of students  
23  
24 who preferred Intensive Care Medicine also designated it as their favorite specialty.  
25  
26  
27  
28

29 Our survey included two attributes that reflected different aspects of physician  
30  
31 compensation: the average remuneration of a physician with 10–15 years experience, and the  
32  
33 proportion of compensation from private practice. We found that the former had an unexpectedly  
34  
35 negative relation to specialty preference, particularly among female students and those favorite  
36  
37 specialty matched their preferred specialty, while the latter had a significant positive relation to  
38  
39 specialty preference (Model 3). Eliminating the former from our regression analysis (Model 4),  
40  
41 we estimated the tradeoff between job security and opportunities for private practice. An increase  
42  
43 of approximately 4 percent in the proportion of the physician's compensation from private  
44  
45 practice would yield the same utility as a 1-percent increase in the probability of obtaining  
46  
47 employment.  
48  
49  
50  
51  
52

53 Finally, as an external validity check, we found a high correlation between the specialty  
54  
55 ranking predicted by our mixed multinomial logit model with the nationwide specialty ranking in  
56  
57  
58  
59  
60



Specialty choice in times of economic crisis

1  
2  
3 the 2012 MIR selection process. In particular, the median probability that a student would select  
4  
5 Family & Community Medicine out of a menu of six specialty choices was approximately 9  
6  
7 percent, while the median MIR ranking of this specialty was 5,552 out of 6,704 candidates.  
8  
9

### 10 11 12 13 **Study Limitations**

14  
15 Our study has a number of important limitations. To begin with, we surveyed students only once  
16  
17 in April 2011. We have no data from a comparable cross-sectional survey carried out before the  
18  
19 onset of Spain's economic crisis in late 2007. Further confirmation of the lasting importance of  
20  
21 job security in specialty choice will require repeat surveys once employment prospects for  
22  
23 physicians have improved.  
24  
25

26  
27 Nor do we report longitudinal follow-up data on the evolution of our respondents'  
28  
29 specialty preferences over time. There is evidence from longitudinal studies that students'  
30  
31 specialty preferences evolve during medical school.<sup>38 39</sup> In a study of internal medicine residents  
32  
33 in the United States, 62 percent changed the subspecialty career choice at least once during  
34  
35 residency.<sup>40</sup> In a longitudinal follow-up of U.K. medical graduates 10 years after graduation,  
36  
37 approximately one-quarter were working in a specialty different from that chosen 3 years after  
38  
39 graduation.<sup>27</sup> It is notable, however, that 91.2% of students that we surveyed reported a preferred  
40  
41 specialty, whereas in the United Kingdom, 28% of medical school graduates in the 1990s knew  
42  
43 their preferred specialty one year after graduation.<sup>27</sup> The high correlation between specialty  
44  
45 choice predicted by our model and specialty choices observed in the MIR 2012 cycle (Figure 3)  
46  
47 does not suggest a marked shift in preferences during the one-year period after medical school  
48  
49 graduation, during which prospective candidates study for the national exam and then participate  
50  
51 in the sequential selection process.  
52  
53  
54  
55  
56  
57  
58  
59  
60

Specialty choice in times of economic crisis

1  
2  
3 The explanatory variables in our model (Table 1) were derived from students'  
4 perceptions and expectations, rather than objective data. It is entirely possible, for example, that  
5 students exaggerated the importance of job security (attribute 1). By April 2012, with Spain's  
6 overall unemployment rate hovering around 25%, the psychologically menacing figure of 2,000  
7 unemployed doctors<sup>41</sup> still represented only 1 percent of the active physician workforce. While a  
8 few studies have correlated specialty preferences with objective data on remuneration, work  
9 hours, malpractice risk, and debt upon graduation,<sup>8 12</sup> we stress that students' subjective  
10 perceptions and expectations are the principal determinants of specialty choice.  
11  
12

13  
14 While a number of studies have focused on the "controllable lifestyle" as an important  
15 determinant of specialty choice,<sup>1 2 4-16 19 21-25</sup> our results shed new light on the heterogeneity of  
16 preferences for lifestyle and work hours. We find, in fact, that only 26 percent of respondents  
17 placed a positive value on reduced work hours, while 74 percent placed a positive value on  
18 working more (Figure 2). One possible explanation is that, in a healthcare system where public-  
19 sector salaries are fixed by collective bargaining, taking on additional on-call assignments after  
20 regular working hours is viewed primarily as a means of increasing remuneration. In the  
21 EuroStat Labor Force Surveys, Spanish physicians reported working an average of 39 hours per  
22 week,<sup>42</sup> even though the collectively agreed-upon formal work week was 35 hours.  
23  
24  
25  
26  
27  
28  
29  
30  
31  
32  
33  
34  
35  
36  
37  
38  
39  
40  
41  
42

43 Our failure to find a significant positive effect of annual remuneration (attribute 6) may  
44 reflect students' inadequate knowledge of physicians' salaries, a phenomenon that has also been  
45 observed in the U.S.<sup>43</sup> It is possible that students' estimates of remuneration were overly  
46 influenced by short-term concerns about job security, even though the underlying question was  
47 framed over a 10–15 year horizon. Nationally representative data on the earnings of Spanish  
48 physicians have not been published. Students' estimates of the annual remuneration of a non-  
49  
50  
51  
52  
53  
54  
55  
56  
57  
58  
59  
60

Specialty choice in times of economic crisis

1  
2  
3 FCM specialist were on average 44% greater than that of a practitioner of FCM (Table 1), a  
4  
5 value that falls within the range of specialist-GP remuneration ratios of other OECD countries.<sup>44</sup>  
6  
7

8 In Canada, physicians' fee-for-service payments correlate strongly with income,<sup>17</sup>  
9  
10 whereas in the United Kingdom, opportunities for non-NHS consultant work constitute an  
11  
12 important determinant of variations in income.<sup>45</sup> Our finding that attribute 7 was a significant  
13  
14 predictor of specialty choice indicates that, in Spain's healthcare system where publicly financed  
15  
16 salaries are the dominant form of physician compensation, opportunities for additional private-  
17  
18 sector employment are a more sensitive proxy for physician income. For this reason, we based  
19  
20 our calculations of the tradeoff between job security and remuneration on the results of Model 4,  
21  
22 which excludes attribute 6 entirely.  
23  
24  
25  
26

27 A few studies have employed a discrete choice experiment – rather than a cross-sectional  
28  
29 survey – to assess the determinants of physicians' choice of specialty,<sup>25</sup> working conditions,<sup>45 46</sup>  
30  
31 and urban versus rural practice.<sup>47</sup> A discrete choice experiment has the advantage that each  
32  
33 potential determinant of physician choice can be independently controlled and varied randomly.  
34  
35 In principle, such a study design might have helped us distinguish more precisely between total  
36  
37 remuneration (attribute 6) and opportunities for private sector employment (attribute 7). It might  
38  
39 also have allowed us to assess more precisely the extent to which the “workaholics” in our study,  
40  
41 who preferred specialties with more working hours (attribute 2), would trade off higher income  
42  
43 for reduced leisure time. One drawback of the discrete choice experimental design is that  
44  
45 respondents choose between hypothetical choices constructed by the experimenter, whereas in  
46  
47 our cross-sectional study, we directly observe the perceived attributes of the actual specialty  
48  
49 options available to graduating medical students. While the results of discrete choice  
50  
51  
52  
53  
54  
55  
56  
57  
58  
59  
60

Specialty choice in times of economic crisis

1  
2  
3 experiments can be used in simulations, our cross-sectional design thus facilitates external  
4  
5 validation of our results (Figure 4).  
6  
7

8 We asked students to report both their preferred and favorite specialties, a distinction we  
9  
10 have not encountered in any other study. While Spanish medical students generally report a high  
11  
12 level of concordance between the two (76%), we observed considerable variation by preferred  
13  
14 specialty (Figure 2). It is noteworthy that five of the highest ranked specialties in the 2011 MIR  
15  
16 cycle (Cardiovascular Surgery, Neurosurgery, Plastic Surgery, Cardiology and Dermatology; see  
17  
18 Figure 4) had low levels of concordance. By contrast, the observed high levels of concordance  
19  
20 for Internal Medicine and Family and Community Medicine suggest that students who prefer  
21  
22 these specialties do so despite the low salaries, minimal opportunities for private-sector  
23  
24 remuneration, or unfavorable working conditions. This conclusion is further supported by the  
25  
26 observed negative effect of the interaction between concordance and remuneration in Model 3  
27  
28 (Table 2).  
29  
30  
31  
32  
33  
34  
35

### 36 **Policy Implications**

37  
38 Increased remuneration, more favorable working conditions and enhanced prestige have  
39  
40 routinely been proposed as incentives to lure medical students into primary care and family  
41  
42 practice. In Spain, however, physician remuneration within the public sector is determined by  
43  
44 decentralized collective bargaining between unions and local governments. Opportunities for  
45  
46 primary care and family practice physicians to earn additional income in the private sector are  
47  
48 scarce and even less under the control of the central government. Improvements in working  
49  
50 conditions and enhancement of prestige are longer-term solutions that will require reformulation  
51  
52 of the nature of work of the primary care physician and the role of community health centers.<sup>29 30</sup>  
53  
54  
55  
56  
57  
58  
59  
60

Specialty choice in times of economic crisis

1  
2  
3 Our findings, by contrast, suggest other shorter-term policy levers that may take  
4  
5 advantage of the high level of perceived job security of FCM (Table 1) and thus increase the  
6  
7 flow of medical school graduates into the field. To the extent that the healthcare budgets of the  
8  
9 country's 17 autonomous communities must continue to endure budgetary cuts, our results argue  
10  
11 for sparing community health centers and the practitioners of FCM who work in them. As part of  
12  
13 its crisis management, the Spanish central government has recently increased physicians' legal  
14  
15 work week from 35 to 37.5 hours, a measure that has sparked more than a few protests.<sup>48 49</sup>  
16  
17  
18 Ironically, this measure will cut mostly into the incomes of non-FCM specialists who earned  
19  
20 additional income through after-hours guardias and thus reduce the income disparity with family  
21  
22 physicians.  
23  
24  
25

26  
27 As a separate policy instrument, the central government's Ministry of Health could  
28  
29 cautiously expand the number of approved post-graduate training positions in FCM, which has  
30  
31 recently become a limiting factor in the resurgence of this specialty since 2008 (Figure 1). There  
32  
33 is evidence that many residents already in training in FCM have chosen to retake the national  
34  
35 MIR exam and reenter the selection process as candidatos despite the requirement that they  
36  
37 abandon their current training position.<sup>29</sup> It is conceivable that too large an excess of unfilled  
38  
39 training slots in FCM could aggravate this perverse incentive.  
40  
41  
42  
43  
44  
45

## 46 **Conclusions**

47  
48 In the midst of an ongoing economic crisis, job security has assumed critical importance as a  
49  
50 determinant of specialty preference among Spanish medical students. Public policies that take  
51  
52 advantage of the enhanced perceived job security of FCM may be an effective way to steer  
53  
54 medical school graduates into this specialty.  
55  
56  
57  
58  
59  
60

Specialty choice in times of economic crisis

## Footnotes

### Contributors

All authors (JEH, BGL, VOR, PBP) contributed substantially to the conceptualization and design of the survey. JEH, BGL and PBP performed statistical analyses on the survey data. JEH and BGL wrote the initial drafts, while VOR and PBP made substantive changes to various drafts. All contributors approved the final version for publication.

### Acknowledgements

We gratefully acknowledge the research assistance of Teresa Suárez de Sousa.

### Competing Interests

All authors have completed the United Competing Interest form at [www.icmje.org/coi\\_disclosure.pdf](http://www.icmje.org/coi_disclosure.pdf) (available on request from the corresponding author) and declare that they have no competing interests.

### Funding

The Spanish Ministry of Science and Innovation, through Grant ECO2010-21558 to BGL as principal investigator, supported the development, execution and analysis of the survey described in this study.

### Copyright License

The Corresponding Author has the right to grant on behalf of all authors and does grant on behalf of all authors, an exclusive licence (or non exclusive for government employees) on a worldwide

1 Specialty choice in times of economic crisis

2  
3 basis to the BMJ Publishing Group Ltd to permit this article (if accepted) to be published in BMJ  
4  
5 editions and any other BMJ PGL products and sublicences such use and exploit all subsidiary  
6  
7 rights, as set out in our licence.  
8  
9

### 10 11 12 **Statement concerning Ethical Approval**

13  
14  
15 No ethical approval was required for this research.  
16  
17

### 18 19 20 **Data Sharing Statement**

21  
22 The detailed results of all statistical analyses, including statistical code, are available from the  
23  
24 corresponding author at [jeffrey@mit.edu](mailto:jeffrey@mit.edu).  
25  
26  
27  
28  
29  
30  
31  
32  
33  
34  
35  
36  
37  
38  
39  
40  
41  
42  
43  
44  
45  
46  
47  
48  
49  
50  
51  
52  
53  
54  
55  
56  
57  
58  
59  
60

Specialty choice in times of economic crisis

## Article Summary

### Article focus.

- Ours is the first study of the determinants of physician specialty choice in Spain, a country whose healthcare system is dominated by the public sector.
- Since 2008, when Spain entered into a severe, ongoing economic crisis, the percentage of Spanish medical school graduates electing Family and Community Medicine (FCM) has experienced a reversal after more than a decade of decline.
- In an April 2011 nationwide cross-sectional survey of graduating students from all Spanish medical schools, we focus on job security as a determinant of physician specialty choice.

### Key messages.

- We find that job security has assumed a key role in determining specialty choice.
- We confirm the importance of such factors as prestige, opportunity for professional development, and private sector remuneration.
- In contrast to prior studies, we find wide variation in the importance that Spanish medical students attach to a controllable life style and reduced work hours.

### Strengths and limitations of this study.

- Our findings suggest policy levers that may take advantage of the high level of perceived job security of Family and Community Medicine and thus increase the flow of medical school graduates into the field.
- In the present study, we do not report longitudinal follow-up data on our respondents' specialty preferences over time.



Specialty choice in times of economic crisis

Table 1. Seven survey questions on attributes of medical specialties<sup>a</sup>

|   | Attribute and Survey Text                                                                                                                                                                                                                               | FCM            | All Others     |
|---|---------------------------------------------------------------------------------------------------------------------------------------------------------------------------------------------------------------------------------------------------------|----------------|----------------|
|   |                                                                                                                                                                                                                                                         | Mean<br>S.D.   | Mean<br>S.D.   |
| 1 | <i>Probability of Obtaining Employment.</i> “How would you rate the probability of obtaining work in the next three years, whether in the public or private sector, for an individual who became certified in this specialty today? (0 to 100 percent)” | 83.98<br>19.89 | 64.78<br>23.92 |
| 2 | <i>Lifestyle &amp; Work Hours.</i> “Work hours, working conditions, and the ability to reconcile work with family life. (0 to 10, 0 = very bad, 10 = very good)”                                                                                        | 7.78<br>2.09   | 6.78<br>2.25   |
| 3 | <i>Recognition by Patients.</i> “Recognition of professional work on the part of patients. (0 to 10)”                                                                                                                                                   | 5.92<br>2.60   | 6.34<br>2.73   |
| 4 | <i>Prestige among Colleagues.</i> “Prestige and recognition among colleagues as well as social recognition. (0 to 10)”                                                                                                                                  | 3.92<br>2.28   | 6.30<br>2.52   |
| 5 | <i>Opportunity for Professional Development.</i> “Possibility of promotion or future professional development within the specialty (new fields, new techniques, scientific advances). (0 to 10)”                                                        | 5.11<br>2.30   | 7.20<br>2.15   |
| 6 | <i>Annual Remuneration with 10–15 Years Experience.</i> “Estimate the current average annual gross remuneration (public and private combined) of a specialist with 10–15 years of experience. (Thousands of euros)” <sup>b</sup>                        | 60.00<br>0.16  | 86.56<br>31.96 |
| 7 | <i>Proportion of Compensation from Private Practice.</i> “What percentage of this remuneration (including public and private) do you believe comes from private practice? (0 to 100 percent)” <sup>b</sup>                                              | 0.00<br>0.00   | 39.32<br>23.40 |

a. The introductory text was, “In this section, you’ll define your profile of some medical specialties, including the one that you’ve just chosen as your first choice as well as others chosen at random. Think about your *perceptions and expectations* concerning each specialty.”

b. The preamble to the two questions on attributes 6 and 7 was: “The following questions are about compensation. To facilitate your responses, recall that the average annual gross income of a full-time specialist in Family & Community Medicine with 10–15 years experience is currently about 60,000 euros.”

Specialty choice in times of economic crisis

Table 2. Mixed Multinomial Logit Regression Results<sup>a</sup>

| Explanatory Variable                                             | Model 1                  | Model 2                  | Model 3                  | Model 4                  |
|------------------------------------------------------------------|--------------------------|--------------------------|--------------------------|--------------------------|
| 1. Probability of Obtaining Employment <sup>b</sup>              | 1.324<br>[1.263 , 1.388] | 1.346<br>[1.278 , 1.418] | 1.339<br>[1.271 , 1.412] | 1.337<br>[1.272 , 1.405] |
| 2. Lifestyle & Work Hours                                        | 0.905<br>[0.867 , 0.944] | 0.901<br>[0.852 , 0.952] | 0.891<br>[0.843 , 0.943] | 0.907<br>[0.860 , 0.957] |
| Population Standard Deviation                                    |                          | 0.288<br>[0.161 , 0.415] | 0.282<br>[0.155 , 0.409] | 0.301<br>[0.182 , 0.419] |
| 3. Recognition by Patients                                       | 1.105<br>[1.055 , 1.157] | 1.118<br>[1.064 , 1.176] | 1.116<br>[1.061 , 1.173] | 1.098<br>[1.047 , 1.151] |
| 4. Prestige among Colleagues                                     | 1.082<br>[1.024 , 1.143] | 1.096<br>[1.033 , 1.163] | 1.110<br>[1.046 , 1.179] | 1.062<br>[1.005 , 1.121] |
| 5. Opportunity for Professional Development                      | 1.326<br>[1.254 , 1.403] | 1.347<br>[1.267 , 1.432] | 1.347<br>[1.265 , 1.433] | 1.303<br>[1.229 , 1.381] |
| 6. Annual Remuneration with 10–15 Years Experience <sup>c</sup>  | 0.821<br>[0.782 , 0.863] | 0.812<br>[0.770 , 0.856] | 1.062<br>[0.701 , 1.610] |                          |
| Interaction: Female Gender                                       |                          |                          | 0.884<br>[0.817 , 0.957] |                          |
| Interaction: Concordance with Favorite Specialty <sup>d</sup>    |                          |                          | 0.885<br>[0.815 , 0.962] |                          |
| Interaction: Age (Years)                                         |                          |                          | 0.995<br>[0.978 , 1.012] |                          |
| 7. Proportion of Compensation from Private Practice <sup>b</sup> | 1.195<br>[1.139 , 1.255] | 1.210<br>[1.148 , 1.276] | 1.218<br>[1.154 , 1.285] | 1.071<br>[1.028 , 1.116] |
| Number of respondents <sup>e</sup>                               | 836                      | 836                      | 818                      | 887                      |
| Number of observations <sup>f</sup>                              | 4,839                    | 4,839                    | 4,738                    | 5,184                    |

a. The coefficients represent the effect of a unit change in the independent variable on the odds of preferring a specialty. Numbers in brackets below each coefficient are 95% confidence intervals.

b. Attribute values normalized to range from 0 to 10, so that each unit corresponds to 10 percent.

c. Attribute values normalized so that each unit corresponds to €10,000.

d. Binary variable equal to 1 when the student's preferred specialty is also his favorite specialty.

e. Number of students with data on all explanatory variables in the model.

f. Number of specialty choices with data on all explanatory variables in the model.

Specialty choice in times of economic crisis

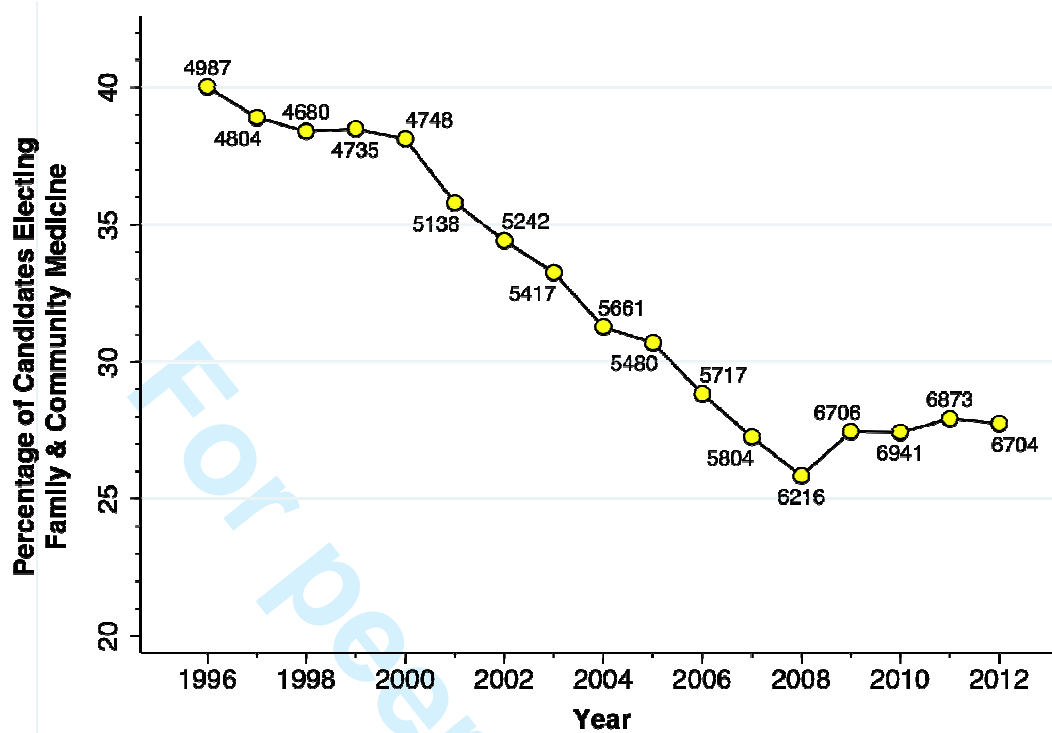

**Figure 1. Percentage of Candidates Participating in the Annual Internship-Residency (“MIR”) Selection Process Who Elected a Training Position in Family and Community Medicine, 1996–2012.** Adjacent to each point is the total number of candidates participating in the MIR selection process in the corresponding year. *Source:* Compiled from annual data provided by the Ministerio de Sanidad y Política Social, Subdirección General de Ordenación Profesional, Spain.

Specialty choice in times of economic crisis

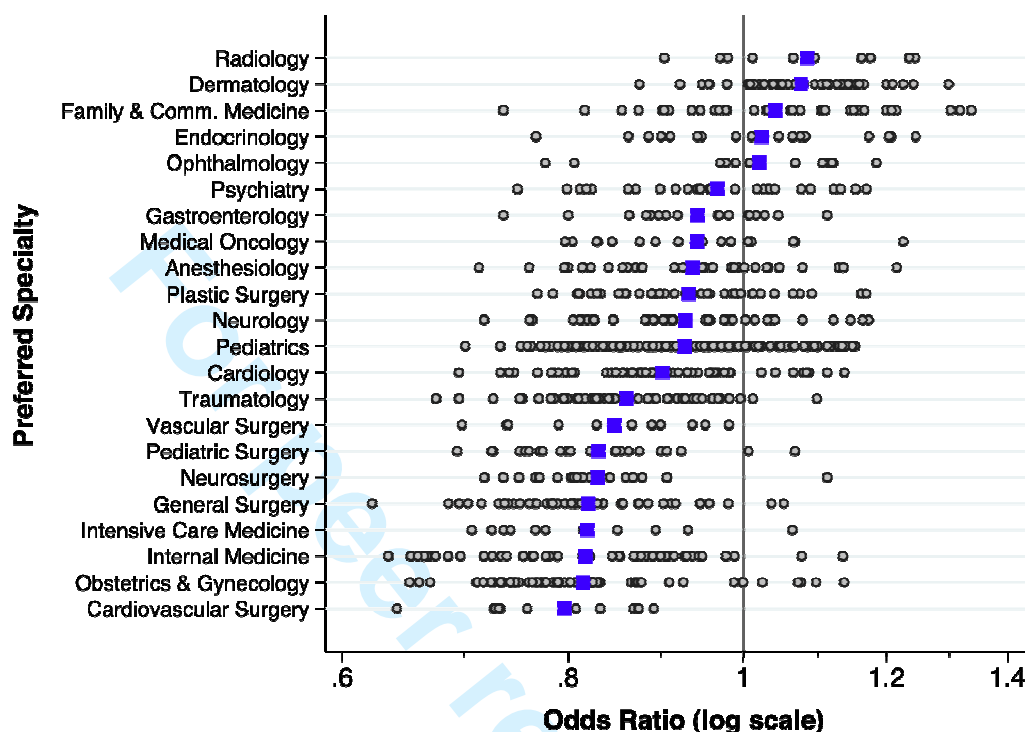

**Figure 2. Effect of a 1-point increment in *Lifestyle & Work Hours* rating on odds ratio of preferring a specialty.** Each point corresponds to an individual student. The points are classified by the student's preferred specialty. The blue squares show the mean effect for each preferred specialty. Not shown are preferred specialties with fewer than 10 respondents.

Specialty choice in times of economic crisis

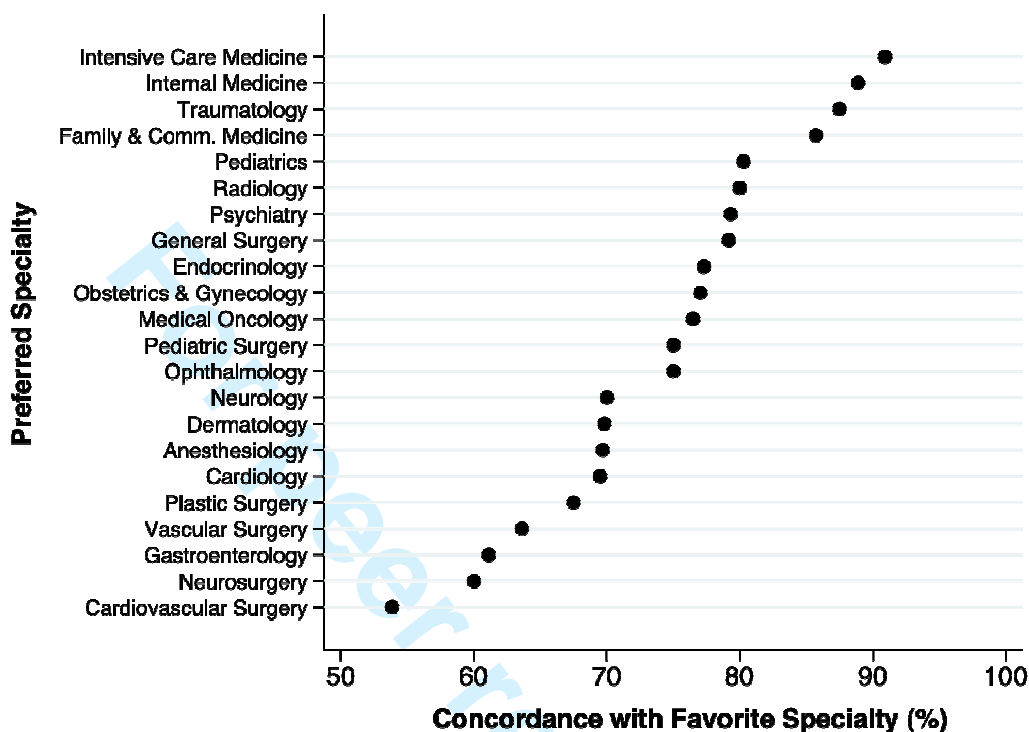

**Figure 3. Concordance of preferred with favorite specialty.** For each preferred specialty, the black points show the proportion of students who also designated that specialty as their favorite.

Specialty choice in times of economic crisis

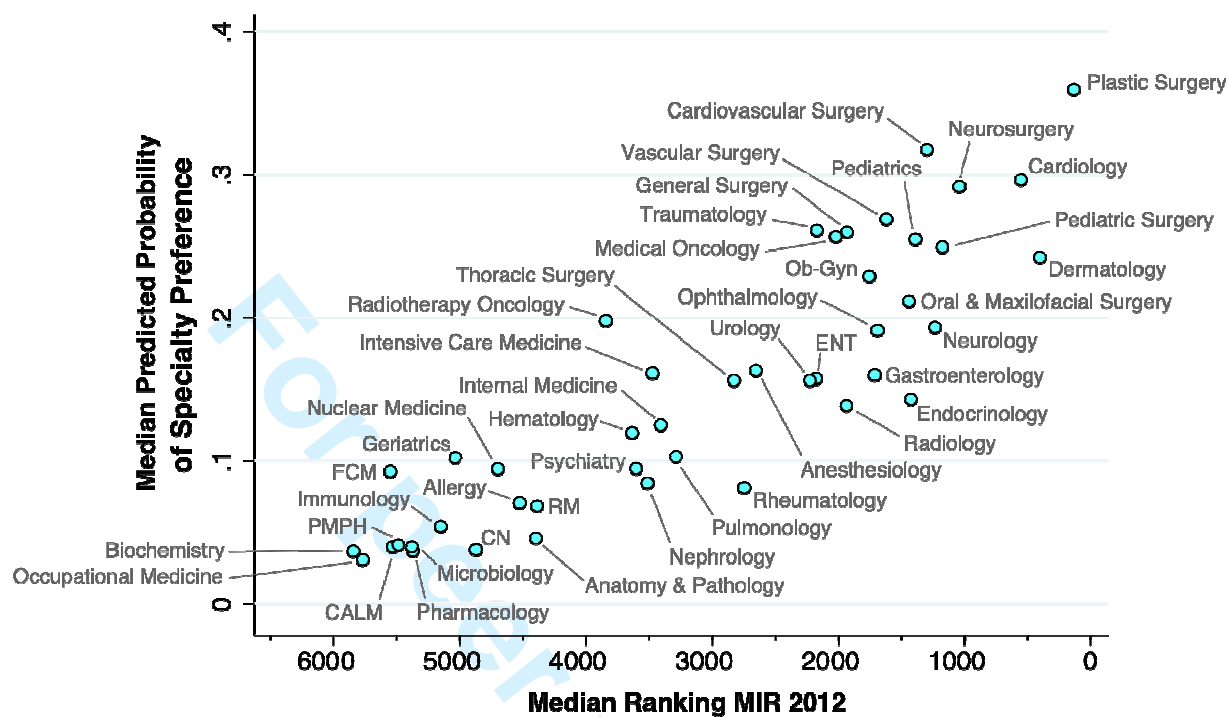

**Figure 4. Median predicted probability of specialty preference in relation to the median specialty ranking in the 2012 MIR selection process.** CALM = Clinical Analysis & Laboratory Medicine. CN = Clinical Neurophysiology. ENT = Otorhinolaryngology. FCM = Family and Community Medicine. Ob-Gyn = Obstetrics & Gynecology. PMPH = Preventive Medicine & Public Health. RM = Rehabilitation Medicine.

## References

1. Schwartz RW, Haley JV, Williams C, Jarecky RK, Strodel WE, Young B, et al. The controllable lifestyle factor and students' attitudes about specialty selection. *Acad Med* 1990;65(3):207-10.
2. Kassler WJ, Wartman SA, Silliman RA. Why medical students choose primary care careers. *Acad Med* 1991;66(1):41-3.
3. Hurley JE. Physicians' Choices of Specialty, Location, and Mode: A Reexamination within an Interdependent Decision Framework. *Journal of Human Resources* 1991;26(1):47-71.
4. Fincher RM, Lewis LA, Rogers LQ. Classification model that predicts medical students' choices of primary care or non-primary care specialties. *Acad Med* 1992;67(5):324-7.
5. Osborn EH. Factors influencing students' choices of primary care or other specialties. *Acad Med* 1993;68(7):572-4.
6. Rosenthal MP, Diamond JJ, Rabinowitz HK, Bauer LC, Jones RL, Kearl GW, et al. Influence of income, hours worked, and loan repayment on medical students' decision to pursue a primary care career. *JAMA* 1994;271(12):914-7.
7. Burack JH, Irby DM, Carline JD, Ambrozy DM, Ellsbury KE, Stritter FT. A study of medical students' specialty-choice pathways: trying on possible selves. *Acad Med* 1997;72(6):534-41.
8. Thornton J. Physician choice of medical specialty: do economic incentives matter? *Applied Economics* 2000;32(11):1419-28.
9. Gelfand DV, Podnos YD, Wilson SE, Cooke J, Williams RA. Choosing general surgery: insights into career choices of current medical students. *Arch Surg* 2002;137(8):941-5; discussion 45-7.

Specialty choice in times of economic crisis

10. Nicholson S. Physician Specialty Choice under Uncertainty. *Journal of Labor Economics* 2002;20(4):816-47.
11. Dorsey ER, Jarjoura D, Rutecki GW. Influence of controllable lifestyle on recent trends in specialty choice by US medical students. *JAMA* 2003;290(9):1173-8.
12. Thornton J, Esposto F. How important are economic factors in choice of medical specialty? *Health Econ* 2003;12(1):67-73.
13. Azizzadeh A, McCollum CH, Miller CC, 3rd, Holliday KM, Shilstone HC, Lucci A, Jr. Factors influencing career choice among medical students interested in surgery. *Curr Surg* 2003;60(2):210-3.
14. Wright B, Scott I, Woloschuk W, Brenneis F, Bradley J. Career choice of new medical students at three Canadian universities: family medicine versus specialty medicine. *CMAJ* 2004;170(13):1920-4.
15. Harris MG, Gavel PH, Young JR. Factors influencing the choice of specialty of Australian medical graduates. *Med J Aust* 2005;183(6):295-300.
16. Cochran A, Melby S, Neumayer LA. An Internet-based survey of factors influencing medical student selection of a general surgery career. *Am J Surg* 2005;189(6):742-6.
17. Gagne R, Leger PT. Determinants of physicians' decisions to specialize. *Health Econ* 2005;14(7):721-35.
18. Kutob RM, Senf JH, Campos-Outcalt D. The diverse functions of role models across primary care specialties. *Fam Med* 2006;38(4):244-51.
19. Sanfey HA, Saalwachter-Schulman AR, Nyhof-Young JM, Eidelson B, Mann BD. Influences on medical student career choice: gender or generation? *Arch Surg* 2006;141(11):1086-94; discussion 94.



Specialty choice in times of economic crisis

- 1  
2  
3  
4  
5  
6  
7  
8  
9  
10  
11  
12  
13  
14  
15  
16  
17  
18  
19  
20  
21  
22  
23  
24  
25  
26  
27  
28  
29  
30  
31  
32  
33  
34  
35  
36  
37  
38  
39  
40  
41  
42  
43  
44  
45  
46  
47  
48  
49  
50  
51  
52  
53  
54  
55  
56  
57  
58  
59  
60
20. Lambert TW, Goldacre MJ, Turner G. Career choices of United Kingdom medical graduates of 2002: questionnaire survey. *Med Educ* 2006;40(6):514-21.
21. Horn L, Tzanetos K, Thorpe K, Straus SE. Factors associated with the subspecialty choices of internal medicine residents in Canada. *BMC Med Educ* 2008;8:37.
22. Hauer KE, Durning SJ, Kernan WN, Fagan MJ, Mintz M, O'Sullivan PS, et al. Factors associated with medical students' career choices regarding internal medicine. *JAMA* 2008;300(10):1154-64.
23. Scott IM, Matejcek AN, Gowans MC, Wright BJ, Brenneis FR. Choosing a career in surgery: factors that influence Canadian medical students' interest in pursuing a surgical career. *Can J Surg* 2008;51(5):371-7.
24. West CP, Drefahl MM, Popkave C, Kolars JC. Internal medicine resident self-report of factors associated with career decisions. *J Gen Intern Med* 2009;24(8):946-9.
25. Sivey P, Scott A, Witt J, Joyce C, Humphreys J. *Why Junior Doctors Don't Want to Become General Practitioners: A Discrete Choice Experiment from the MABEL Longitudinal Study of Doctors*. Melbourne: University of Melbourne, Melbourne Institute Working Paper No. 17/10, 2010.
26. Bennett KL, Phillips JP. Finding, recruiting, and sustaining the future primary care physician workforce: a new theoretical model of specialty choice process. *Acad Med* 2010;85(10 Suppl):S81-8.
27. Goldacre MJ, Laxton L, Lambert TW. Medical graduates' early career choices of specialty and their eventual specialty destinations: UK prospective cohort studies. *BMJ* 2010;341:c3199.

Specialty choice in times of economic crisis

- 1  
2  
3  
4  
5  
6  
7  
8  
9  
10  
11  
12  
13  
14  
15  
16  
17  
18  
19  
20  
21  
22  
23  
24  
25  
26  
27  
28  
29  
30  
31  
32  
33  
34  
35  
36  
37  
38  
39  
40  
41  
42  
43  
44  
45  
46  
47  
48  
49  
50  
51  
52  
53  
54  
55  
56  
57  
58  
59  
60
28. Fukuda Y, Harada T. Gender differences in specialty preference and mismatch with real needs in Japanese medical students. *BMC Med Educ* 2010;10:15.
29. Gonzalez Lopez-Valcarcel B, Barber Perez P, Ortun Rubio V. ¿Por qué los médicos huyen y rehúyen la Medicina de Familia? Datos y claves sobre el problema en busca de soluciones. In: Ortún V, editor. *La refundación de la Atención Primaria*. Madrid: Springer Healthcare, 2011.
30. González López-Valcárcel B, Barber Pérez P. Planificación y formación de profesionales sanitarios, con foco en la atención primaria. Informe SESPAS 2012. *Gaceta Sanitaria* 2012;published online 27-Jan-2012. doi:10.1016/j.gaceta.2011.07.029.
31. Ministerio de Sanidad y Política Social. Orden SAS/2448/2010, de 15 de septiembre, por la que se aprueba la convocatoria de pruebas selectivas 2010 para el acceso en el año 2011, a plazas de formación sanitaria especializada para Médicos... *Boletín Oficial del Estado* 2010;230(Sec. II.B.):80254-449.
32. Servicio Público de Empleo Estatal (SEPE). *Información mensual de mercado de trabajo de titulados universitarios*. Madrid: Feb, 2010.
33. Balsells F, Visa L. El recorte en sanidad alcanza las urgencias del hospital de l'Esperança: Salud decidirá antes del 22 de abril los recortes en personal, camas y servicios. *El País* 2011;1 April.
34. Servicio Público de Empleo Estatal (SEPE). *Información mensual de mercado de trabajo de titulados universitarios*. Madrid: April, 2012.
35. Train K. *Discrete Choice Methods With Simulation, 2nd Edition*. New York: Cambridge University Press, 2009.

Specialty choice in times of economic crisis

- 1  
2  
3  
4  
5  
6  
7  
8  
9  
10  
11  
12  
13  
14  
15  
16  
17  
18  
19  
20  
21  
22  
23  
24  
25  
26  
27  
28  
29  
30  
31  
32  
33  
34  
35  
36  
37  
38  
39  
40  
41  
42  
43  
44  
45  
46  
47  
48  
49  
50  
51  
52  
53  
54  
55  
56  
57  
58  
59  
60
36. Hole AR. Modelling heterogeneity in patients' preferences for the attributes of a general practitioner appointment. *J Health Econ* 2008;27(4):1078-94.
37. Hosmer DW, Hosmer T, Le Cessie S, Lemeshow S. A comparison of goodness-of-fit tests for the logistic regression model. *Stat Med* 1997;16(9):965-80.
38. Compton MT, Frank E, Elon L, Carrera J. Changes in U.S. medical students' specialty interests over the course of medical school. *J Gen Intern Med* 2008;23(7):1095-100.
39. Kazerooni EA, Blane CE, Schlesinger AE, Vydareny KH. Medical students' attitudes toward radiology: comparison of matriculating and graduating students. *Acad Radiol* 1997;4(8):601-7.
40. West CP, Popkave C, Schultz HJ, Weinberger SE, Kolars JC. Changes in career decisions of internal medicine residents during training. *Ann Intern Med* 2006;145(10):774-9.
41. Leo J. España supera la barrera de los 2.000 médicos en paro *Redacción Médica* 2012;Jun 4.
42. Simoens S, Hurst J. *The supply of physician services in OECD countries*. Paris: OECD Directorate for Employment, Labour and Social Affairs, Health Working Papers No. 21, 2006.
43. Nicholson S. How Much Do Medical Students Know about Physician Income? *Journal of Human Resources* 2005;40(1):100-14.
44. OECD. 3. Health Workforce: 3.4 Remuneration of doctors (general practitioners and specialists). *Health at a Glance 2011: OECD Indicators*, 2012:66-67.
45. Ubach C, Scott A, French F, Awramenko M, Needham G. What do hospital consultants value about their jobs? A discrete choice experiment. *BMJ* 2003;326(7404):1432.
46. Scott A. Eliciting GPs' preferences for pecuniary and non-pecuniary job characteristics. *J Health Econ* 2001;20(3):329-47.

Specialty choice in times of economic crisis

- 1  
2  
3  
4 47. Gunther OH, Kurstein B, Riedel-Heller SG, König HH. The role of monetary and  
5  
6 nonmonetary incentives on the choice of practice establishment: a stated preference study of  
7  
8 young physicians in Germany. *Health Serv Res* 2010;45(1):212-29.  
9  
10 48. Sevillano EG. Los médicos denuncian que la jornada de 37,5 horas les ha restado nómina. *El*  
11  
12 *País* 2012;25 April.  
13  
14 49. Blasco P. Los médicos denuncian que, además de ampliar su horario, pierden sueldo. *El*  
15  
16 *Mundo* 2012;23-Apr.  
17  
18  
19  
20  
21  
22  
23  
24  
25  
26  
27  
28  
29  
30  
31  
32  
33  
34  
35  
36  
37  
38  
39  
40  
41  
42  
43  
44  
45  
46  
47  
48  
49  
50  
51  
52  
53  
54  
55  
56  
57  
58  
59  
60

**Percentage of Candidates Electing  
Family & Community Medicine**

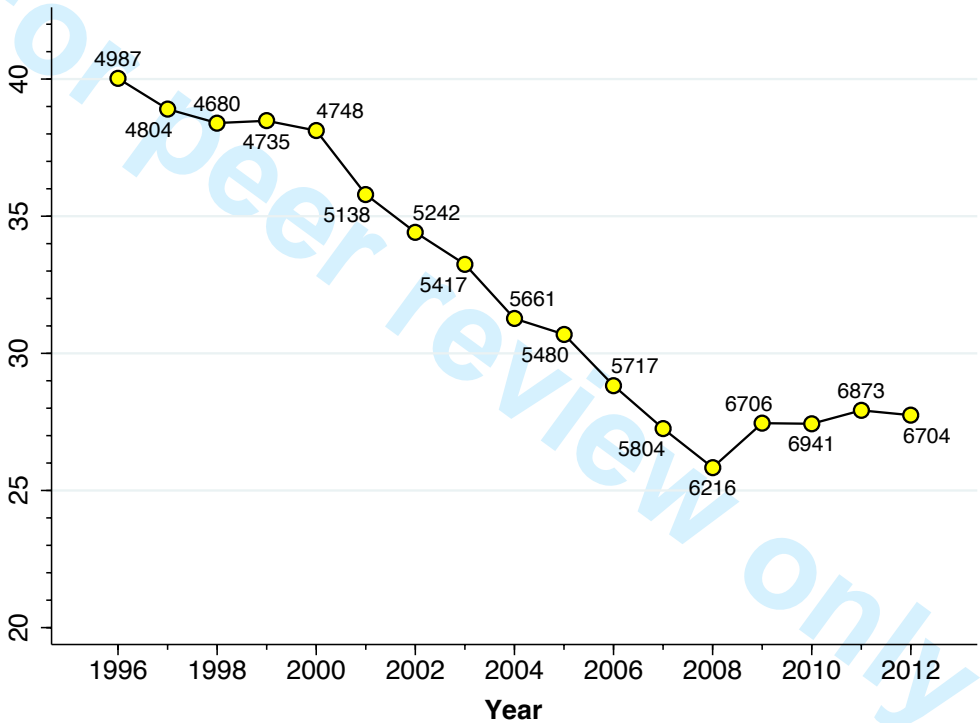

Preferred Specialty

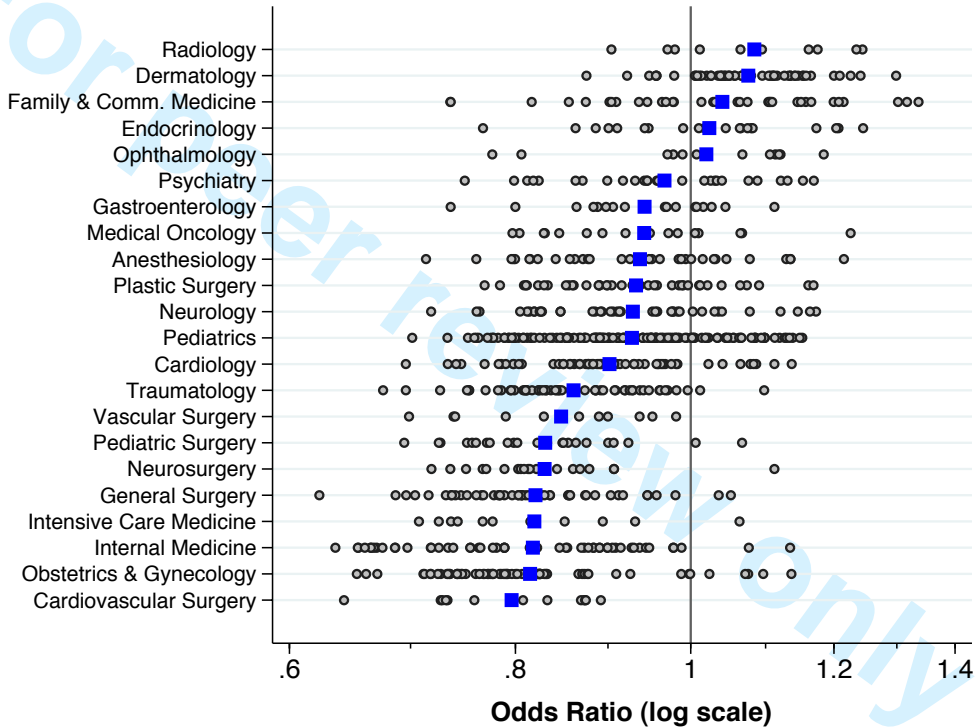

Preferred Specialty

Intensive Care Medicine  
Internal Medicine  
Traumatology  
Family & Comm. Medicine  
Pediatrics  
Radiology  
Psychiatry  
General Surgery  
Endocrinology  
Obstetrics & Gynecology  
Medical Oncology  
Pediatric Surgery  
Ophthalmology  
Neurology  
Dermatology  
Anesthesiology  
Cardiology  
Plastic Surgery  
Vascular Surgery  
Gastroenterology  
Neurosurgery  
Cardiovascular Surgery

Concordance with Favorite Specialty (%)

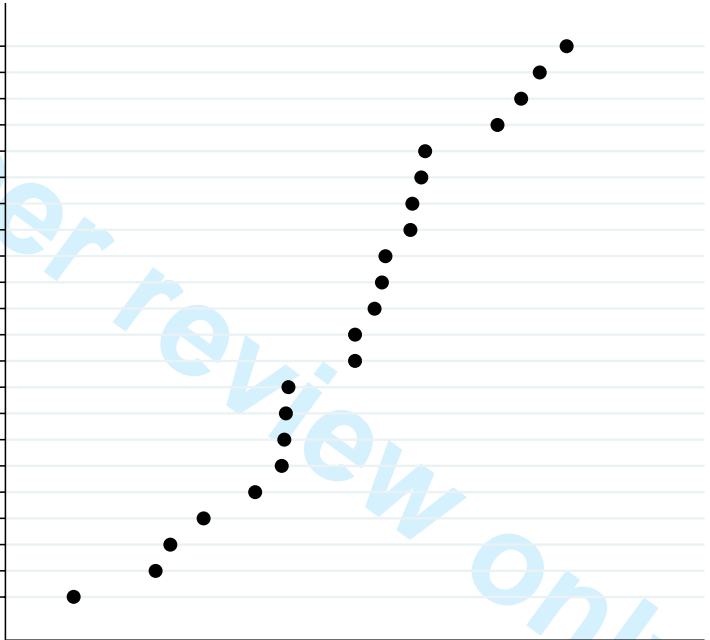

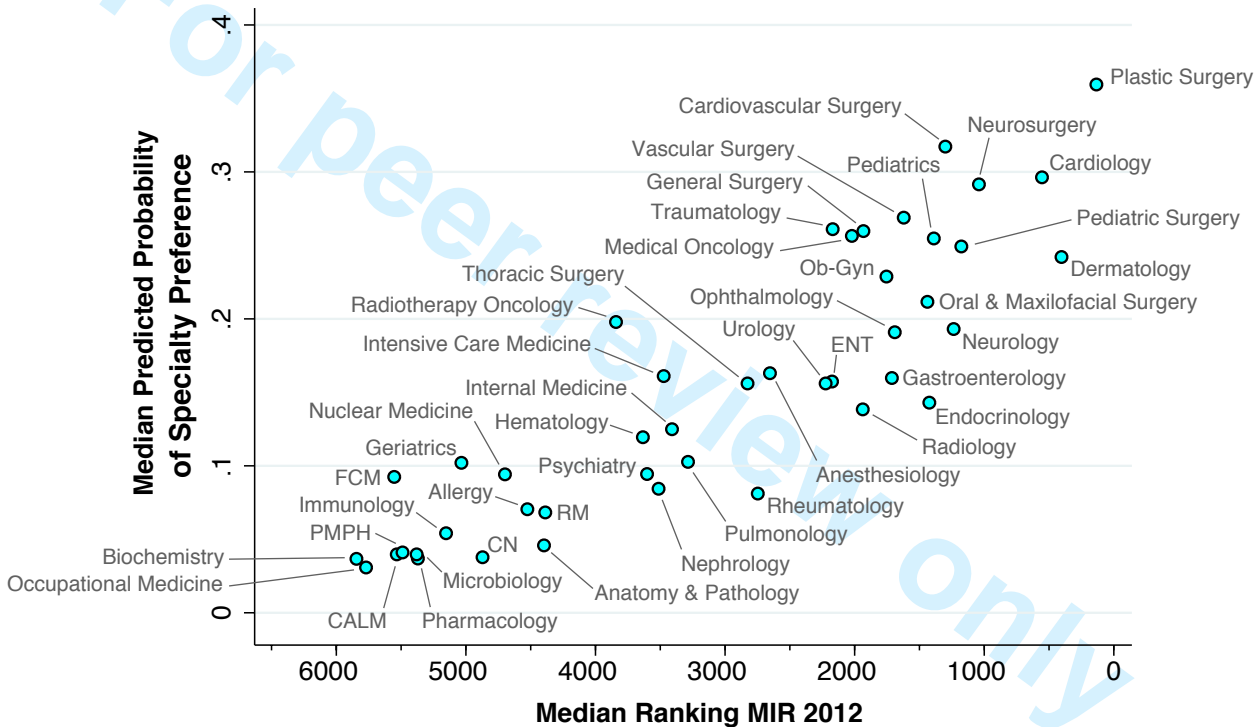





**Specialty choice in times of economic crisis: cross-sectional survey of Spanish medical students**

|                                 |                                                                                                                                                                                                                                                                                                                                                                                                                                                                |
|---------------------------------|----------------------------------------------------------------------------------------------------------------------------------------------------------------------------------------------------------------------------------------------------------------------------------------------------------------------------------------------------------------------------------------------------------------------------------------------------------------|
| Journal:                        | <i>BMJ Open</i>                                                                                                                                                                                                                                                                                                                                                                                                                                                |
| Manuscript ID:                  | bmjopen-2012-002051.R1                                                                                                                                                                                                                                                                                                                                                                                                                                         |
| Article Type:                   | Research                                                                                                                                                                                                                                                                                                                                                                                                                                                       |
| Date Submitted by the Author:   | 08-Jan-2013                                                                                                                                                                                                                                                                                                                                                                                                                                                    |
| Complete List of Authors:       | Harris, Jeffrey; Massachusetts Institute of Technology, Economics; Blackstone Valley Community Health Care, López-Valcárcel, Beatriz; Universidad de Las Palmas de Gran Canaria, Departamento de Métodos Cuantitativos en Economía y Gestión Rubio, Vicente; Universitat Pompeu Fabra, Facultad de Ciencias Económicas y Empresariales Pérez, Patricia; Universidad de Las Palmas de Gran Canaria, Departamento de Métodos Cuantitativos en Economía y Gestión |
| <b>Primary Subject Heading</b>: | Medical education and training                                                                                                                                                                                                                                                                                                                                                                                                                                 |
| Secondary Subject Heading:      | Public health, Health policy                                                                                                                                                                                                                                                                                                                                                                                                                                   |
| Keywords:                       | MEDICAL EDUCATION & TRAINING, PRIMARY CARE, Health policy < HEALTH SERVICES ADMINISTRATION & MANAGEMENT                                                                                                                                                                                                                                                                                                                                                        |
|                                 |                                                                                                                                                                                                                                                                                                                                                                                                                                                                |

SCHOLARONE™  
Manuscripts

1  
2  
3  
4  
5  
6  
7  
8  
9  
10  
11  
12  
13  
14  
15  
16  
17  
18  
19  
20  
21  
22  
23  
24  
25  
26  
27  
28  
29  
30  
31  
32  
33  
34  
35  
36  
37  
38  
39  
40  
41  
42  
43  
44  
45  
46  
47  
48  
49  
50  
51  
52  
53  
54  
55  
56  
57  
58  
59  
60

## Specialty choice in times of economic crisis: cross-sectional survey of Spanish medical students

Jeffrey E. Harris\*

Professor, Department of Economics  
Massachusetts Institute of Technology, Cambridge, Massachusetts MA 02139, USA

Beatriz González López-Valcárcel

Profesora, Departamento de Métodos Cuantitativos en Economía y Gestión  
Universidad de Las Palmas de Gran Canaria, Las Palmas de Gran Canaria 35017, Spain

Vicente Ortún Rubio

Decano, Facultad de Ciencias Económicas y Empresariales,  
Universitat Pompeu Fabra, Barcelona 08002, Spain

Patricia Barber Pérez

Profesora, Departamento de Métodos Cuantitativos en Economía y Gestión  
Universidad de Las Palmas de Gran Canaria, Las Palmas de Gran Canaria 35017, Spain

\*Corresponding author: [jeffrey@mit.edu](mailto:jeffrey@mit.edu)

## Article Summary

### Article focus.

- Ours is the first comprehensive study of the determinants of physician specialty choice in Spain, a country whose healthcare system is dominated by the public sector.
- Since 2008, when Spain entered into a severe, ongoing economic crisis, the percentage of Spanish medical school graduates electing Family and Community Medicine (FCM) has experienced a reversal after more than a decade of decline.
- In an April 2011 nationwide cross-sectional survey of graduating students from all Spanish medical schools, we focus on the likelihood of obtaining employment as a determinant of physician specialty choice.

### Key messages.

- We find that job availability has assumed a key role in determining specialty choice.
- We confirm the importance of such factors as prestige, opportunity for professional development, and private sector remuneration.
- In contrast to prior studies, we find wide variation in the importance that Spanish medical students attach to a controllable life style and reduced work hours.

### Strengths and limitations of this study.

- Our findings suggest policy levers that may take advantage of the high level of perceived job security of Family and Community Medicine and thus increase the flow of medical school graduates into the field.

1  
2  
3  
4 In the present study, we use online survey methods to achieve wide coverage  
5  
6 of all 27 of Spain's medical schools at the expense of a reduced response  
7  
8 rate. Moreover, we do not report longitudinal follow-up data on our  
9  
10 respondents' specialty preferences over time.  
11  
12  
13  
14  
15  
16  
17  
18  
19

## 20 Abstract

21  
22  
23 **Objective.** To investigate the determinants of specialty choice among graduating medical  
24 students in Spain, a country that entered into a severe, ongoing economic crisis in 2008.  
25

26  
27 **Setting.** Since 2008, the percentage of Spanish medical school graduates electing Family  
28 and Community Medicine (FCM) has experienced a reversal after more than a decade of  
29 decline.  
30  
31  
32

33  
34 **Design.** Nationwide cross-sectional survey conducted online in April 2011.  
35

36  
37 **Participants.** We invited all students in their final year before graduation from each of  
38 Spain's 27 public and private medical schools to participate.  
39  
40

41  
42 **Main outcome measures.** Respondents' preferred specialty in relation to their  
43 perceptions of: (1) the probability of obtaining employment; (2) lifestyle and work hours;  
44 (3) recognition by patients; (4) prestige among colleagues; (5) opportunity for  
45 professional development; (6) annual remuneration; and (7) the proportion of the  
46 physician's compensation from private practice.  
47  
48  
49

50  
51  
52  
53 **Results.** 978 medical students (25% of the nationwide population of students in their  
54 final year) participated. Perceived job availability had the largest impact on specialty  
55  
56  
57  
58  
59  
60

1  
2  
3 preference. Each 10-percent increment in the probability of obtaining employment  
4  
5 increased the odds of preferring a specialty by 33.7 percent (95% CI, 27.2% – 40.5%).  
6  
7  
8 Job availability was 4 times as important as compensation from private practice in  
9  
10 determining specialty choice (95% CI, 1.7–6.8). We observed considerable heterogeneity  
11  
12 in the influence of life style and work hours, with students who preferred such specialties  
13  
14 as Cardiovascular Surgery and Obstetrics & Gynecology valuing longer, rather than  
15  
16 shorter workdays.  
17  
18

19  
20 **Conclusions.** In the midst of an ongoing economic crisis, job availability has assumed  
21  
22 critical importance as a determinant of specialty preference among Spanish medical  
23  
24 students. In view of the shortage of practitioners of Family and Community Medicine,  
25  
26 public policies that take advantage of the enhanced perceived job availability of FCM  
27  
28 may help steer medical school graduates into this specialty.  
29  
30  
31  
32  
33

## 34 Introduction

35  
36  
37 During the past two decades, researchers have carried out numerous studies of the  
38  
39 determinants of specialty choice.<sup>1-37</sup> While most have been conducted in the United  
40  
41 States,<sup>1-13 16 18 19 22 24 25</sup> others have addressed the determinants of specialization in  
42  
43 Canada,<sup>14 17 21 23 32</sup> Australia,<sup>15 35</sup> the United Kingdom,<sup>20 26 30 34</sup> Ireland,<sup>29</sup> France,<sup>27 36</sup>  
44  
45 Finland,<sup>31</sup> Germany,<sup>33</sup> Spain,<sup>37</sup> and Japan.<sup>28</sup> In view of growing concerns about a shortage  
46  
47 of generalists, many studies have focused on the decision to seek a career in primary  
48  
49 care,<sup>2 4-6 18 25</sup> family medicine,<sup>14 32</sup> general practice,<sup>15 20 33 35</sup> internal medicine,<sup>22 24</sup>  
50  
51 pediatrics,<sup>30</sup> and general surgery.<sup>9 13 16 19 23 29 34</sup>  
52  
53  
54  
55  
56  
57  
58  
59  
60

1  
2  
3 An extensive list of factors influencing specialty choice has been considered,  
4  
5 including: financial remuneration,<sup>1-6 8-15 17 19 24 35</sup> life style and work hours,<sup>1 2 4-16 19 21-24 29</sup>  
6  
7  
8 33 35-37 prestige among colleagues or the general public,<sup>1-5 9 10 13-15 19 25 37</sup> mentors and other  
9  
10 role models,<sup>1 5 7 15 16 18 19 21 23 31 34 36</sup> the length of the residency training program,<sup>1 3 5 12 13 15</sup>  
11  
12 16 32 the clinical clerkship experience in medical school,<sup>1 5 13 15 16 19 21 22 25 30</sup> direct patient  
13  
14 interaction and continuity of care,<sup>2-4 9 10 13 24 27 32 33 35</sup> debt upon graduation,<sup>5 6 8 13 15 16 22 25</sup>  
15  
16 research and teaching opportunities,<sup>2 5 10 14 15 35</sup> potential for career advancement,<sup>13 15 29 31</sup>  
17  
18 influence of parents, relatives and peers,<sup>4 5 15 32</sup> malpractice litigation risk,<sup>8 9 15</sup> opportunity  
19  
20 to perform procedures or work with new technology,<sup>2 5 15 21 23</sup> intellectual challenge,<sup>7 9</sup>  
21  
22 and hospital versus ambulatory orientation.<sup>2 23</sup> Gender differences in the importance of  
23  
24 these factors have also been studied.<sup>8 19-21 27-29</sup>  
25  
26  
27  
28

29 In 2011, we conducted a cross-sectional survey of Spanish medical students in  
30  
31 their final year before electing a specialty training program. In view of the severe,  
32  
33 ongoing economic crisis that began in late 2008, we studied whether the likelihood of  
34  
35 obtaining employment had assumed a key role in determining specialty preference.  
36  
37  
38  
39  
40

### 41 **Spain's Healthcare System and the Financial Crisis**

42  
43 The Spanish healthcare system is dominated by the public sector. In 2009, total  
44  
45 healthcare expenditures constituted 9.5% of GDP, of which only 2.5% was privately  
46  
47 financed. The vast majority of physicians are employees of the public sector, where  
48  
49 salaries are fixed by separate negotiations between unions of healthcare workers and the  
50  
51 governments of each of Spain's 17 autonomous communities. Physicians in many  
52  
53 specialties have opportunities to earn additional income in the private sector, either by  
54  
55  
56  
57  
58  
59  
60

1  
2  
3  
4  
5  
6  
7  
8  
9  
10  
11  
12  
13  
14  
15  
16  
17  
18  
19  
20  
21  
22  
23  
24  
25  
26  
27  
28  
29  
30  
31  
32  
33  
34  
35  
36  
37  
38  
39  
40  
41  
42  
43  
44  
45  
46  
47  
48  
49  
50  
51  
52  
53  
54  
55  
56  
57  
58  
59  
60

treating paying patients in their own private practices or by performing consults on inpatients while on call at private hospitals. However, there is essentially no such demand for specialists in Family and Community Medicine (FCM), who work almost exclusively as full-time employees of health centers.

Medical specialization in Spain is governed by a system widely known as MIR, which stands for *Médico Interno Residente*, literally “resident medical intern.”<sup>38 39</sup> On an annual basis, the central government’s Ministry of Health authorizes post-graduate training programs in 47 different specialties, imposing limits on the number of positions (plazas) in each program. Each medical school graduate (candidato) seeking a training position is ranked on the basis of his academic transcript and his score on the annual nationwide MIR examination. In a sequential process, the top-ranked applicant first chooses from all available training programs, after which each successively ranked candidate is permitted to choose from the remaining available training slots. In the 2011 MIR cycle, for example, the Ministry of Health authorized 6,881 positions in 560 training centers throughout the country.<sup>40</sup> A total of 6,873 applicants accepted training positions through the sequential selection process.

Unemployment among graduates of Spanish medical schools was a relatively rare phenomenon until the financial crisis erupted in late 2008. With real gross domestic product in decline, the nationwide unemployment exceeding 10 percent and heading toward 20 percent, and interest rates on Spanish sovereign debt approaching record highs, federal and regional governments began to engage in increasingly severe budgetary cutbacks. The healthcare sector was not immune from these budgetary cuts. While established physicians with seniority had essentially lifetime government jobs, many

1  
2  
3 younger graduates were compelled to accept contingent employment contracts. Still  
4  
5 others could not find work at all. By February 2010, the number of out-of-work  
6  
7 physicians nationwide had for the first time crossed the psychological threshold of  
8  
9 1,000.<sup>41</sup> In the spring of 2011, when the survey described in this report was in the field,  
10  
11 there were prominent headlines about personnel cuts in the health budgets of many  
12  
13 autonomous communities, notably Catalonia.<sup>42</sup> By April 2012, with increasing austerity  
14  
15 measures, the number of unemployed physicians had broken the 2,000 barrier.<sup>43</sup>  
16  
17  
18  
19

20 There is presumptive evidence that the financial crisis has had a significant effect  
21  
22 on the career choices of recent medical school graduates. As Figure 1 indicates, the  
23  
24 percentage of candidates participating in the annual MIR selection process who elected a  
25  
26 training position in Family and Community Medicine underwent an abrupt reversal after  
27  
28 2008. For the past three years (2010–2012), the number of candidates electing FCM has  
29  
30 been limited by the number of available training positions, whereas during 2006–2009,  
31  
32 some training positions in FCM remained unfilled.  
33  
34  
35  
36  
37  
38  
39

## 40 Subjects and Methods

### 41 **Cross-sectional survey**

42  
43 In April 2011, with the assistance of professors, deans and student associations, we  
44  
45 invited all students in their final year in each of the 27 medical schools of Spain to  
46  
47 participate in a survey of career preferences. Students were not contacted individually.  
48  
49 Instead, posters advertising the survey and directing students to the survey web site were  
50  
51 posted on every medical school campus. Participants were eligible to win a lottery prize.  
52  
53  
54  
55 Participation in the survey was voluntary, and anonymity was assured. With the  
56  
57  
58  
59  
60



1  
2  
3 exception of students at the University of Las Palmas de Gran Canaria, who took the  
4  
5 electronic survey as a classroom-based pilot, all respondents completed the survey online.  
6  
7  
8  
9

### 10 **Survey questionnaire**

11  
12 The electronic survey questionnaire contained three blocks: (1) personal data (age, sex,  
13  
14 nationality, residential postal code, university, anticipated date of graduation, and how  
15  
16 many parents or grandparents were physicians); (2) questions eliciting preferences among  
17  
18 the 47 specialties in Spain's MIR system of postgraduate training; and (3) questions  
19  
20 eliciting perceptions and expectations concerning these specialties.  
21  
22  
23

24  
25 In the second block, in particular, each student was first asked to designate his  
26  
27 *preferred specialty*, that is, which specialty he would choose in the annual MIR selection  
28  
29 process if he faced no restrictions as a result of his academic performance or his score on  
30  
31 the nationwide exam. Each student was then asked to designate his *favorite specialty*, that  
32  
33 is, which specialty he enjoyed the most, without regard to remuneration or working  
34  
35 conditions (“Sin tener en cuenta los aspectos económicos, condiciones laborales, etc.,  
36  
37 ¿cuál es la especialidad que más te gusta?”).  
38  
39  
40

41  
42 In the third block, each student was presented with seven questions concerning  
43  
44 each specialty within a limited menu of six specialties. The menu included the preferred  
45  
46 specialty he had just chosen in the second block, the specialty of Family and Community  
47  
48 Medicine, and four other specialties chosen at random from four balanced subsets. Each  
49  
50 subset contained medical, surgical and diagnostic specialties, with one specialty in each  
51  
52 quartile of the global ranking of specialties observed in the MIR 2010 selection cycle.<sup>38</sup>  
53  
54  
55  
56  
57  
58  
59  
60

1  
2  
3  
4  
5  
6  
7  
8  
9  
10  
11  
12  
13  
14  
15  
16  
17  
18  
19  
20  
21  
22  
23  
24  
25  
26  
27  
28  
29  
30  
31  
32  
33  
34  
35  
36  
37  
38  
39  
40  
41  
42  
43  
44  
45  
46  
47  
48  
49  
50  
51  
52  
53  
54  
55  
56  
57  
58  
59  
60

The seven questions, whose translated text appears in Table 1, addressed the following attributes of each specialty: (1) the probability of obtaining employment; (2) lifestyle and work hours; (3) recognition by patients; (4) prestige among colleagues; (5) opportunity for professional development; (6) annual remuneration for a physician with 10–15 years experience; and (7) the proportion of the physician's compensation from private practice. Four of the attributes (2, 3, 4 and 5) were measured on a 10-point scale, while two (1 and 7) were gauged on a percentage scale from 0 to 100. The remaining attribute (6) was measured in thousands of euros. We chose these seven attributes based upon our review of the literature and our discussions with experts knowledgeable about Spanish healthcare institutions. Inclusion of the first attribute, in particular, was motivated by our hypothesis that the ongoing economic crisis and widely publicized budgetary cuts in the health sector had influenced students' perceptions about the likelihood of employment.

### Statistical methods

We employed the mixed multinomial logit model<sup>44</sup> to assess the influence of each of the seven attributes on students' choice of preferred specialty. The mixed multinomial logit model differs from the standard multinomial logit model in that the coefficients of each predictor variable may vary randomly in the population. In the context of discrete choice modeling, the mixed multinomial logit model captures the potential heterogeneity of individual preferences. For example, in the case of attribute 2, the mixed model admits the possibility that some students prefer a specialty with reduced work hours and a

1  
2  
3 comfortable life style, while others prefer a specialty with long work hours and little  
4  
5  
6 leisure time.

7  
8 In our application of the mixed multinomial logit model, the observations  
9  
10 corresponded to the six specialties within the menus evaluated by each of the student  
11  
12 respondents. For each student, the dependent variable was a binary indicator equal to 1  
13  
14 for the preferred specialty and 0 for the remaining five specialties in the student's menu.  
15  
16 The independent variables were each student's valuations of the seven attributes. In  
17  
18 addition, we included interaction terms between each of the seven attributes and each  
19  
20 personal characteristic in order to test whether the coefficients of the attributes differed  
21  
22 by sex, age, university, expected graduation date, or the presence of physicians in the  
23  
24 family. We also tested interactions between each attribute and a binary variable  
25  
26 indicating concordance between the student's preferred and favorite specialty.  
27  
28  
29  
30  
31

32 Adhering to the mixed logit specification, we further assumed that the coefficients  
33  
34 of each attribute were normally distributed in the population with unknown mean and  
35  
36 standard deviation. To assess whether there was significant heterogeneity in the  
37  
38 coefficients of each attribute, apart from those differences attributable to the foregoing  
39  
40 observed personal characteristics, we tested the null hypothesis that the estimated  
41  
42 standard deviation of each coefficient's population distribution was equal to zero. We  
43  
44 employed the chi-squared test based on the log likelihood ratio to assess the overall  
45  
46 model goodness of fit.  
47  
48  
49

50 To estimate our mixed multinomial logit model, we relied on the *mixlogit* routine  
51  
52 in Stata 11 statistical software.<sup>45</sup> Each raw coefficient outputted by this routine  
53  
54 corresponds to the effect of a unit change in each attribute on the logarithm of the odds of  
55  
56  
57  
58  
59  
60

1  
2  
3 preferring a specialty. Each raw coefficient can also be interpreted as the contribution of  
4  
5 a unit change in each attribute to the “utility” of the specialty. In the tabulated results  
6  
7 below, we report the exponentiated values of the raw coefficients, that is, the effect of a  
8  
9 unit change on the odds of specialty preference. However, we used the raw coefficients to  
10  
11 assess the quantitative tradeoffs between attributes. For example, to estimate the  
12  
13 percentage increase in the proportion of the physician’s compensation from private  
14  
15 practice (attribute 7) that would yield the same utility as a 1-percent increase in the  
16  
17 probability of obtaining employment (attribute 1), we computed the ratio of the raw  
18  
19 coefficient of attribute 1 to the raw coefficient of attribute 7.  
20  
21  
22  
23

24  
25 Finally, to assess the external validity of our mixed multinomial logit model, we  
26  
27 compared its predictions of specialty choice with the global ranking of specialties  
28  
29 observed among the same nationwide cohort of medical graduates in the 2012 MIR  
30  
31 selection process. We chose the 2012 MIR cycle for comparison because the students  
32  
33 responding to our April 2011 survey subsequently graduated from medical school in June  
34  
35 2011, then studied for and took the MIR exam in January 2012, and then made their  
36  
37 specialty selections during March of that year. Specifically, for each specialty within each  
38  
39 student’s menu, we computed the predicted probability that the student would prefer that  
40  
41 specialty. For each specialty, we then compared its median predicted probability, as  
42  
43 derived from our model, with its median ranking among all candidates who elected a  
44  
45 specialty in the 2012 MIR cycle.  
46  
47  
48  
49  
50  
51  
52  
53  
54  
55  
56  
57  
58  
59  
60

## Results

### Survey Response

Out of a total population of 3,874 registered sixth-year medical students nationwide, we received 978 responses (or 25%). These responses included students from each of Spain's 27 medical schools. While the response rate varied among medical schools, there were no significant differences in the gender or age composition of the respondents and the entire nationwide population (survey respondents: 71% female, mean age 24.1 years; nationwide population of sixth-year students: 71% female, mean age 24.7 years).

### Descriptive Statistics

Among the 978 medical students responding to the survey, 892 (91.2%) designated a preferred specialty, of whom 836 (93.7%) also designated a favorite specialty. For each of the seven questions, Table 1 shows the corresponding sample means and standard deviations of students' responses for FCM and for all remaining specialties combined. For all seven attributes, the differences in the mean ratings between FCM and other specialties combined were statistically significant ( $P < 0.001$ ).

### Predictors of Specialty Preference

Table 2 gives the principal results of our regression analyses. Model 1 represents the standard multinomial logit regression, in which all attribute coefficients are fixed, while Models 2 through 4 represent mixed multinomial logit regressions. In Model 2, in particular, the coefficient of attribute 2 (lifestyle and work hours) is permitted to vary within the population. In Model 3, interaction terms with attribute 6 (annual remuneration with 10–15 years' experience) are included as explanatory variables. In Model 4, attribute

1  
2  
3 6 and its interactions are removed altogether. We omit the results of other models where  
4  
5 we found insignificant interactions between each attribute and sex, age, university,  
6  
7 expected graduation date, the presence of physicians in the family, as well as a binary  
8  
9 variable indicating concordance between the student's preferred and favorite specialty.  
10  
11

12  
13 In all model specifications in Table 2, attribute 1 (the probability of obtaining  
14  
15 employment) significantly influenced specialty preference. In Model 4, for example, each  
16  
17 10-percent increment in the probability of obtaining employment increased the odds of  
18  
19 preferring a specialty by 33.7 percent (95% confidence interval (CI), 27.2% – 40.5%).  
20  
21 The magnitude of the effect was comparable to that of attribute 5 (professional  
22  
23 development, including the possibility of promotion). Attributes 3 (recognition by  
24  
25 patients) and 4 (prestige among colleagues) had smaller but significantly positive  
26  
27 influences on specialty choice. For both attributes, a 1-point increment on a 10-point  
28  
29 scale increased the odds of preferring a specialty by approximately 10–11 percent. The  
30  
31 findings of Model 4 were not significantly altered when we included an interaction term  
32  
33 for students at the University of Las Palmas de Gran Canaria, who took the electronic  
34  
35 survey as a classroom-based pilot. (Results not shown.)  
36  
37  
38  
39  
40  
41  
42  
43

#### 44 *Heterogeneity of Preferences for Life Style and Work Hours*

45  
46 Although attribute 2 (life style and work hours) appeared to have a significant negative  
47  
48 influence on specialty choice, our mixed multinomial logit Models 2, 3 and 4 revealed  
49  
50 considerable population heterogeneity in this effect. In Model 4, for example, the  
51  
52 population average effect was 0.907, with a 1-standard deviation range from 0.606 to  
53  
54 1.208 (that is,  $0.907 \pm 0.301$ ). Equivalently, a 1-point increment on a 10-point scale  
55  
56  
57  
58  
59  
60

1  
2  
3 reduced the odds of preferring a specialty *on average* by an estimated 9.3 percent.  
4  
5 However, for 68 percent of the students (which corresponds to the 1-standard deviation  
6 range for a normal distribution), the effect of a 1-point increment ranged from a 39.4  
7  
8 percent decrease to a 20.8 percent increase in the odds of preferring a specialty. Attribute  
9  
10 2 was the only explanatory variable to show significant population heterogeneity in our  
11  
12 mixed multinomial logit regressions.  
13  
14  
15

16  
17 Figure 2 offers a visual representation of the population heterogeneity in the  
18 influence of lifestyle and work hours. Each open point in the figure represents one  
19 student. The points are arranged in rows corresponding to the student's preferred  
20 specialty. Among the 887 students included in Model 4, a total of 231 (or 26 percent) had  
21 a positive predicted effect of lifestyle and work hours on specialty preference.  
22  
23  
24  
25  
26  
27  
28

29 Figure 2 displays considerable heterogeneity between preferred specialties. For  
30 example, among the group of 53 students preferring Dermatology, whose predicted  
31 effects are arrayed in the second row in Figure 2, the average effect of a 1-point  
32 increment a 10-point scale of favorable lifestyle and work hours was a 7.6-percent  
33 increase in the odds of preferring that specialty (corresponding to the solid blue square in  
34 the second row). Within this group, the predicted effect ranged from a 12.5-percent  
35 decrease to a 29.9-percent increase. For the 35 students preferring Family and  
36 Community Medicine, arrayed on the third row, the average effect of a 1-point increment  
37 along the scale of lifestyle and work hours was a 4.1-percent increase in the odds of  
38 specialty preference (corresponding to the solid blue square in the third row), with a  
39 predicted effect ranging from a 26.4-percent decrease to a 33.6-percent increase. By  
40 contrast, among the group of 73 students preferring Obstetrics & Gynecology, whose  
41  
42  
43  
44  
45  
46  
47  
48  
49  
50  
51  
52  
53  
54  
55  
56  
57  
58  
59  
60

1  
2  
3 predicted effects are arrayed in the next-to-last row of the figure, the average effect of a  
4  
5 1-point increment was an 18.5 percent decrease in the odds of preferring that specialty  
6  
7 (the next-to-last solid blue square). Within this group, the predicted effect ranged from a  
8  
9 34.6-percent decrease to a 13.7-percent increase.  
10  
11

### 12 13 14 15 *Concordance between Preferred and Favorite Specialties*

16  
17 Among the 892 students who reported both a preferred and a favorite specialty, we  
18  
19 observed a concordance between the two responses in 676 students (or 75.8%). Figure 3  
20  
21 shows the rate of concordance, classified by preferred specialty. The rate of concordance  
22  
23 ranged from a low of 53.8 percent among students who preferred Cardiovascular Surgery  
24  
25 to 90.9 percent among those who preferred Intensive Care Medicine. The rate of  
26  
27 concordance for Family and Community Medicine was 85.7 percent.  
28  
29  
30  
31  
32  
33

### 34 *Opportunities for Private Sector Remuneration*

35  
36 In Models 1 and 2 in Table 2, attribute 6 (annual remuneration with 10–15 years  
37  
38 experience) had a significant negative influence on specialty preference, while attribute 7  
39  
40 (proportion of compensation from private practice) had a significant positive effect. To  
41  
42 address the apparent inconsistency between the estimated effects of the two different  
43  
44 attributes, we included interaction terms with attribute 6 in our specification of Model 3.  
45  
46 We found that the negative relation between annual remuneration and specialty  
47  
48 preference remained statistically significant for female students and for those who  
49  
50 reported a concordance of preferred and favorite specialty. There was no relationship  
51  
52 between the effect of annual remuneration and a student's age.  
53  
54  
55  
56  
57  
58  
59  
60



1  
2  
3  
4  
5  
6  
7  
8  
9  
10  
11  
12  
13  
14  
15  
16  
17  
18  
19  
20  
21  
22  
23  
24  
25  
26  
27  
28  
29  
30  
31  
32  
33  
34  
35  
36  
37  
38  
39  
40  
41  
42  
43  
44  
45  
46  
47  
48  
49  
50  
51  
52  
53  
54  
55  
56  
57  
58  
59  
60

Finally, in Model 4, when we dropped attribute 6 altogether, the effect of attribute 7 remained significant and positive, but its magnitude was decreased. With annual remuneration included as an explanatory variable, each 10-percent increment in the proportion of compensation from private practice increased the odds of preferring a specialty by approximately 20–22 percent. With annual remuneration excluded, the effect of 10-percent increment in the proportion of compensation from private practice compensation increased the odds of specialty preference by only 7 percent.

#### *Tradeoff between Job Availability and Opportunities for Private Sector Remuneration*

We focused specifically on the quantitative tradeoff between job availability (attribute 1) and opportunities for private sector remuneration (attribute 7). Relying on the results of Model 4, we found that the raw coefficients of attributes 1 and 7 were, respectively, 0.290 (95% CI, 0.241–0.340) and 0.069 (95% CI, 0.028–0.110). The percentage increase in the proportion of the physician's compensation from private practice (attribute 7) that would yield the same utility as a 1-percent increase in the probability of obtaining employment (attribute 1) was therefore  $0.290/0.069 = 4.2$ . Based on a linear approximation of the variance of the ratio of two random variables, we computed the 95% confidence interval around this estimate as 1.7–6.8.

#### **External Validity: Comparison with MIR 2012 Global Rankings**

For all four models, the chi-squared statistic based on the log likelihood ratio showed a significant goodness of fit ( $P < 0.002$ ). As a further check of internal validity, we found a

1  
2  
3 close match between the observed and predicted probabilities of specialty choice when  
4  
5 broken down by decile of predicted probability.<sup>46</sup>  
6  
7

8 Figure 4 displays a check of external validity. For each specialty, the figure plots  
9  
10 median predicted probability of specialty preference against the median specialty ranking  
11  
12 in the 2012 MIR cycle. The latter variable is plotted on a reverse scale since the most  
13  
14 preferred specialties in the MIR selection process will have the lowest ranking numbers.  
15  
16 Also plotted is the ordinary least squares regression line relating the two variables. The  
17  
18 Spearman rank correlation between the two variables was  $-0.88$  and highly significant ( $P$   
19  
20  $< 0.0001$ ).  
21  
22  
23

24 The strong correlation between the model predictions and the MIR rankings can  
25  
26 be seen through a comparison of Cardiology at the upper right, Anesthesiology near the  
27  
28 center, and Family and Community Medicine (FCM) near the bottom left. Thus, among  
29  
30 the 6,704 candidates nationwide who elected a specialty during the 2012 MIR selection  
31  
32 process, the median ranking of those candidates choosing Cardiology was 555. (Only two  
33  
34 specialties had a higher median ranking: Plastic Surgery at 136, and Dermatology at 404.)  
35  
36 From a menu of six specialties offered to students participating in our survey, the median  
37  
38 predicted probability of preferring Cardiology was 29.6 percent. For Anesthesiology, by  
39  
40 contrast, the median ranking in the 2012 MIR cycle was 2,652, while the median  
41  
42 predicted probability among survey respondents was 16.3 percent. For Family and  
43  
44 Community Medicine, the median ranking in the 2012 MIR cycle was 5,552, while the  
45  
46 median predicted probability among survey respondents was 9.2 percent.  
47  
48  
49  
50  
51  
52  
53  
54  
55  
56  
57  
58  
59  
60

## Discussion

In a cross-sectional survey of medical students in their final year before graduation, conducted in the midst of Spain's economic crisis, we found that job availability had significant impact on the specialty preference. Based upon our Model 4 specification, we found that each 10-percent increment in the probability of obtaining employment increased the odds of preferring a specialty by 33.7 percent (95% CI, 27.2% – 40.5%). Moreover, we observed considerable variability in the effect of lifestyle and work hours on students' specialty preferences. Among students who would elect Dermatology if there were no restrictions on specialty choice, the average effect of a 1-point increment a 10-point scale of favorable lifestyle and work hours was a 7.6-percent increase in the odds of preferring that specialty. By contrast, among students preferring Obstetrics & Gynecology, the average effect of a 1-point increment was an 18.5 percent decrease in the odds of preferring that specialty.

We also asked students to designate their favorite specialty, that is, the specialty that they enjoyed the most, independent of future remuneration or working conditions. The concordance between students' preferred and favorite specialties varied considerably. Approximately 54 percent of students who preferred Cardiovascular Surgery also designated it as their favorite specialty. By contrast, approximately 86 percent of students who preferred Family and Community Medicine also designated it as their favorite specialty, while 91 percent of students who preferred Intensive Care Medicine also designated it as their favorite specialty.

Our survey included two attributes that reflected different aspects of physician compensation: the average remuneration of a physician with 10–15 years experience, and

1  
2  
3 the proportion of compensation from private practice. We found that the former had an  
4  
5 unexpectedly negative relation to specialty preference, particularly among female  
6  
7 students and those favorite specialty matched their preferred specialty, while the latter  
8  
9 had a significant positive relation to specialty preference (Model 3). Eliminating the  
10  
11 former from our regression analysis (Model 4), we estimated the tradeoff between job  
12  
13 security and opportunities for private practice. An increase of approximately 4 percent in  
14  
15 the proportion of the physician's compensation from private practice would yield the  
16  
17 same utility as a 1-percent increase in the probability of obtaining employment.  
18  
19

20  
21  
22 Finally, as an external validity check, we found a high correlation between the  
23  
24 specialty ranking predicted by our mixed multinomial logit model with the nationwide  
25  
26 specialty ranking in the 2012 MIR selection process. In particular, the median probability  
27  
28 that a student would select Family and Community Medicine out of a menu of six  
29  
30 specialty choices was approximately 9 percent, while the median MIR ranking of this  
31  
32 specialty was 5,552 out of 6,704 candidates.  
33  
34  
35  
36  
37  
38

### 39 **Study Limitations**

40  
41 Our study has a number of important limitations. To begin with, our survey sample of  
42  
43 978 respondents constituted only 25% of the entire nationwide population of 3,874  
44  
45 registered students in their final year of medical school. While our sample covered all 27  
46  
47 of Spain's medical schools, and while we found no significant difference in gender or age  
48  
49 composition between our sample and the entire nationwide population, the apparently  
50  
51 low response rate raises the possibility that our conclusions cannot be generalized or are  
52  
53 subject to non-response bias.  
54  
55  
56  
57  
58  
59  
60

1  
2  
3  
4  
5  
6  
7  
8  
9  
10  
11  
12  
13  
14  
15  
16  
17  
18  
19  
20  
21  
22  
23  
24  
25  
26

Open-ended online surveys generally yield much lower response rates than a direct personal invitation via postal mail accompanied by a paper questionnaire.<sup>47</sup> In particular, surveys of specialty choice among students in a single medical school or clinical rotation have yielded high response rates ranging from 65 to 97 percent.<sup>4 5 7 9 13 28-30 34 37</sup> By contrast, an Internet-based survey soliciting participation of students in 70 U.S. medical schools received online responses from students in only 16 schools.<sup>16</sup> An online survey covering students in all five medical schools in the federal state of Baden-Wuerttemberg in Germany yielded only 11% of eligible students.<sup>33</sup> A recent online survey of students taking the 2011 National Grading Examination in France yielded a 24% response rate.<sup>36</sup>

27  
28  
29  
30  
31  
32  
33  
34  
35  
36  
37  
38  
39  
40  
41  
42  
43  
44  
45

Despite the low response rate, our Internet-based survey achieved wide coverage at low cost. It is at least arguable that the conclusions from our sample of 978 students from all 27 of Spain's medical schools are more generalizable than a hypothetical study of a 100-percent sample of 978 students from a single medical school. Nor do we have any evidence of significant non-response bias. Students at the University of Las Palmas de Gran Canaria, who took the survey as a classroom pilot and had a higher response rate, nonetheless placed the same valuation on job availability as those who took the survey online.

46  
47  
48  
49  
50  
51  
52  
53  
54  
55  
56  
57  
58  
59  
60

An additional limitation of our study is the lack of prior survey results for comparison. We surveyed students only once in April 2011. We have no data from a comparable cross-sectional survey carried out before the onset of Spain's economic crisis in late 2008. Our results are at least consistent with the finding from a 2009 survey in Ireland – carried out in the midst of the country's financial crisis – that medical students

1  
2  
3 and junior doctors attached high importance to “future employment” in specialty  
4  
5 choice.<sup>29</sup> A 2010 survey of all first- through sixth-year medical students from a single  
6  
7 Spanish medical school found that “quality of life” and “professional prestige” were  
8  
9 important factors in specialty choice, but aspects of job security were not considered.<sup>37</sup>  
10  
11 Further confirmation of the lasting importance of job security in specialty choice will  
12  
13 require repeat surveys once employment prospects for physicians have improved.  
14  
15

16  
17  
18 Nor do we report longitudinal follow-up data on the evolution of our respondents’  
19  
20 specialty preferences over time. There is evidence from longitudinal studies that students’  
21  
22 specialty preferences evolve during medical school.<sup>48,49</sup> In a study of internal medicine  
23  
24 residents in the United States, 62 percent changed the subspecialty career choice at least  
25  
26 once during residency.<sup>50</sup> In a longitudinal follow-up of U.K. medical graduates 10 years  
27  
28 after graduation, approximately one-quarter were working in a specialty different from  
29  
30 that chosen 3 years after graduation.<sup>26</sup> It is notable, however, that 91.2% of students that  
31  
32 we surveyed reported a preferred specialty, whereas in the United Kingdom, 28% of  
33  
34 medical school graduates in the 1990s knew their preferred specialty one year after  
35  
36 graduation.<sup>26</sup> The high correlation between specialty choice predicted by our model and  
37  
38 specialty choices observed in the MIR 2012 cycle (Figure 3) does not suggest a marked  
39  
40 shift in preferences during the one-year period after medical school graduation, during  
41  
42 which prospective candidates study for the national exam and then participate in the  
43  
44 sequential selection process.  
45  
46  
47  
48  
49

50  
51 The explanatory variables in our model (Table 1) were derived from students’  
52  
53 perceptions and expectations, rather than objective data. It is entirely possible, for  
54  
55 example, that students exaggerated the importance of job security (attribute 1). By April  
56  
57  
58  
59  
60

1  
2  
3 2012, with Spain's overall unemployment rate hovering around 25%, the psychologically  
4  
5 menacing figure of 2,000 unemployed doctors<sup>51</sup> still represented only 1 percent of the  
6  
7 active physician workforce. While a few studies have correlated specialty preferences  
8  
9 with objective data on remuneration, work hours, malpractice risk, and debt upon  
10  
11 graduation,<sup>8 12</sup> we stress that students' subjective perceptions and expectations are the  
12  
13 principal determinants of specialty choice.  
14  
15

16  
17 While a number of studies have focused on the "controllable lifestyle" as an  
18  
19 important determinant of specialty choice,<sup>1 2 4-16 19 21-24 52</sup> our results shed new light on the  
20  
21 heterogeneity of preferences for lifestyle and work hours. We find, in fact, that only 26  
22  
23 percent of respondents placed a positive value on reduced work hours, while 74 percent  
24  
25 placed a positive value on working more (as shown by the distribution of points in Figure  
26  
27 2). One possible explanation is that, in a healthcare system where public-sector salaries  
28  
29 are fixed by collective bargaining, taking on additional on-call assignments after regular  
30  
31 working hours is viewed primarily as a means of increasing remuneration. In the EuroStat  
32  
33 Labor Force Surveys, Spanish physicians reported working an average of 39 hours per  
34  
35 week,<sup>53</sup> even though the collectively agreed-upon formal work week was 35 hours.  
36  
37  
38  
39  
40

41 Our failure to find a significant positive effect of annual remuneration (attribute 6)  
42  
43 may reflect students' inadequate knowledge of physicians' salaries, a phenomenon that  
44  
45 has also been observed in the U.S.<sup>54</sup> It is possible that students' estimates of remuneration  
46  
47 were overly influenced by short-term concerns about job security, even though the  
48  
49 underlying question was framed over a 10–15 year horizon. Nationally representative  
50  
51 data on the earnings of Spanish physicians have not been published. Students' estimates  
52  
53 of the annual remuneration of a non-FCM specialist were on average 44% greater than  
54  
55  
56  
57  
58  
59  
60

1  
2  
3 that of a practitioner of FCM (Table 1), a value that falls within the range of specialist-  
4  
5 GP remuneration ratios of other OECD countries.<sup>55</sup>  
6

7  
8 In Canada, physicians' fee-for-service payments correlate strongly with income,<sup>17</sup>  
9  
10 whereas in the United Kingdom, opportunities for non-NHS consultant work constitute  
11  
12 an important determinant of variations in income.<sup>56</sup> Our finding that attribute 7 was a  
13  
14 significant predictor of specialty choice indicates that, in Spain's healthcare system where  
15  
16 publicly financed salaries are the dominant form of physician compensation,  
17  
18 opportunities for additional private-sector employment are a more sensitive proxy for  
19  
20 physician income. For this reason, we based our calculations of the tradeoff between job  
21  
22 security and remuneration on the results of Model 4, which excludes attribute 6 entirely.  
23  
24  
25  
26

27 A few studies have employed a discrete choice experiment – rather than a cross-  
28  
29 sectional survey – to assess the determinants of physicians' choice of specialty,<sup>35</sup> working  
30  
31 conditions,<sup>56 57</sup> and urban versus rural practice.<sup>58</sup> A discrete choice experiment has the  
32  
33 advantage that each potential determinant of physician choice can be independently  
34  
35 controlled and varied randomly. In principle, such a study design might have helped us  
36  
37 distinguish more precisely between total remuneration (attribute 6) and opportunities for  
38  
39 private sector employment (attribute 7). It might also have allowed us to assess more  
40  
41 precisely the extent to which the “workaholics” in our study, who preferred specialties  
42  
43 with more working hours (attribute 2), would trade off higher income for reduced leisure  
44  
45 time. One drawback of the discrete choice experimental design is that respondents choose  
46  
47 between hypothetical choices constructed by the experimenter, whereas in our cross-  
48  
49 sectional study, we directly observe the perceived attributes of the actual specialty  
50  
51 options available to graduating medical students. While the results of discrete choice  
52  
53  
54  
55  
56  
57  
58  
59  
60



1  
2  
3 experiments can be used in simulations, our cross-sectional design thus facilitates  
4  
5 external validation of our results (Figure 4).  
6  
7

8 We asked students to report both their preferred and favorite specialties, a  
9  
10 distinction we have not encountered in any other study. While Spanish medical students  
11  
12 generally report a high level of concordance between the two (76%), we observed  
13  
14 considerable variation by preferred specialty (Figure 2). It is noteworthy that five of the  
15  
16 highest ranked specialties in the 2011 MIR cycle (Cardiovascular Surgery, Neurosurgery,  
17  
18 Plastic Surgery, Cardiology and Dermatology; see Figure 4) had low levels of  
19  
20 concordance. By contrast, the observed high levels of concordance for Internal Medicine  
21  
22 and Family and Community Medicine suggest that students who prefer these specialties  
23  
24 do so despite the low salaries, minimal opportunities for private-sector remuneration, or  
25  
26 unfavorable working conditions. This conclusion is further supported by the observed  
27  
28 negative effect of the interaction between concordance and remuneration in Model 3  
29  
30 (Table 2).  
31  
32  
33  
34  
35  
36  
37  
38  
39

### 40 **Policy Implications**

41 Increased remuneration, more favorable working conditions and enhanced prestige have  
42  
43 routinely been proposed as incentives to lure medical students into primary care and  
44  
45 family practice. In Spain, however, physician remuneration within the public sector is  
46  
47 determined by decentralized collective bargaining between unions and local  
48  
49 governments. Opportunities for practitioners of Family and Community Medicine to earn  
50  
51 additional income in the private sector are scarce and even less under the control of the  
52  
53 central government. Improvements in working conditions and enhancement of prestige  
54  
55  
56  
57  
58  
59  
60

1  
2  
3 are longer-term solutions that will require reformulation of the nature of work of the  
4  
5 primary care physician and the role of community health centers.<sup>38 39</sup>  
6  
7

8 Our findings, by contrast, suggest other shorter-term policy levers that may take  
9  
10 advantage of the high level of perceived job availability of FCM (Table 1) and thus  
11  
12 increase the flow of medical school graduates into the field. To the extent that the  
13  
14 healthcare budgets of the country's 17 autonomous communities must continue to endure  
15  
16 budgetary cuts, our results argue for sparing community health centers and the  
17  
18 practitioners of FCM who work in them. As part of its crisis management, the Spanish  
19  
20 central government has recently increased physicians' legal work week from 35 to 37.5  
21  
22 hours, a measure that has sparked more than a few protests.<sup>59 60</sup> Ironically, this measure  
23  
24 will cut mostly into the incomes of non-FCM specialists who earned additional income  
25  
26 through after-hours private consultations and thus reduce the income disparity with FCM  
27  
28 physicians.  
29  
30  
31  
32  
33

34 As a separate policy instrument, the central government's Ministry of Health  
35  
36 could cautiously expand the number of approved post-graduate training positions in  
37  
38 FCM, which has recently become a limiting factor in the resurgence of this specialty  
39  
40 since 2008 (Figure 1). There is evidence that many residents already in training in FCM  
41  
42 have chosen to retake the national MIR exam and reenter the selection process as  
43  
44 candidatos despite the requirement that they abandon their current training position.<sup>38</sup> It is  
45  
46 conceivable that too large an excess of unfilled training slots in FCM could aggravate this  
47  
48 perverse incentive.  
49  
50  
51  
52  
53  
54  
55  
56  
57  
58  
59  
60

## Conclusions

In the midst of an ongoing economic crisis, the likelihood of obtaining employment has assumed critical importance as a determinant of specialty preference among Spanish medical students. Public policies that take advantage of the enhanced perceived job availability of FCM may be an effective way to steer medical school graduates into this specialty.

For peer review only

## Footnotes

### Contributors

All authors (JEH, BGL, VOR, PBP) contributed substantially to the conceptualization and design of the survey. JEH, BGL and PBP performed statistical analyses on the survey data. JEH and BGL wrote the initial drafts, while VOR and PBP made substantive changes to various drafts. All contributors approved the final version for publication.

### Acknowledgements

We gratefully acknowledge the research assistance of Teresa Suárez de Sousa.

### Competing Interests

All authors have completed the United Competing Interest form at [www.icmje.org/coi\\_disclosure.pdf](http://www.icmje.org/coi_disclosure.pdf) (available on request from the corresponding author) and declare that they have no competing interests.

### Funding

The Spanish Ministry of Science and Innovation, through Grant ECO2010-21558 to BGL as principal investigator, supported the development, execution and analysis of the survey described in this study.

### Copyright License

The Corresponding Author has the right to grant on behalf of all authors and does grant on behalf of all authors, an exclusive licence (or non exclusive for government

Specialty choice in times of economic crisis

2012-002051

1  
2  
3 employees) on a worldwide basis to the BMJ Publishing Group Ltd to permit this article  
4  
5 (if accepted) to be published in BMJ editions and any other BMJ PGL products and  
6  
7  
8 sublicences such use and exploit all subsidiary rights, as set out in our licence.  
9  
10

### 11 12 13 **Statement concerning Ethical Approval**

14  
15 No ethical approval was required for this research.  
16  
17

### 18 19 20 **Data Sharing Statement**

21  
22 The detailed results of all statistical analyses, including statistical code, are available  
23  
24 from the corresponding author at [jeffrey@mit.edu](mailto:jeffrey@mit.edu).  
25  
26  
27  
28  
29  
30  
31  
32  
33  
34  
35  
36  
37  
38  
39  
40  
41  
42  
43  
44  
45  
46  
47  
48  
49  
50  
51  
52  
53  
54  
55  
56  
57  
58  
59  
60

1  
2  
3  
4  
5  
6  
7  
8  
9  
10  
11  
12  
13  
14  
15  
16  
17  
18  
19  
20  
21  
22  
23  
24  
25  
26  
27  
28  
29  
30  
31  
32  
33  
34  
35  
36  
37  
38  
39  
40  
41  
42  
43  
44  
45  
46  
47  
48  
49  
50  
51  
52  
53  
54  
55  
56  
57  
58  
59  
60

For peer review only

Table 1. Seven survey questions on attributes of medical specialties<sup>a</sup>

|   | Attribute and Survey Text                                                                                                                                                                                                                               | FCM            | All Others     |
|---|---------------------------------------------------------------------------------------------------------------------------------------------------------------------------------------------------------------------------------------------------------|----------------|----------------|
|   |                                                                                                                                                                                                                                                         | Mean<br>S.D.   | Mean<br>S.D.   |
| 1 | <i>Probability of Obtaining Employment.</i> “How would you rate the probability of obtaining work in the next three years, whether in the public or private sector, for an individual who became certified in this specialty today? (0 to 100 percent)” | 83.98<br>19.89 | 64.78<br>23.92 |
| 2 | <i>Lifestyle &amp; Work Hours.</i> “Work hours, working conditions, and the ability to reconcile work with family life. (0 to 10, 0 = very bad, 10 = very good)”                                                                                        | 7.78<br>2.09   | 6.78<br>2.25   |
| 3 | <i>Recognition by Patients.</i> “Recognition of professional work on the part of patients. (0 to 10)”                                                                                                                                                   | 5.92<br>2.60   | 6.34<br>2.73   |
| 4 | <i>Prestige among Colleagues.</i> “Prestige and recognition among colleagues as well as social recognition. (0 to 10)”                                                                                                                                  | 3.92<br>2.28   | 6.30<br>2.52   |
| 5 | <i>Opportunity for Professional Development.</i> “Possibility of promotion or future professional development within the specialty (new fields, new techniques, scientific advances). (0 to 10)”                                                        | 5.11<br>2.30   | 7.20<br>2.15   |
| 6 | <i>Annual Remuneration with 10–15 Years Experience.</i> “Estimate the current average annual gross remuneration (public and private combined) of a specialist with 10–15 years of experience. (Thousands of euros)” <sup>b</sup>                        | 60.00<br>0.16  | 86.56<br>31.96 |
| 7 | <i>Proportion of Compensation from Private Practice.</i> “What percentage of this remuneration (including public and private) do you believe comes from private practice? (0 to 100 percent)” <sup>b</sup>                                              | 0.00<br>0.00   | 39.32<br>23.40 |

a. The introductory text was, “In this section, you’ll define your profile of some medical specialties, including the one that you’ve just chosen as your first choice as well as others chosen at random. Think about your *perceptions and expectations* concerning each specialty.”

b. The preamble to the two questions on attributes 6 and 7 was: “The following questions are about compensation. To facilitate your responses, recall that the average annual gross income of a full-time specialist in Family & Community Medicine with 10–15 years experience is currently about 60,000 euros.”

Table 2. Mixed Multinomial Logit Regression Results<sup>a</sup>

| Explanatory Variable                                                   | Model 1                  | Model 2                  | Model 3                  | Model 4                  |
|------------------------------------------------------------------------|--------------------------|--------------------------|--------------------------|--------------------------|
| 1. <i>Probability of Obtaining Employment<sup>b</sup></i>              | 1.324<br>[1.263 , 1.388] | 1.346<br>[1.278 , 1.418] | 1.339<br>[1.271 , 1.412] | 1.337<br>[1.272 , 1.405] |
| 2. <i>Lifestyle &amp; Work Hours</i>                                   | 0.905<br>[0.867 , 0.944] | 0.901<br>[0.852 , 0.952] | 0.891<br>[0.843 , 0.943] | 0.907<br>[0.860 , 0.957] |
| Population Standard Deviation                                          |                          | 0.288<br>[0.161 , 0.415] | 0.282<br>[0.155 , 0.409] | 0.301<br>[0.182 , 0.419] |
| 3. <i>Recognition by Patients</i>                                      | 1.105<br>[1.055 , 1.157] | 1.118<br>[1.064 , 1.176] | 1.116<br>[1.061 , 1.173] | 1.098<br>[1.047 , 1.151] |
| 4. <i>Prestige among Colleagues</i>                                    | 1.082<br>[1.024 , 1.143] | 1.096<br>[1.033 , 1.163] | 1.110<br>[1.046 , 1.179] | 1.062<br>[1.005 , 1.121] |
| 5. <i>Opportunity for Professional Development</i>                     | 1.326<br>[1.254 , 1.403] | 1.347<br>[1.267 , 1.432] | 1.347<br>[1.265 , 1.433] | 1.303<br>[1.229 , 1.381] |
| 6. <i>Annual Remuneration with 10–15 Years Experience<sup>c</sup></i>  | 0.821<br>[0.782 , 0.863] | 0.812<br>[0.770 , 0.856] | 1.062<br>[0.701 , 1.610] |                          |
| Interaction: <i>Female Gender</i>                                      |                          |                          | 0.884<br>[0.817 , 0.957] |                          |
| Interaction: <i>Concordance with Favorite Specialty<sup>d</sup></i>    |                          |                          | 0.885<br>[0.815 , 0.962] |                          |
| Interaction: <i>Age (Years)</i>                                        |                          |                          | 0.995<br>[0.978 , 1.012] |                          |
| 7. <i>Proportion of Compensation from Private Practice<sup>b</sup></i> | 1.195<br>[1.139 , 1.255] | 1.210<br>[1.148 , 1.276] | 1.218<br>[1.154 , 1.285] | 1.071<br>[1.028 , 1.116] |
| Number of respondents <sup>e</sup>                                     | 836                      | 836                      | 818                      | 887                      |
| Number of observations <sup>f</sup>                                    | 4,839                    | 4,839                    | 4,738                    | 5,184                    |

a. The coefficients represent the effect of a unit change in the independent variable on the odds of preferring a specialty. Numbers in brackets below each coefficient are 95% confidence intervals.

b. Attribute values normalized to range from 0 to 10, so that each unit corresponds to 10 percent.

c. Attribute values normalized so that each unit corresponds to €10,000.

d. Binary variable equal to 1 when the student's preferred specialty is also his favorite specialty.

e. Number of students with data on all explanatory variables in the model.

f. Number of specialty choices with data on all explanatory variables in the model.



## Figure Legends

**Figure 1. Percentage of Candidates Participating in the Annual Internship-Residency (“MIR”) Selection Process Who Elected a Training Position in Family and Community Medicine, 1996–2012.** Adjacent to each point is the total number of candidates participating in the MIR selection process in the corresponding year. *Source:* Compiled from annual data provided by the Ministerio de Sanidad y Política Social, Subdirección General de Ordenación Profesional, Spain.

**Figure 2. Effect of a 1-point increment in *Lifestyle & Work Hours* rating on odds ratio of preferring a specialty.** We used the results of Model 4 to compute the predicted effect for each individual student of a 1-point increment in attribute 2 (Lifestyle & Work Hours). Each open point in the figure represents one student. The points are arranged in rows corresponding to the student’s preferred specialty. The horizontal axis gauges the predicted effect of a 1-point increment a 10-point scale of favorable lifestyle and work hours. The solid blue squares represent the population mean effect for students in each preferred specialty. Not shown are preferred specialties with fewer than 10 respondents.

**Figure 3. Concordance of preferred with favorite specialty.** For each preferred specialty, the black points show the proportion of students who also designated that specialty as their favorite.

**Figure 4. Median predicted probability of specialty preference in relation to the median specialty ranking in the 2012 MIR selection process.** CALM = Clinical Analysis & Laboratory Medicine. CN = Clinical Neurophysiology. ENT = Otorhinolaryngology. FCM = Family and Community Medicine. Ob-Gyn = Obstetrics & Gynecology. PMPH = Preventive Medicine & Public Health. RM = Rehabilitation Medicine.

## References

1. Schwartz RW, Haley JV, Williams C, et al. The controllable lifestyle factor and students' attitudes about specialty selection. *Acad Med* 1990;65(3):207-10.
2. Kassler WJ, Wartman SA, Silliman RA. Why medical students choose primary care careers. *Acad Med* 1991;66(1):41-3.
3. Hurley JE. Physicians' Choices of Specialty, Location, and Mode: A Reexamination within an Interdependent Decision Framework. *Journal of Human Resources* 1991;26(1):47-71.
4. Fincher RM, Lewis LA, Rogers LQ. Classification model that predicts medical students' choices of primary care or non-primary care specialties. *Acad Med* 1992;67(5):324-7.
5. Osborn EH. Factors influencing students' choices of primary care or other specialties. *Acad Med* 1993;68(7):572-4.
6. Rosenthal MP, Diamond JJ, Rabinowitz HK, et al. Influence of income, hours worked, and loan repayment on medical students' decision to pursue a primary care career. *JAMA* 1994;271(12):914-7.
7. Burack JH, Irby DM, Carline JD, et al. A study of medical students' specialty-choice pathways: trying on possible selves. *Acad Med* 1997;72(6):534-41.
8. Thornton J. Physician choice of medical specialty: do economic incentives matter? *Applied Economics* 2000;32(11):1419-28.
9. Gelfand DV, Podnos YD, Wilson SE, et al. Choosing general surgery: insights into career choices of current medical students. *Arch Surg* 2002;137(8):941-5; discussion 45-7.

10. Nicholson S. Physician Specialty Choice under Uncertainty. *Journal of Labor Economics* 2002;20(4):816-47.
11. Dorsey ER, Jarjoura D, Rutecki GW. Influence of controllable lifestyle on recent trends in specialty choice by US medical students. *JAMA* 2003;290(9):1173-8.
12. Thornton J, Esposto F. How important are economic factors in choice of medical specialty? *Health Econ* 2003;12(1):67-73.
13. Azizzadeh A, McCollum CH, Miller CC, et al. Factors influencing career choice among medical students interested in surgery. *Curr Surg* 2003;60(2):210-3.
14. Wright B, Scott I, Woloschuk W, et al. Career choice of new medical students at three Canadian universities: family medicine versus specialty medicine. *CMAJ* 2004;170(13):1920-4.
15. Harris MG, Gavel PH, Young JR. Factors influencing the choice of specialty of Australian medical graduates. *Med J Aust* 2005;183(6):295-300.
16. Cochran A, Melby S, Neumayer LA. An Internet-based survey of factors influencing medical student selection of a general surgery career. *Am J Surg* 2005;189(6):742-6.
17. Gagne R, Leger PT. Determinants of physicians' decisions to specialize. *Health Econ* 2005;14(7):721-35.
18. Kutob RM, Senf JH, Campos-Outcalt D. The diverse functions of role models across primary care specialties. *Fam Med* 2006;38(4):244-51.
19. Sanfey HA, Saalwachter-Schulman AR, Nyhof-Young JM, et al. Influences on medical student career choice: gender or generation? *Arch Surg* 2006;141(11):1086-94; discussion 94.

- 1  
2  
3  
4  
5  
6  
7  
8  
9  
10  
11  
12  
13  
14  
15  
16  
17  
18  
19  
20  
21  
22  
23  
24  
25  
26  
27  
28  
29  
30  
31  
32  
33  
34  
35  
36  
37  
38  
39  
40  
41  
42  
43  
44  
45  
46  
47  
48  
49  
50  
51  
52  
53  
54  
55  
56  
57  
58  
59  
60
20. Lambert TW, Goldacre MJ, Turner G. Career choices of United Kingdom medical graduates of 2002: questionnaire survey. *Med Educ* 2006;40(6):514-21.
21. Horn L, Tzanetos K, Thorpe K, et al. Factors associated with the subspecialty choices of internal medicine residents in Canada. *BMC Med Educ* 2008;8:37.
22. Hauer KE, Durning SJ, Kernan WN, et al. Factors associated with medical students' career choices regarding internal medicine. *JAMA* 2008;300(10):1154-64.
23. Scott IM, Matejcek AN, Gowans MC, et al. Choosing a career in surgery: factors that influence Canadian medical students' interest in pursuing a surgical career. *Can J Surg* 2008;51(5):371-7.
24. West CP, Drefahl MM, Popkave C, et al. Internal medicine resident self-report of factors associated with career decisions. *J Gen Intern Med* 2009;24(8):946-9.
25. Bennett KL, Phillips JP. Finding, recruiting, and sustaining the future primary care physician workforce: a new theoretical model of specialty choice process. *Acad Med* 2010;85(10 Suppl):S81-8.
26. Goldacre MJ, Laxton L, Lambert TW. Medical graduates' early career choices of specialty and their eventual specialty destinations: UK prospective cohort studies. *BMJ* 2010;341:c3199.
27. Lefevre JH, Roupret M, Kerneis S, et al. Career choices of medical students: a national survey of 1780 students. *Med Educ* 2010;44(6):603-12.
28. Fukuda Y, Harada T. Gender differences in specialty preference and mismatch with real needs in Japanese medical students. *BMC Med Educ* 2010;10:15.
29. Glynn RW, Kerin MJ. Factors influencing medical students and junior doctors in choosing a career in surgery. *Surgeon* 2010;8(4):187-91.

- 1  
2  
3  
4  
5  
6  
7  
8  
9  
10  
11  
12  
13  
14  
15  
16  
17  
18  
19  
20  
21  
22  
23  
24  
25  
26  
27  
28  
29  
30  
31  
32  
33  
34  
35  
36  
37  
38  
39  
40  
41  
42  
43  
44  
45  
46  
47  
48  
49  
50  
51  
52  
53  
54  
55  
56  
57  
58  
59  
60
30. Bindal T, Wall D, Goodyear HM. Medical students' views on selecting paediatrics as a career choice. *Eur J Pediatr* 2011;170(9):1193-9.
31. Heikkila T, Hyppola H, Kumpusalo E, et al. Choosing a medical specialty--study of Finnish doctors graduating in 1977-2006. *Med Teach* 2011;33(8):e440-5.
32. Scott I, Gowans M, Wright B, et al. Determinants of choosing a career in family medicine. *CMAJ* 2011;183(1):E1-8.
33. Kiolbassa K, Miksch A, Hermann K, et al. Becoming a general practitioner--which factors have most impact on career choice of medical students? *BMC Fam Pract* 2011;12:25.
34. Ravindra P, Fitzgerald JE. Defining surgical role models and their influence on career choice. *World J Surg* 2011;35(4):704-9.
35. Sivey P, Scott A, Witt J, et al. Junior doctors' preferences for specialty choice. *J Health Econ* 2012;31(6):813-23.
36. Gaucher S, Thabut D. [Medical specialty choice: What impact of teaching? Results of a survey of two medical schools.]. *Presse Med* 2012.
37. Mena G, Lluvia A, Sequera VG, et al. [Specialized health education: medical students' preferences and perceptions.]. *Med Clin (Barc)* 2012.
38. Gonzalez Lopez-Valcarcel B, Barber Perez P, Ortun Rubio V. ¿Por qué los médicos huyen y rehúyen la Medicina de Familia? Datos y claves sobre el problema en busca de soluciones. In: Ortún V, editor. *La refundación de la Atención Primaria*. Madrid: Springer Healthcare, 2011.
39. González López-Valcárcel B, Barber Pérez P. Planificación y formación de profesionales sanitarios, con foco en la atención primaria. Informe SESPAS 2012.

1  
2  
3 *Gaceta Sanitaria* 2012;published online 27-Jan-2012.

4  
5  
6 doi:10.1016/j.gaceta.2011.07.029.

7  
8 40. Ministerio de Sanidad y Política Social. Orden SAS/2448/2010, de 15 de septiembre,  
9  
10 por la que se aprueba la convocatoria de pruebas selectivas 2010 para el acceso en el  
11  
12 año 2011, a plazas de formación sanitaria especializada para Médicos... *Boletín*  
13  
14 *Oficial del Estado* 2010;230(Sec. II.B.):80254-449.

15  
16  
17 41. Servicio Público de Empleo Estatal (SEPE). *Información mensual de mercado de*  
18  
19 *trabajo de titulados universitarios*. Madrid: Feb, 2010.

20  
21  
22 42. Balsells F, Visa L. El recorte en sanidad alcanza las urgencias del hospital de  
23  
24 l'Esperança: Salud decidirá antes del 22 de abril los recortes en personal, camas y  
25  
26 servicios. *El País* 2011;1 April.

27  
28  
29 43. Servicio Público de Empleo Estatal (SEPE). *Información mensual de mercado de*  
30  
31 *trabajo de titulados universitarios*. Madrid: April, 2012.

32  
33  
34 44. Train K. *Discrete Choice Methods With Simulation, 2nd Edition*. New York:  
35  
36 Cambridge University Press, 2009.

37  
38  
39 45. Hole AR. Modelling heterogeneity in patients' preferences for the attributes of a  
40  
41 general practitioner appointment. *J Health Econ* 2008;27(4):1078-94.

42  
43  
44 46. Hosmer DW, Hosmer T, Le Cessie S, Lemeshow S. A comparison of goodness-of-fit  
45  
46 tests for the logistic regression model. *Stat Med* 1997;16(9):965-80.

47  
48  
49 47. Kongsved SM, Basnov M, Holm-Christensen K, et al. Response rate and  
50  
51 completeness of questionnaires: a randomized study of Internet versus paper-and-  
52  
53 pencil versions. *J Med Internet Res* 2007;9(3):e25.

- 1  
2  
3  
4  
5  
6  
7  
8  
9  
10  
11  
12  
13  
14  
15  
16  
17  
18  
19  
20  
21  
22  
23  
24  
25  
26  
27  
28  
29  
30  
31  
32  
33  
34  
35  
36  
37  
38  
39  
40  
41  
42  
43  
44  
45  
46  
47  
48  
49  
50  
51  
52  
53  
54  
55  
56  
57  
58  
59  
60
48. Compton MT, Frank E, Elon L, et al. Changes in U.S. medical students' specialty interests over the course of medical school. *J Gen Intern Med* 2008;23(7):1095-100.
49. Kazerooni EA, Blane CE, Schlesinger AE, et al. Medical students' attitudes toward radiology: comparison of matriculating and graduating students. *Acad Radiol* 1997;4(8):601-7.
50. West CP, Popkave C, Schultz HJ, et al. Changes in career decisions of internal medicine residents during training. *Ann Intern Med* 2006;145(10):774-9.
51. Leo J. España supera la barrera de los 2.000 médicos en paro *Redacción Médica* 2012;Jun 4.
52. Sivey P, Scott A, Witt J, et al. *Why Junior Doctors Don't Want to Become General Practitioners: A Discrete Choice Experiment from the MABEL Longitudinal Study of Doctors*. Melbourne: University of Melbourne, Melbourne Institute Working Paper No. 17/10, 2010.
53. Simoens S, Hurst J. *The supply of physician services in OECD countries*. Paris: OECD Directorate for Employment, Labour and Social Affairs, Health Working Papers No. 21, 2006.
54. Nicholson S. How Much Do Medical Students Know about Physician Income? *Journal of Human Resources* 2005;40(1):100-14.
55. OECD. 3. Health Workforce: 3.4 Remuneration of doctors (general practitioners and specialists). *Health at a Glance 2011: OECD Indicators*, 2012:66-67.
56. Ubach C, Scott A, French F, et al. What do hospital consultants value about their jobs? A discrete choice experiment. *BMJ* 2003;326(7404):1432.

- 1  
2  
3  
4  
5  
6  
7  
8  
9  
10  
11  
12  
13  
14  
15  
16  
17  
18  
19  
20  
21  
22  
23  
24  
25  
26  
27  
28  
29  
30  
31  
32  
33  
34  
35  
36  
37  
38  
39  
40  
41  
42  
43  
44  
45  
46  
47  
48  
49  
50  
51  
52  
53  
54  
55  
56  
57  
58  
59  
60
57. Scott A. Eliciting GPs' preferences for pecuniary and non-pecuniary job characteristics. *J Health Econ* 2001;20(3):329-47.
58. Gunther OH, Kurstein B, Riedel-Heller SG, et al. The role of monetary and nonmonetary incentives on the choice of practice establishment: a stated preference study of young physicians in Germany. *Health Serv Res* 2010;45(1):212-29.
59. Sevillano EG. Los médicos denuncian que la jornada de 37,5 horas les ha restado nómina. *El País* 2012;25 April.
60. Blasco P. Los médicos denuncian que, además de ampliar su horario, pierden sueldo. *El Mundo* 2012;23-Apr.



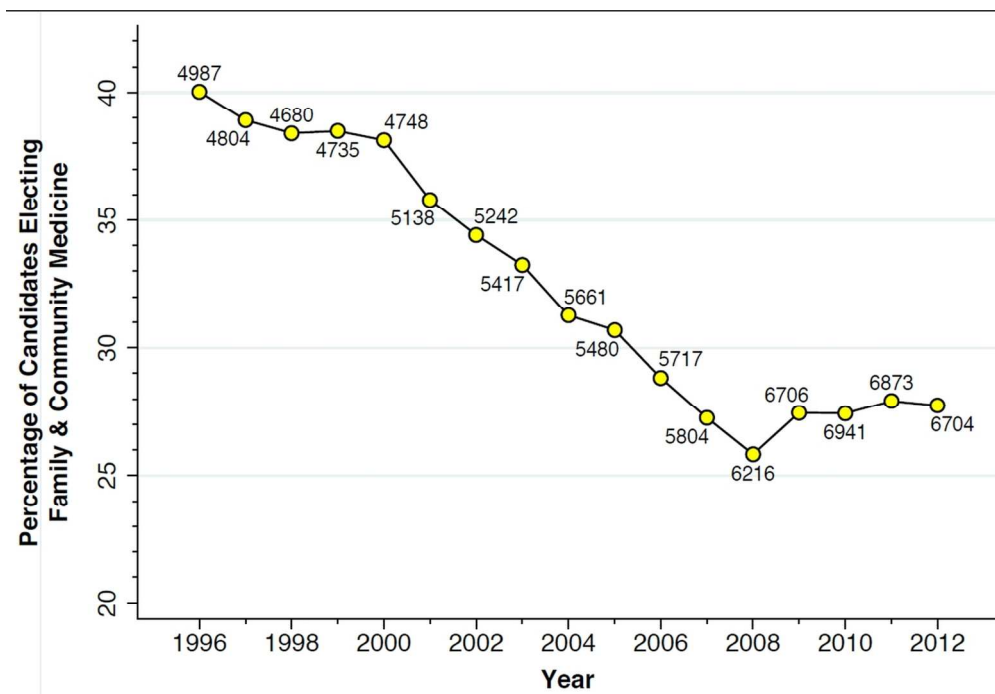

Percentage of Candidates Participating in the Annual Internship-Residency ("MIR") Selection Process Who Elected a Training Position in Family and Community Medicine, 1996–2012. Adjacent to each point is the total number of candidates participating in the MIR selection process in the corresponding year. Source: Compiled from annual data provided by the Ministerio de Sanidad y Política Social, Subdirección General de Ordenación Profesional, Spain  
130x90mm (300 x 300 DPI)

Peer Review Only

1  
2  
3  
4  
5  
6  
7  
8  
9  
10  
11  
12  
13  
14  
15  
16  
17  
18  
19  
20  
21  
22  
23  
24  
25  
26  
27  
28  
29  
30  
31  
32  
33  
34  
35  
36  
37  
38  
39  
40  
41  
42  
43  
44  
45  
46  
47  
48  
49  
50  
51  
52  
53  
54  
55  
56  
57  
58  
59  
60

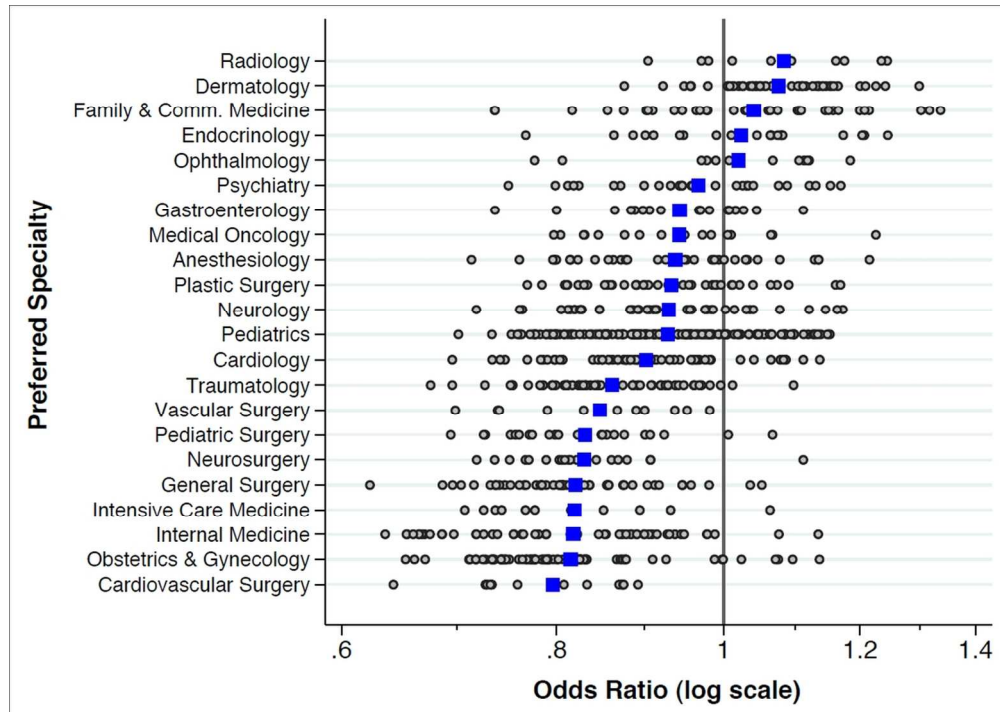

Effect of a 1-point increment in Lifestyle & Work Hours rating on odds ratio of preferring a specialty. Each point corresponds to an individual student. The points are classified by the student's preferred specialty. The blue squares show the mean effect for each preferred specialty. Not shown are preferred specialties with fewer than 10 respondents.  
125x90mm (300 x 300 DPI)

Peer Review Only

1  
2  
3  
4  
5  
6  
7  
8  
9  
10  
11  
12  
13  
14  
15  
16  
17  
18  
19  
20  
21  
22  
23  
24  
25  
26  
27  
28  
29  
30  
31  
32  
33  
34  
35  
36  
37  
38  
39  
40  
41  
42  
43  
44  
45  
46  
47  
48  
49  
50  
51  
52  
53  
54  
55  
56  
57  
58  
59  
60

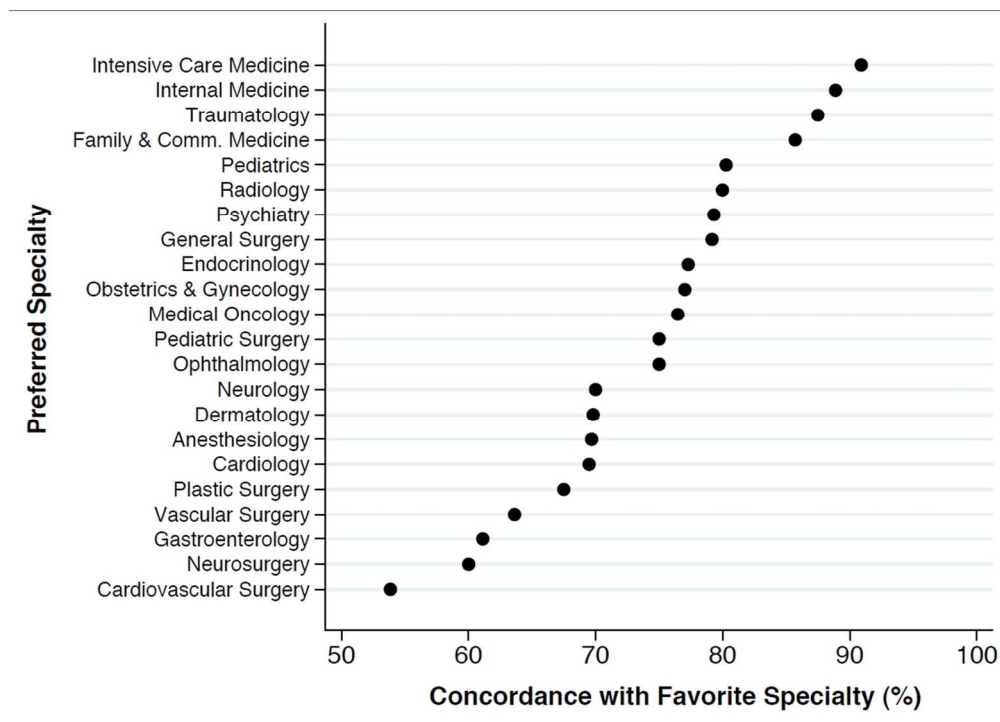

Concordance of preferred with favorite specialty. For each preferred specialty, the black points show the proportion of students who also designated that specialty as their favorite.  
125x90mm (300 x 300 DPI)

Review only

1  
2  
3  
4  
5  
6  
7  
8  
9  
10  
11  
12  
13  
14  
15  
16  
17  
18  
19  
20  
21  
22  
23  
24  
25  
26  
27  
28  
29  
30  
31  
32  
33  
34  
35  
36  
37  
38  
39  
40  
41  
42  
43  
44  
45  
46  
47  
48  
49  
50  
51  
52  
53  
54  
55  
56  
57  
58  
59  
60

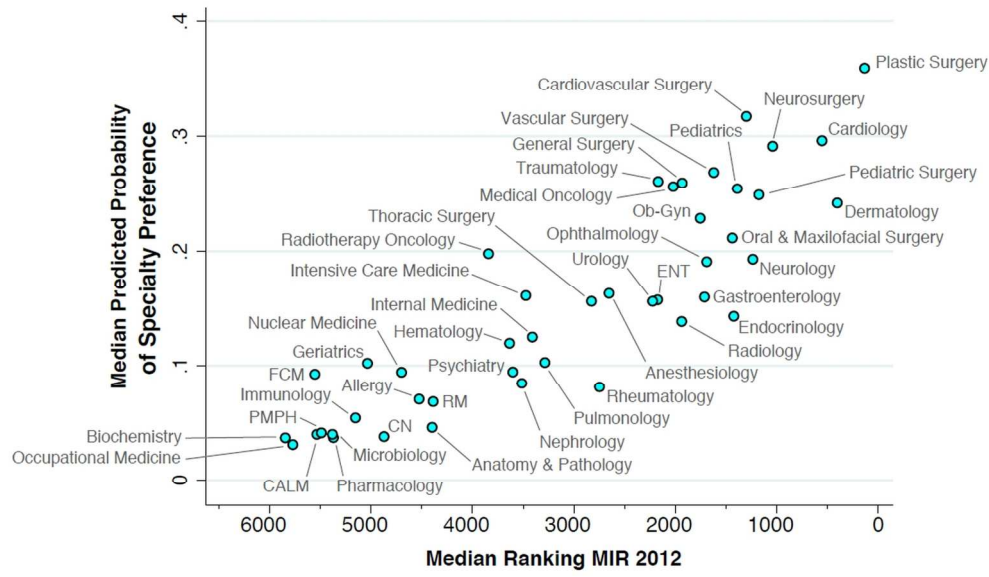

Median predicted probability of specialty preference in relation to the median specialty ranking in the 2012 MIR selection process. CALM = Clinical Analysis & Laboratory Medicine. CN = Clinical Neurophysiology. ENT = Otorhinolaryngology. FCM = Family and Community Medicine. Ob-Gyn = Obstetrics & Gynecology. PMPH = Preventive Medicine & Public Health. RM = Rehabilitation Medicine.  
152x90mm (300 x 300 DPI)

Review only

Specialty choice in times of economic crisis

2012-002051

Formatted: Left: 1.25", Right: 1.25", Footer distance from edge: 0.5"

## Specialty choice in times of economic crisis: cross-sectional survey of Spanish medical students

Jeffrey E. Harris\*

Professor, Department of Economics  
Massachusetts Institute of Technology, Cambridge, Massachusetts MA 02139, USA

Beatriz González López-Valcárcel

Profesora, Departamento de Métodos Cuantitativos en Economía y Gestión  
Universidad de Las Palmas de Gran Canaria, Las Palmas de Gran Canaria 35017, Spain

Vicente Ortún Rubio

Decano, Facultad de Ciencias Económicas y Empresariales,  
Universitat Pompeu Fabra, Barcelona 08002, Spain

Patricia Barber Pérez

Profesora, Departamento de Métodos Cuantitativos en Economía y Gestión  
Universidad de Las Palmas de Gran Canaria, Las Palmas de Gran Canaria 35017, Spain

\*Corresponding author: jeffrey@mit.edu

January 8, 2013

TRACKED CHANGES VERSION

1

Specialty choice in times of economic crisis

2012-002051

## Abstract

**Objective.** To investigate the determinants of specialty choice among graduating medical students in Spain, ~~a country that entered into a severe, ongoing economic crisis in 2008.~~

**Setting.** Since 2008, ~~when Spain entered into a severe, ongoing economic crisis,~~ the percentage of Spanish medical school graduates electing Family and Community Medicine (FCM) has experienced a reversal after more than a decade of decline.

**Design.** Nationwide cross-sectional survey ~~of all Spanish medical schools~~ conducted online in April 2011.

**Participants.** ~~We invited all students in their final year before graduation from each of Spain's 27 public and private medical schools to participate. 978 responding medical students in their last year before graduation.~~

**Main outcome measures.** Respondents' preferred specialty in relation to their perceptions of: (1) the probability of obtaining employment; (2) lifestyle and work hours; (3) recognition by patients; (4) prestige among colleagues; (5) opportunity for professional development; (6) annual remuneration; and (7) the proportion of the physician's compensation from private practice.

**Results.** ~~978 medical students (25% of the nationwide population of students in their final year) participated. Job security~~ Perceived job availability had the largest impact on specialty preference. Each 10-percent increment in the probability of obtaining employment increased the odds of preferring a specialty by 33.7 percent (95% CI, 27.2% – 40.5%). ~~Job security-availability~~ was 4 times as important as compensation from private practice in determining specialty choice (95% CI, 1.7–6.8). We observed considerable heterogeneity in the influence of life style and work hours, with students

January 8, 2013

TRACKED CHANGES VERSION

2

Specialty choice in times of economic crisis

2012-002051

who preferred such specialties as Cardiovascular Surgery and Obstetrics & Gynecology valuing longer, rather than shorter workdays.

**Conclusions.** In the midst of an ongoing economic crisis, job ~~security-availability~~ has assumed critical importance as a determinant of specialty preference among Spanish medical students. In view of the shortage of practitioners of Family and Community Medicine, Public-public policies that take advantage of the enhanced perceived job ~~security-availability~~ of FCM may help steer medical school graduates into this specialty.

### Introduction

During the past two decades, researchers have carried out numerous studies of the determinants of specialty choice.<sup>1-37,28</sup> While most have been conducted in the United States,<sup>1-13 16 18 19 22 24 25 1-13 16 18 19 22 24 26</sup> others have addressed the determinants of specialization in Canada,<sup>14 17 21 23 32 14 17 21 23</sup> Australia,<sup>15 35 15 25</sup> the United Kingdom,<sup>20 26 30</sup> ~~34 20 27~~ Ireland,<sup>29</sup> France,<sup>27 36</sup> Finland,<sup>31</sup> Germany,<sup>33</sup> Spain,<sup>37</sup> and Japan.<sup>28,28</sup> In view of growing concerns about a shortage of generalists, many studies have focused on the decision to seek a career in primary care,<sup>2 4-6 18 25 2 4-6 18 26</sup> family medicine,<sup>14 32 14</sup> general practice,<sup>15 20 33 35 15 20 25</sup> internal medicine,<sup>22 24 22 24</sup> pediatrics,<sup>30</sup> and general surgery.<sup>9 13 16 19</sup>  
~~23 29 34 9 13 16 19 23~~

An extensive list of factors influencing specialty choice has been considered, including: financial remuneration,<sup>1-6 8-15 17 19 24 35 1-6 8-15 17 19 24 25</sup> life style and work hours,<sup>1 2 4-16 19 21-24 29 33 35-37 1-2 4-16 19 21-25</sup> prestige among colleagues or the general public,<sup>1-5 9 10 13-15 19 25 37 1-5 9 10 13-15 19 26</sup> mentors and other role models,<sup>1 5 7 15 16 18 19 21 23 31 34 36 1-5 7 15 16 18 19 21 23</sup> ~~32-33~~ the length of the residency training program,<sup>1 3 5 12 13 15 16 32 1-3 5 12 13 15 16</sup> the clinical

**Formatted:** Do not check spelling or grammar, Superscript

January 8, 2013

TRACKED CHANGES VERSION

3

Specialty choice in times of economic crisis

2012-002051

clerkship experience in medical school,<sup>1,5,13,15,16,19,21,22,25,30,4,5,13,15,16,19,21,22,26</sup> direct patient interaction and continuity of care,<sup>2,4,9,10,13,24,27,32,33,35,2,4,9,10,13,24,25</sup> debt upon graduation,<sup>5,6,8,13,15,16,22,25,5,6,8,13,15,16,22,26</sup> research and teaching opportunities,<sup>2,5,10,14,15,35,5,10,14,15,25</sup> potential for career advancement,<sup>13,15,29,31,13,15</sup> influence of parents, relatives and peers,<sup>4,5,15,32,4,5,15</sup> malpractice litigation risk,<sup>8,9,15,8,9,15</sup> opportunity to perform procedures or work with new technology,<sup>2,5,15,21,23,2,5,15,21,23</sup> intellectual challenge,<sup>7,9,7,9</sup> and hospital versus ambulatory orientation.<sup>2,23,2,23</sup> Gender differences in the importance of these factors have also been studied.<sup>8,19,21,27,29,8,19,21,28</sup> ~~In the one study that considered job security, no significant effect was found.<sup>9</sup>~~

~~In the present study, we examine the determinants of specialty choice in Spain while the country remains in the midst of a severe financial crisis that began in late 2007. In a 2011, we conducted a cross-sectional survey of Spanish medical students in their final year before electing a specialty training program, we confirm the importance of such factors as prestige, opportunity for professional development, and private sector remuneration. In view of the severe, ongoing economic crisis that began in late 2008. But we also find studied whether that job security the likelihood of obtaining employment has had assumed a key role in determining specialty preference.~~

### Spain's Healthcare System and the Financial Crisis

The Spanish healthcare system is dominated by the public sector. In 2009, total healthcare expenditures constituted 9.5% of GDP, of which only 2.5% was privately financed. The vast majority of physicians are employees of the public sector, where salaries are fixed by separate negotiations between unions of healthcare workers and the

January 8, 2013

TRACKED CHANGES VERSION

4



Specialty choice in times of economic crisis

2012-002051

governments of each of Spain's 17 autonomous communities. Physicians in many specialties have opportunities to earn additional income in the private sector, either by treating paying patients in their own ~~consultancies-private practices~~ or by performing consults on inpatients while on call ~~via on-call coverage (termed guardias)~~ at private hospitals. However, ~~such opportunities are not available~~ there is essentially no such demand for specialists in Family and Community Medicine (FCM), who work almost exclusively as full-time employees of health centers.

Medical specialization in Spain is governed by a system widely known as MIR, which stands for Médico Interno Residente, literally "resident medical intern."<sup>38,39,29,30</sup> On an annual basis, the central government's Ministry of Health authorizes post-graduate training programs in 47 different specialties, imposing limits on the number of positions (plazas) in each program. Each medical school graduate (candidato) seeking a training position is ranked on the basis of his academic transcript and his score on the annual nationwide MIR examination. In a sequential process, the top-ranked applicant first chooses from all available training programs, after which each successively ranked candidate is permitted to choose from the remaining available training slots. In the 2011 MIR cycle, for example, the Ministry of Health authorized 6,881 positions in 560 training centers throughout the country.<sup>40,31</sup> A total of 6,873 applicants accepted training positions through the sequential selection process.

Unemployment among graduates of Spanish medical schools was a relatively rare phenomenon until the financial crisis erupted in late ~~2007~~2008. With real gross domestic product in decline, the nationwide unemployment exceeding 10 percent and heading toward 20 percent, and interest rates on Spanish sovereign debt approaching record highs,

January 8, 2013

TRACKED CHANGES VERSION

5

Specialty choice in times of economic crisis

2012-002051

federal and regional governments began to engage in increasingly severe budgetary cutbacks. The healthcare sector was not immune from ~~increasingly severe~~ governmental~~these~~ budgetary ~~cutbacks in the ensuing years~~cuts. While established physicians with seniority had essentially lifetime government jobs, many younger graduates were compelled to accept contingent employment contracts. Still others could not find work at all. By February 2010, the number of ~~laid-off~~out-of-work physicians nationwide had for the first time crossed the psychological threshold of 1,000.<sup>4132</sup> In the spring of 2011, when the survey described in this report was in the field, there were prominent headlines about personnel cuts in the health budgets of many autonomous communities, notably Catalonia.<sup>4233</sup> By April 2012, with increasing austerity measures, the number of unemployed physicians had broken the 2,000 barrier.<sup>4334</sup>

There is presumptive evidence that the financial crisis has had a significant effect on the career choices of recent medical school graduates. As Figure 1 indicates, the percentage of candidates participating in the annual MIR selection process who elected a training position in Family and Community Medicine underwent an abrupt reversal after 2008. For the past three years (2010–2012), the number of candidates electing FCM has been limited by the number of available training positions, whereas during 2006–2009, some training positions in FCM remained unfilled.

## Subjects and Methods

### Cross-sectional survey

In April 2011, with the assistance of professors, deans and student associations, we invited all students in their final year in each of the 27 medical schools of Spain to

January 8, 2013

TRACKED CHANGES VERSION

6

Specialty choice in times of economic crisis

2012-002051

1  
2  
3  
4  
5  
6  
7  
8 participate in a survey of career preferences. ~~Students were not contacted individually.~~  
9  
10 ~~Instead, posters advertising the survey and directing students to the survey web site were~~  
11 ~~posted on every medical school campus. Participants were eligible to win a lottery prize.~~  
12  
13 ~~Participation in the survey was voluntary, and anonymity was assured. Out of a total~~  
14 ~~population of 3,874 registered sixth-year medical students nationwide, we received 978~~  
15 ~~responses (or 25%).~~ With the exception of students at the University of Las Palmas de  
16  
17 Gran Canaria, who took the electronic survey as a classroom-based pilot, all respondents  
18  
19 completed the survey online. ~~The response rate varied among medical schools, but there~~  
20  
21 ~~were no significant differences in the gender or age composition of the respondents and~~  
22 ~~the entire nationwide population (survey respondents: 71% female, mean age 24.1 years;~~  
23 ~~nationwide population of sixth-year students: 71% female, mean age 24.7 years).~~  
24  
25 ~~Participation in the survey was voluntary, and anonymity was assured. A brief description~~  
26  
27 ~~of the survey methods, along with some preliminary tabulations, have been reported~~  
28  
29 ~~elsewhere.<sup>29</sup>~~  
30  
31  
32  
33  
34  
35  
36

### 37 Survey questionnaire

38  
39 The electronic survey questionnaire contained three blocks: (1) personal data (age, sex,  
40  
41 nationality, residential postal code, university, anticipated date of graduation, and how  
42  
43 many parents or grandparents were physicians); (2) questions eliciting preferences among  
44  
45 the 47 specialties in Spain's MIR system of postgraduate training; and (3) questions  
46  
47 eliciting perceptions and expectations concerning these specialties.

48  
49 In the second block, in particular, each student was first asked to designate his  
50  
51 *preferred specialty*, that is, which specialty he would choose in the annual MIR selection  
52  
53  
54

55 January 8, 2013

TRACKED CHANGES VERSION

7

Specialty choice in times of economic crisis

2012-002051

process if he faced no restrictions as a result of his academic performance or his score on the nationwide exam. Each student was then asked to designate his *favorite specialty*, that is, which specialty he enjoyed the most, without regard to remuneration or working conditions (“Sin tener en cuenta los aspectos económicos, condiciones laborales, etc., ¿cuál es la especialidad que más te gusta?”). ~~Among the 978 medical students responding to the survey, 892 (91.2%) designated a preferred specialty, of whom 836 (93.7%) also designated a favorite specialty.~~

In the third block, each student was presented with seven questions concerning each specialty within a limited menu of six specialties. The menu included the preferred specialty he had just chosen in the second block, the specialty of Family and Community Medicine, and four other specialties chosen at random from four balanced subsets. Each subset contained medical, surgical and diagnostic specialties, with one specialty in each quartile of the global ranking of specialties observed in the MIR 2010 selection cycle.<sup>3829</sup>

The seven questions, whose translated text appears in Table 1, addressed the following attributes of each specialty: (1) the probability of obtaining employment; (2) lifestyle and work hours; (3) recognition by patients; (4) prestige among colleagues; (5) opportunity for professional development; (6) annual remuneration for a physician with 10–15 years experience; and (7) the proportion of the physician’s compensation from private practice. Four of the attributes (2, 3, 4 and 5) were measured on a 10-point scale, while two (1 and 7) were gauged on a percentage scale from 0 to 100. The remaining attribute (6) was measured in thousands of euros. We chose these seven attributes based upon our review of the literature and our discussions with experts knowledgeable about Spanish healthcare institutions. Inclusion of the first attribute, in particular, was

January 8, 2013

TRACKED CHANGES VERSION

8

Specialty choice in times of economic crisis

2012-002051

motivated by our hypothesis that the ongoing economic crisis and widely publicized budgetary cuts in the health sector had influenced students' perceptions about the likelihood of employment.

~~The translated text of each question, along the corresponding sample means and standard deviations of students' responses for FCM and for all remaining specialties combined, are given in Table 2. For all seven attributes, the differences in the mean ratings between FCM and other specialties combined were statistically significant ( $P < 0.001$ ).~~

### Statistical methods

We employed the mixed multinomial logit model<sup>4435</sup> to assess the influence of each of the seven attributes on students' choice of preferred specialty. The mixed multinomial logit model differs from the standard multinomial logit model in that the coefficients of each predictor variable may vary randomly in the population. In the context of discrete choice modeling, the mixed multinomial logit model captures the potential heterogeneity of individual preferences. For example, in the case of attribute 2, the mixed model admits the possibility that some students prefer a specialty with reduced work hours and a comfortable life style, while others prefer a specialty with long work hours and little leisure time.

In our application of the mixed multinomial logit model, the observations corresponded to the six specialties within the menus evaluated by each of the student respondents. For each student, the dependent variable was a binary indicator equal to 1 for the preferred specialty and 0 for the remaining five specialties in the student's menu.

January 8, 2013

TRACKED CHANGES VERSION

9

Specialty choice in times of economic crisis

2012-002051

The independent variables were each student's valuations of the seven attributes. In addition, we included interaction terms between each of the seven attributes and each personal characteristic in order to test whether the coefficients of the attributes differed by sex, age, university, expected graduation date, or the presence of physicians in the family. We also tested interactions between each attribute and a binary variable indicating concordance between the student's preferred and favorite specialty.

Adhering to the mixed logit specification, we further assumed that the coefficients of each attribute were normally distributed in the population with unknown mean and standard deviation. To assess whether there was significant heterogeneity in the coefficients of each attribute, apart from those differences attributable to the foregoing observed personal characteristics, we tested the null hypothesis that the estimated standard deviation of each coefficient's population distribution was equal to zero. We employed the chi-squared test based on the log likelihood ratio to assess the overall model goodness of fit.

To estimate our mixed multinomial logit model, we relied on the *mixlogit* routine in Stata 11 statistical software.<sup>4536</sup> Each raw coefficient outputted by this routine corresponds to the effect of a unit change in each attribute on the logarithm of the odds of preferring a specialty. Each raw coefficient can also be interpreted as the contribution of a unit change in each attribute to the "utility" of the specialty. In the tabulated results below, we report the exponentiated values of the raw coefficients, that is, the effect of a unit change on the odds of specialty preference. However, we used the raw coefficients to assess the quantitative tradeoffs between attributes. For example, to estimate the percentage increase in the proportion of the physician's compensation from private

January 8, 2013

TRACKED CHANGES VERSION

10

Specialty choice in times of economic crisis

2012-002051

practice (attribute 7) that would yield the same utility as a 1-percent increase in the probability of obtaining employment (attribute 1), we computed the ratio of the raw coefficient of attribute 1 to the raw coefficient of attribute 7.

Finally, to assess the external validity of our mixed multinomial logit model, we compared its predictions of specialty choice with the global ranking of specialties observed among the same nationwide cohort of medical graduates in the 2012 MIR selection process. We chose the 2012 MIR cycle for comparison because the students responding to our April 2011 survey subsequently graduated from medical school in June 2011, then studied for and took the MIR exam in January 2012, and then made their specialty selections during March of that year. Specifically, for each specialty within each student's menu, we computed the predicted probability that the student would prefer that specialty. For each specialty, we then compared its median predicted probability, as derived from our model, with its median ranking among all candidates who elected a specialty in the 2012 MIR cycle.

## Results

### Survey Response

Out of a total population of 3,874 registered sixth-year medical students nationwide, we received 978 responses (or 25%). These responses included students from each of Spain's 27 medical schools. While the response rate varied among medical schools, there were no significant differences in the gender or age composition of the respondents and the entire nationwide population (survey respondents: 71% female, mean age 24.1 years; nationwide population of sixth-year students: 71% female, mean age 24.7 years).

January 8, 2013

TRACKED CHANGES VERSION

11

Specialty choice in times of economic crisis

2012-002051

### **Descriptive Statistics**

Among the 978 medical students responding to the survey, 892 (91.2%) designated a preferred specialty, of whom 836 (93.7%) also designated a favorite specialty. For each of the seven questions, Table 1 shows the corresponding sample means and standard deviations of students' responses for FCM and for all remaining specialties combined. For all seven attributes, the differences in the mean ratings between FCM and other specialties combined were statistically significant ( $P < 0.001$ ).

### **Predictors of Specialty Preference**

Table 2 gives the principal results of our regression analyses. Model 1 represents the standard multinomial logit regression, in which all attribute coefficients are fixed, while Models 2 through 4 represent mixed multinomial logit regressions. In Model 2, in particular, the coefficient of attribute 2 (lifestyle and work hours) is permitted to vary within the population. In Model 3, interaction terms with attribute 6 (annual remuneration with 10–15 years' experience) are included as explanatory variables. In Model 4, attribute 6 and its interactions are removed altogether. We omit the results of other models where we found insignificant interactions between each attribute and sex, age, university, expected graduation date, the presence of physicians in the family, as well as a binary variable indicating concordance between the student's preferred and favorite specialty.

In all model specifications in Table 2, attribute 1 (the probability of obtaining employment) significantly influenced specialty preference. In Model 4, for example, each 10-percent increment in the probability of obtaining employment increased the odds of preferring a specialty by 33.7 percent (95% confidence interval (CI), 27.2% – 40.5%).

January 8, 2013

TRACKED CHANGES VERSION

12



Specialty choice in times of economic crisis

2012-002051

The magnitude of the effect was comparable to that of attribute 5 (professional development, including the possibility of promotion). Attributes 3 (recognition by patients) and 4 (prestige among colleagues) had smaller but significantly positive influences on specialty choice. For both attributes, a 1-point increment on a 10-point scale increased the odds of preferring a specialty by approximately 10–11 percent. The findings of Model 4 were not significantly altered when we included an interaction term for students at the University of Las Palmas de Gran Canaria, who took the electronic survey as a classroom-based pilot. (Results not shown.)

#### *Heterogeneity of Preferences for Life Style and Work Hours*

Although attribute 2 (life style and work hours) appeared to have a significant negative influence on specialty choice, our mixed multinomial logit Models 2, 3 and 4 revealed considerable population heterogeneity in this effect. In Model 4, for example, the population average effect was 0.907, with a 1-standard deviation range from 0.606 to 1.208 (that is,  $0.907 \pm 0.301$ ). Equivalently, a 1-point increment on a 10-point scale reduced the odds of preferring a specialty *on average* by an estimated 9.3 percent. However, for 68 percent of the students (which corresponds to the 1-standard deviation range for a normal distribution), the effect of a 1-point increment ranged from a 39.4 percent decrease to a 20.8 percent increase in the odds of preferring a specialty. Attribute 2 was the only explanatory variable to show significant population heterogeneity in our mixed multinomial logit regressions.

Figure 2 offers a visual representation of the population heterogeneity in the influence of lifestyle and work hours. ~~To construct the figure, we used the results of~~

January 8, 2013

TRACKED CHANGES VERSION

13

Specialty choice in times of economic crisis

2012-002051

~~Model 4 to compute the predicted effect for each individual student of a 1-point increment in attribute 2.~~ Each open point in the figure represents one student. The points are arranged in rows corresponding to the student's preferred specialty. ~~The horizontal axis gauges the predicted effect of a 1-point increment a 10-point scale of favorable lifestyle and work hours. The solid blue squares represent the population mean effect for each preferred specialty.~~ Among the 887 students included in Model 4, a total of 231 (or 26 percent) had a positive predicted effect of lifestyle and work hours on specialty preference.

Figure 2 displays considerable heterogeneity between preferred specialties. For example, among the group of 53 students preferring Dermatology, whose predicted effects are arrayed in the second row in Figure 2, the average effect of a 1-point increment a 10-point scale of favorable lifestyle and work hours was a 7.6-percent increase in the odds of preferring that specialty (corresponding to the solid blue square in the second row). Within this group, the predicted effect ranged from a 12.5-percent decrease to a 29.9-percent increase. For the 35 students preferring Family and Community Medicine, arrayed on the third row, the average effect of a 1-point increment along the scale of lifestyle and work hours was a 4.1-percent increase in the odds of specialty preference (corresponding to the solid blue square in the third row), with a predicted effect ranging from a 26.4-percent decrease to a 33.6-percent increase. By contrast, among the group of 73 students preferring Obstetrics & Gynecology, whose predicted effects are arrayed in the next-to-last row of the figure, the average effect of a 1-point increment was an 18.5 percent decrease in the odds of preferring that specialty

January 8, 2013

TRACKED CHANGES VERSION

14

Specialty choice in times of economic crisis

2012-002051

(the next-to-last solid blue square). Within this group, the predicted effect ranged from a 34.6-percent decrease to a 13.7-percent increase.

#### *Concordance between Preferred and Favorite Specialties*

Among the 892 students who reported both a preferred and a favorite specialty, we observed a concordance between the two responses in 676 students (or 75.8%). Figure 3 shows the rate of concordance, classified by preferred specialty. The rate of concordance ranged from a low of 53.8 percent among students who preferred Cardiovascular Surgery to 90.9 percent among those who preferred Intensive Care Medicine. The rate of concordance for Family and Community Medicine was 85.7 percent.

#### *Opportunities for Private Sector Remuneration*

In Models 1 and 2 in Table 2, attribute 6 (annual remuneration with 10–15 years experience) had a significant negative influence on specialty preference, while attribute 7 (proportion of compensation from private practice) had a significant positive effect. To address the apparent inconsistency between the estimated effects of the two different attributes, we included interaction terms with attribute 6 in our specification of Model 3. We found that the negative relation between annual remuneration and specialty preference remained statistically significant for female students and for those who reported a concordance of preferred and favorite specialty. There was no relationship between the effect of annual remuneration and a student's age.

Finally, in Model 4, when we dropped attribute 6 altogether, the effect of attribute 7 remained significant and positive, but its magnitude was decreased. With annual

January 8, 2013

TRACKED CHANGES VERSION

15

Specialty choice in times of economic crisis

2012-002051

remuneration included as an explanatory variable, each 10-percent increment in the proportion of compensation from private practice increased the odds of preferring a specialty by approximately 20–22 percent. With annual remuneration excluded, the effect of 10-percent increment in the proportion of compensation from private practice compensation increased the odds of specialty preference by only 7 percent.

### *Tradeoff between Job ~~Security~~-Availability and Opportunities for Private Sector Remuneration*

We focused specifically on the quantitative tradeoff between job ~~security~~-availability (attribute 1) and opportunities for private sector remuneration (attribute 7). Relying on the results of Model 4, we found that the raw coefficients of attributes 1 and 7 were, respectively, 0.290 (95% CI, 0.241–0.340) and 0.069 (95% CI, 0.028–0.110). The percentage increase in the proportion of the physician's compensation from private practice (attribute 7) that would yield the same utility as a 1-percent increase in the probability of obtaining employment (attribute 1) was therefore  $0.290 \cdot 0.069 = 4.2$ . Based on a linear approximation of the variance of the ratio of two random variables, we computed the 95% confidence interval around this estimate as 1.7–6.8.

### **External Validity: Comparison with MIR 2012 Global Rankings**

For all four models, the chi-squared statistic based on the log likelihood ratio showed a significant goodness of fit ( $P < 0.002$ ). As a further check of internal validity, we found a close match between the observed and predicted probabilities of specialty choice when broken down by decile of predicted probability.<sup>4637</sup>

January 8, 2013

TRACKED CHANGES VERSION

16

Specialty choice in times of economic crisis

2012-002051

Figure 4 displays a check of external validity. For each specialty, the figure plots median predicted probability of specialty preference against the median specialty ranking in the 2012 MIR cycle. The latter variable is plotted on a reverse scale since the most preferred specialties in the MIR selection process will have the lowest ranking numbers. Also plotted is the ordinary least squares regression line relating the two variables. The Spearman rank correlation between the two variables was  $-0.88$  and highly significant ( $P < 0.0001$ ).

The strong correlation between the model predictions and the MIR rankings can be seen through a comparison of Cardiology at the upper right, Anesthesiology near the center, and Family and Community Medicine (FCM) near the bottom left. Thus, among the 6,704 candidates nationwide who elected a specialty during the 2012 MIR selection process, the median ranking of those candidates choosing Cardiology was 555. (Only two specialties had a higher median ranking: Plastic Surgery at 136, and Dermatology at 404.) From a menu of six specialties offered to students participating in our survey, the median predicted probability of preferring Cardiology was 29.6 percent. For Anesthesiology, by contrast, the median ranking in the 2012 MIR cycle was 2,652, while the median predicted probability among survey respondents was 16.3 percent. For Family and Community Medicine, the median ranking in the 2012 MIR cycle was 5,552, while the median predicted probability among survey respondents was 9.2 percent.

## Discussion

In a cross-sectional survey of medical students in their final year before graduation, conducted in the midst of Spain's economic crisis, we found that job ~~security~~-availability

January 8, 2013

TRACKED CHANGES VERSION

17

Specialty choice in times of economic crisis

2012-002051

1  
2  
3  
4  
5  
6  
7  
8 had significant impact on the specialty preference. Based upon our Model 4 specification,  
9  
10 we found that each 10-percent increment in the probability of obtaining employment  
11  
12 increased the odds of preferring a specialty by 33.7 percent (95% CI, 27.2% – 40.5%).  
13  
14 Moreover, we observed considerable variability in the effect of lifestyle and work hours  
15  
16 on students' specialty preferences. Among students who would elect Dermatology if  
17  
18 there were no restrictions on specialty choice, the average effect of a 1-point increment a  
19  
20 10-point scale of favorable lifestyle and work hours was a 7.6-percent increase in the  
21  
22 odds of preferring that specialty. By contrast, among students preferring Obstetrics &  
23  
24 Gynecology, the average effect of a 1-point increment was an 18.5 percent decrease in  
25  
26 the odds of preferring that specialty.

27  
28 We also asked students to designate their favorite specialty, that is, the specialty  
29  
30 that they enjoyed the most, independent of future remuneration or working conditions.  
31  
32 The concordance between students' preferred and favorite specialties varied  
33  
34 considerably. Approximately 54 percent of students who preferred Cardiovascular  
35  
36 Surgery also designated it as their favorite specialty. By contrast, approximately 86  
37  
38 percent of students who preferred Family and Community Medicine also designated it as  
39  
40 their favorite specialty, while 91 percent of students who preferred Intensive Care  
41  
42 Medicine also designated it as their favorite specialty.

43  
44 Our survey included two attributes that reflected different aspects of physician  
45  
46 compensation: the average remuneration of a physician with 10–15 years experience, and  
47  
48 the proportion of compensation from private practice. We found that the former had an  
49  
50 unexpectedly negative relation to specialty preference, particularly among female  
51  
52 students and those whose favorite specialty matched their preferred specialty, while the latter

53  
54  
55 January 8, 2013

TRACKED CHANGES VERSION

18

Specialty choice in times of economic crisis

2012-002051

had a significant positive relation to specialty preference (Model 3). Eliminating the former from our regression analysis (Model 4), we estimated the tradeoff between job security and opportunities for private practice. An increase of approximately 4 percent in the proportion of the physician's compensation from private practice would yield the same utility as a 1-percent increase in the probability of obtaining employment.

Finally, as an external validity check, we found a high correlation between the specialty ranking predicted by our mixed multinomial logit model with the nationwide specialty ranking in the 2012 MIR selection process. In particular, the median probability that a student would select Family & Community Medicine out of a menu of six specialty choices was approximately 9 percent, while the median MIR ranking of this specialty was 5,552 out of 6,704 candidates.

### Study Limitations

Our study has a number of important limitations. To begin with, our survey sample of 978 respondents constituted only 25% of the entire nationwide population of 3,874 registered students in their final year of medical school. While our sample covered all 27 of Spain's medical schools, and while we found no significant difference in gender or age composition between our sample and the entire nationwide population, the apparently low response rate raises the possibility that our conclusions cannot be generalized or are subject to non-response bias.

Open-ended online surveys generally yield much lower response rates than a direct personal invitation via postal mail accompanied by a paper questionnaire.<sup>47</sup> In particular, surveys of specialty choice among students in a single medical school or

**Formatted:** Do not check spelling or grammar, Superscript

January 8, 2013

TRACKED CHANGES VERSION

19

Specialty choice in times of economic crisis

2012-002051

clinical rotation have yielded high response rates ranging from 65 to 97 percent.<sup>4 5 7 9 13 28-</sup>

**Formatted:** Do not check spelling or grammar, Superscript

<sup>30 34 37</sup> By contrast, an Internet-based survey soliciting participation of students in 70 U.S.

medical schools received online responses from students in only 16 schools.<sup>16</sup> An online

**Formatted:** Do not check spelling or grammar, Superscript

survey covering students in all five medical schools in the federal state of Baden-

Wuerttemberg in Germany yielded only 11% of eligible students.<sup>33</sup> A recent online

**Formatted:** Do not check spelling or grammar, Superscript

survey of students taking the 2011 National Grading Examination in France yielded a

24% response rate.<sup>36</sup>

**Formatted:** Do not check spelling or grammar, Superscript

Despite the low response rate, our Internet-based survey achieved wide coverage

**Formatted:** Indent: First line: 0.5"

at low cost. It is at least arguable that the conclusions from our sample of 978 students

from all 27 of Spain's medical schools are more generalizable than a hypothetical study

of a 100-percent sample of 978 students from a single medical school. Nor do we have

any evidence of significant non-response bias. Students at the University of Las Palmas

de Gran Canaria, who took the survey as a classroom pilot and had a higher response rate,

nonetheless placed the same valuation on job availability as those who took the survey

online.

An additional limitation of our study is the lack of prior survey results for

comparison. ~~To begin with, w~~We surveyed students only once in April 2011. We have no

data from a comparable cross-sectional survey carried out before the onset of Spain's

economic crisis in late ~~2007~~2008. Our results are at least consistent with the finding from

a 2009 survey in Ireland – carried out in the midst of the country's financial crisis – that

medical students and junior doctors attached high importance to "future employment" in

specialty choice.<sup>29</sup> A 2010 survey of all first- through sixth-year medical students from a

**Formatted:** Do not check spelling or grammar, Superscript

single Spanish medical school found that "quality of life" and "professional prestige"

January 8, 2013

TRACKED CHANGES VERSION

20



Specialty choice in times of economic crisis

2012-002051

were important factors in specialty choice, but aspects of job security were not considered.<sup>37</sup> Further confirmation of the lasting importance of job security in specialty choice will require repeat surveys once employment prospects for physicians have improved.

**Formatted:** Do not check spelling or grammar, Superscript

Nor do we report longitudinal follow-up data on the evolution of our respondents' specialty preferences over time. There is evidence from longitudinal studies that students' specialty preferences evolve during medical school.<sup>48 4938-39</sup> In a study of internal medicine residents in the United States, 62 percent changed the subspecialty career choice at least once during residency.<sup>5040</sup> In a longitudinal follow-up of U.K. medical graduates 10 years after graduation, approximately one-quarter were working in a specialty different from that chosen 3 years after graduation.<sup>2627</sup> It is notable, however, that 91.2% of students that we surveyed reported a preferred specialty, whereas in the United Kingdom, 28% of medical school graduates in the 1990s knew their preferred specialty one year after graduation.<sup>2627</sup> The high correlation between specialty choice predicted by our model and specialty choices observed in the MIR 2012 cycle (Figure 3) does not suggest a marked shift in preferences during the one-year period after medical school graduation, during which prospective candidates study for the national exam and then participate in the sequential selection process.

The explanatory variables in our model (Table 1) were derived from students' perceptions and expectations, rather than objective data. It is entirely possible, for example, that students exaggerated the importance of job security (attribute 1). By April 2012, with Spain's overall unemployment rate hovering around 25%, the psychologically menacing figure of 2,000 unemployed doctors<sup>5144</sup> still represented only 1 percent of the

January 8, 2013

TRACKED CHANGES VERSION

21

Specialty choice in times of economic crisis

2012-002051

active physician workforce. While a few studies have correlated specialty preferences with objective data on remuneration, work hours, malpractice risk, and debt upon graduation,<sup>8 128-12</sup> we stress that students' subjective perceptions and expectations are the principal determinants of specialty choice.

While a number of studies have focused on the "controllable lifestyle" as an important determinant of specialty choice,<sup>1 2 4-16 19 21-24 521-2 4-16-19 21-25</sup> our results shed new light on the heterogeneity of preferences for lifestyle and work hours. We find, in fact, that only 26 percent of respondents placed a positive value on reduced work hours, while 74 percent placed a positive value on working more (as shown by the distribution of points in Figure 2). One possible explanation is that, in a healthcare system where public-sector salaries are fixed by collective bargaining, taking on additional on-call assignments after regular working hours is viewed primarily as a means of increasing remuneration. In the EuroStat Labor Force Surveys, Spanish physicians reported working an average of 39 hours per week,<sup>53-42</sup> even though the collectively agreed-upon formal work week was 35 hours.

Our failure to find a significant positive effect of annual remuneration (attribute 6) may reflect students' inadequate knowledge of physicians' salaries, a phenomenon that has also been observed in the U.S.<sup>54-43</sup> It is possible that students' estimates of remuneration were overly influenced by short-term concerns about job security, even though the underlying question was framed over a 10–15 year horizon. Nationally representative data on the earnings of Spanish physicians have not been published. Students' estimates of the annual remuneration of a non-FCM specialist were on average

January 8, 2013

TRACKED CHANGES VERSION

22

Specialty choice in times of economic crisis

2012-002051

44% greater than that of a practitioner of FCM (Table 1), a value that falls within the range of specialist-GP remuneration ratios of other OECD countries.<sup>5544</sup>

In Canada, physicians' fee-for-service payments correlate strongly with income,<sup>1747</sup> whereas in the United Kingdom, opportunities for non-NHS consultant work constitute an important determinant of variations in income.<sup>5645</sup> Our finding that attribute 7 was a significant predictor of specialty choice indicates that, in Spain's healthcare system where publicly financed salaries are the dominant form of physician compensation, opportunities for additional private-sector employment are a more sensitive proxy for physician income. For this reason, we based our calculations of the tradeoff between job security and remuneration on the results of Model 4, which excludes attribute 6 entirely.

A few studies have employed a discrete choice experiment – rather than a cross-sectional survey – to assess the determinants of physicians' choice of specialty,<sup>3525</sup> working conditions,<sup>56 5745-46</sup> and urban versus rural practice.<sup>5847</sup> A discrete choice experiment has the advantage that each potential determinant of physician choice can be independently controlled and varied randomly. In principle, such a study design might have helped us distinguish more precisely between total remuneration (attribute 6) and opportunities for private sector employment (attribute 7). It might also have allowed us to assess more precisely the extent to which the “workaholics” in our study, who preferred specialties with more working hours (attribute 2), would trade off higher income for reduced leisure time. One drawback of the discrete choice experimental design is that respondents choose between hypothetical choices constructed by the experimenter, whereas in our cross-sectional study, we directly observe the perceived attributes of the

January 8, 2013

TRACKED CHANGES VERSION

23

Specialty choice in times of economic crisis

2012-002051

actual specialty options available to graduating medical students. While the results of discrete choice experiments can be used in simulations, our cross-sectional design thus facilitates external validation of our results (Figure 4).

We asked students to report both their preferred and favorite specialties, a distinction we have not encountered in any other study. While Spanish medical students generally report a high level of concordance between the two (76%), we observed considerable variation by preferred specialty (Figure 2). It is noteworthy that five of the highest ranked specialties in the 2011 MIR cycle (Cardiovascular Surgery, Neurosurgery, Plastic Surgery, Cardiology and Dermatology; see Figure 4) had low levels of concordance. By contrast, the observed high levels of concordance for Internal Medicine and Family and Community Medicine suggest that students who prefer these specialties do so despite the low salaries, minimal opportunities for private-sector remuneration, or unfavorable working conditions. This conclusion is further supported by the observed negative effect of the interaction between concordance and remuneration in Model 3 (Table 2).

### Policy Implications

Increased remuneration, more favorable working conditions and enhanced prestige have routinely been proposed as incentives to lure medical students into primary care and family practice. In Spain, however, physician remuneration within the public sector is determined by decentralized collective bargaining between unions and local governments. Opportunities for ~~practitioners of Family and Community Medicine~~ ~~primary care and family practice physicians~~ to earn additional income in the private sector are

January 8, 2013

TRACKED CHANGES VERSION

24

Specialty choice in times of economic crisis

2012-002051

scarce and even less under the control of the central government. Improvements in working conditions and enhancement of prestige are longer-term solutions that will require reformulation of the nature of work of the primary care physician and the role of community health centers.<sup>38 3929-30</sup>

Our findings, by contrast, suggest other shorter-term policy levers that may take advantage of the high level of perceived job ~~security-availability~~ of FCM (Table 1) and thus increase the flow of medical school graduates into the field. To the extent that the healthcare budgets of the country's 17 autonomous communities must continue to endure budgetary cuts, our results argue for sparing community health centers and the practitioners of FCM who work in them. As part of its crisis management, the Spanish central government has recently increased physicians' legal work week from 35 to 37.5 hours, a measure that has sparked more than a few protests.<sup>59 6048-49</sup> Ironically, this measure will cut mostly into the incomes of non-FCM specialists who earned additional income through after-hours ~~guardias-private consultations~~ and thus reduce the income disparity with ~~family-FCM~~ physicians.

As a separate policy instrument, the central government's Ministry of Health could cautiously expand the number of approved post-graduate training positions in FCM, which has recently become a limiting factor in the resurgence of this specialty since 2008 (Figure 1). There is evidence that many residents already in training in FCM have chosen to retake the national MIR exam and reenter the selection process as ~~candidatos~~ despite the requirement that they abandon their current training position.<sup>3829</sup> It is conceivable that too large an excess of unfilled training slots in FCM could aggravate this perverse incentive.

January 8, 2013

TRACKED CHANGES VERSION

25

Specialty choice in times of economic crisis

2012-002051

## Conclusions

In the midst of an ongoing economic crisis, ~~job security~~ the likelihood of obtaining employment has assumed critical importance as a determinant of specialty preference among Spanish medical students. Public policies that take advantage of the enhanced perceived job ~~security-availability~~ of FCM may be an effective way to steer medical school graduates into this specialty.

January 8, 2013

TRACKED CHANGES VERSION

26

Specialty choice in times of economic crisis

2012-002051

## Footnotes

### Contributors

All authors (JEH, BGL, VOR, PBP) contributed substantially to the conceptualization and design of the survey. JEH, BGL and PBP performed statistical analyses on the survey data. JEH and BGL wrote the initial drafts, while VOR and PBP made substantive changes to various drafts. All contributors approved the final version for publication.

### Acknowledgements

We gratefully acknowledge the research assistance of Teresa Suárez de Sousa.

### Competing Interests

All authors have completed the United Competing Interest form at [www.icmje.org/coi\\_disclosure.pdf](http://www.icmje.org/coi_disclosure.pdf) (available on request from the corresponding author) and declare that they have no competing interests.

### Funding

The Spanish Ministry of Science and Innovation, through Grant ECO2010-21558 to BGL as principal investigator, supported the development, execution and analysis of the survey described in this study.

### Copyright License

The Corresponding Author has the right to grant on behalf of all authors and does grant on behalf of all authors, an exclusive licence (or non exclusive for government

January 8, 2013

TRACKED CHANGES VERSION

27

Specialty choice in times of economic crisis

2012-002051

employees) on a worldwide basis to the BMJ Publishing Group Ltd to permit this article (if accepted) to be published in BMJ editions and any other BMJ PGL products and sublicences such use and exploit all subsidiary rights, as set out in our licence.

#### Statement concerning Ethical Approval

No ethical approval was required for this research.

#### Data Sharing Statement

The detailed results of all statistical analyses, including statistical code, are available from the corresponding author at [jeffrey@mit.edu](mailto:jeffrey@mit.edu).

January 8, 2013

TRACKED CHANGES VERSION

28



## Article Summary

### Article focus.

- Ours is the first [comprehensive](#) study of the determinants of physician specialty choice in Spain, a country whose healthcare system is dominated by the public sector.
- Since 2008, when Spain entered into a severe, ongoing economic crisis, the percentage of Spanish medical school graduates electing Family and Community Medicine (FCM) has experienced a reversal after more than a decade of decline.
- In an April 2011 nationwide cross-sectional survey of graduating students from all Spanish medical schools, we focus on [job security](#) [the likelihood of obtaining employment](#) as a determinant of physician specialty choice.

### Key messages.

- We find that job [security-availability](#) has assumed a key role in determining specialty choice.
- We confirm the importance of such factors as prestige, opportunity for professional development, and private sector remuneration.
- In contrast to prior studies, we find wide variation in the importance that Spanish medical students attach to a controllable life style and reduced work hours.

### Strengths and limitations of this study.

- Our findings suggest policy levers that may take advantage of the high level of perceived job security of Family and Community Medicine and thus increase the flow of medical school graduates into the field.

1  
2  
3  
4  
5  
6  
7  
8  
9  
10  
11  
12  
13  
14  
15  
16  
17  
18  
19  
20  
21  
22  
23  
24  
25  
26  
27  
28  
29  
30  
31  
32  
33  
34  
35  
36  
37  
38  
39  
40  
41  
42  
43  
44  
45  
46  
47  
48  
49  
50  
51  
52  
53  
54  
55  
56  
57  
58  
59  
60

Specialty choice in times of economic crisis

2012-002051

- In the present study, we use online survey methods to achieve wide coverage of all 27 of Spain’s medical schools at the expense of a reduced response rate. Moreover, we do not report longitudinal follow-up data on our respondents’ specialty preferences over time.

For peer review only

January 8, 2013

TRACKED CHANGES VERSION

30

Specialty choice in times of economic crisis

2012-002051

Table 1. Seven survey questions on attributes of medical specialties<sup>a</sup>

|   | Attribute and Survey Text                                                                                                                                                                                                                               | FCM            | All Others     |
|---|---------------------------------------------------------------------------------------------------------------------------------------------------------------------------------------------------------------------------------------------------------|----------------|----------------|
|   |                                                                                                                                                                                                                                                         | Mean<br>S.D.   | Mean<br>S.D.   |
| 1 | <i>Probability of Obtaining Employment.</i> “How would you rate the probability of obtaining work in the next three years, whether in the public or private sector, for an individual who became certified in this specialty today? (0 to 100 percent)” | 83.98<br>19.89 | 64.78<br>23.92 |
| 2 | <i>Lifestyle &amp; Work Hours.</i> “Work hours, working conditions, and the ability to reconcile work with family life. (0 to 10, 0 = very bad, 10 = very good)”                                                                                        | 7.78<br>2.09   | 6.78<br>2.25   |
| 3 | <i>Recognition by Patients.</i> “Recognition of professional work on the part of patients. (0 to 10)”                                                                                                                                                   | 5.92<br>2.60   | 6.34<br>2.73   |
| 4 | <i>Prestige among Colleagues.</i> “Prestige and recognition among colleagues as well as social recognition. (0 to 10)”                                                                                                                                  | 3.92<br>2.28   | 6.30<br>2.52   |
| 5 | <i>Opportunity for Professional Development.</i> “Possibility of promotion or future professional development within the specialty (new fields, new techniques, scientific advances). (0 to 10)”                                                        | 5.11<br>2.30   | 7.20<br>2.15   |
| 6 | <i>Annual Remuneration with 10–15 Years Experience.</i> “Estimate the current average annual gross remuneration (public and private combined) of a specialist with 10–15 years of experience. (Thousands of euros)” <sup>b</sup>                        | 60.00<br>0.16  | 86.56<br>31.96 |
| 7 | <i>Proportion of Compensation from Private Practice.</i> “What percentage of this remuneration (including public and private) do you believe comes from private practice? (0 to 100 percent)” <sup>b</sup>                                              | 0.00<br>0.00   | 39.32<br>23.40 |

a. The introductory text was, “In this section, you’ll define your profile of some medical specialties, including the one that you’ve just chosen as your first choice as well as others chosen at random. Think about your *perceptions and expectations* concerning each specialty.”

b. The preamble to the two questions on attributes 6 and 7 was: “The following questions are about compensation. To facilitate your responses, recall that the average annual gross income of a full-time specialist in Family & Community Medicine with 10–15 years experience is currently about 60,000 euros.”

January 8, 2013

TRACKED CHANGES VERSION

31

Specialty choice in times of economic crisis

2012-002051

Table 2. Mixed Multinomial Logit Regression Results<sup>a</sup>

| Explanatory Variable                                             | Model 1                  | Model 2                  | Model 3                  | Model 4                  |
|------------------------------------------------------------------|--------------------------|--------------------------|--------------------------|--------------------------|
| 1. Probability of Obtaining Employment <sup>b</sup>              | 1.324<br>[1.263 , 1.388] | 1.346<br>[1.278 , 1.418] | 1.339<br>[1.271 , 1.412] | 1.337<br>[1.272 , 1.405] |
| 2. Lifestyle & Work Hours                                        | 0.905<br>[0.867 , 0.944] | 0.901<br>[0.852 , 0.952] | 0.891<br>[0.843 , 0.943] | 0.907<br>[0.860 , 0.957] |
| Population Standard Deviation                                    |                          | 0.288<br>[0.161 , 0.415] | 0.282<br>[0.155 , 0.409] | 0.301<br>[0.182 , 0.419] |
| 3. Recognition by Patients                                       | 1.105<br>[1.055 , 1.157] | 1.118<br>[1.064 , 1.176] | 1.116<br>[1.061 , 1.173] | 1.098<br>[1.047 , 1.151] |
| 4. Prestige among Colleagues                                     | 1.082<br>[1.024 , 1.143] | 1.096<br>[1.033 , 1.163] | 1.110<br>[1.046 , 1.179] | 1.062<br>[1.005 , 1.121] |
| 5. Opportunity for Professional Development                      | 1.326<br>[1.254 , 1.403] | 1.347<br>[1.267 , 1.432] | 1.347<br>[1.265 , 1.433] | 1.303<br>[1.229 , 1.381] |
| 6. Annual Remuneration with 10–15 Years Experience <sup>c</sup>  | 0.821<br>[0.782 , 0.863] | 0.812<br>[0.770 , 0.856] | 1.062<br>[0.701 , 1.610] |                          |
| Interaction: Female Gender                                       |                          |                          | 0.884<br>[0.817 , 0.957] |                          |
| Interaction: Concordance with Favorite Specialty <sup>d</sup>    |                          |                          | 0.885<br>[0.815 , 0.962] |                          |
| Interaction: Age (Years)                                         |                          |                          | 0.995<br>[0.978 , 1.012] |                          |
| 7. Proportion of Compensation from Private Practice <sup>b</sup> | 1.195<br>[1.139 , 1.255] | 1.210<br>[1.148 , 1.276] | 1.218<br>[1.154 , 1.285] | 1.071<br>[1.028 , 1.116] |
| Number of respondents <sup>e</sup>                               | 836                      | 836                      | 818                      | 887                      |
| Number of observations <sup>f</sup>                              | 4,839                    | 4,839                    | 4,738                    | 5,184                    |

a. The coefficients represent the effect of a unit change in the independent variable on the odds of preferring a specialty. Numbers in brackets below each coefficient are 95% confidence intervals.

b. Attribute values normalized to range from 0 to 10, so that each unit corresponds to 10 percent.

c. Attribute values normalized so that each unit corresponds to €10,000.

d. Binary variable equal to 1 when the student's preferred specialty is also his favorite specialty.

e. Number of students with data on all explanatory variables in the model.

f. Number of specialty choices with data on all explanatory variables in the model.

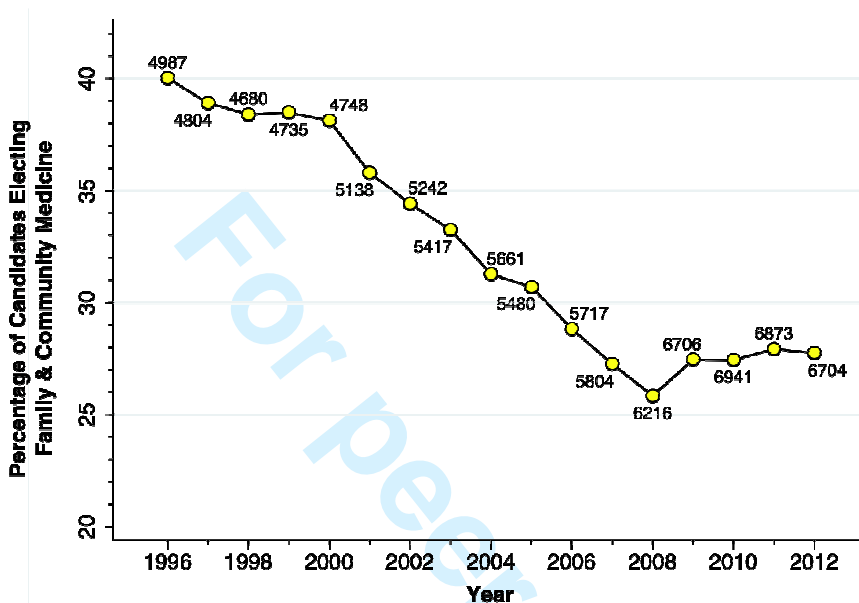

**Figure 1. Percentage of Candidates Participating in the Annual Internship-Residency (“MIR”) Selection Process Who Elected a Training Position in Family and Community Medicine, 1996–2012.** Adjacent to each point is the total number of candidates participating in the MIR selection process in the corresponding year. *Source:* Compiled from annual data provided by the Ministerio de Sanidad y Política Social, Subdirección General de Ordenación Profesional, Spain.

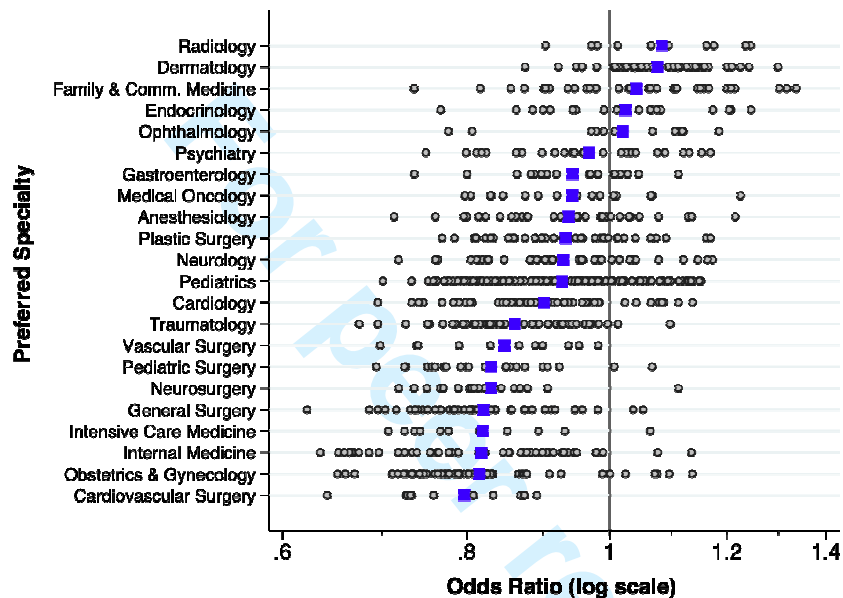

**Figure 2.** Effect of a 1-point increment in *Lifestyle & Work Hours* rating on odds ratio of preferring a specialty. We used the results of Model 4 to compute the predicted effect for each individual student of a 1-point increment in attribute 2 (Lifestyle & Work Hours). Each open point in the figure represents one student. The points are arranged in rows corresponding to the student's preferred specialty. The horizontal axis gauges the predicted effect of a 1-point increment a 10-point scale of favorable lifestyle and work hours. The solid blue squares represent the population mean effect for students in each preferred specialty. Each point corresponds to an individual student. The points are classified by the student's preferred specialty. The blue squares show the mean effect for each preferred specialty. Not shown are preferred specialties with fewer than 10 respondents.

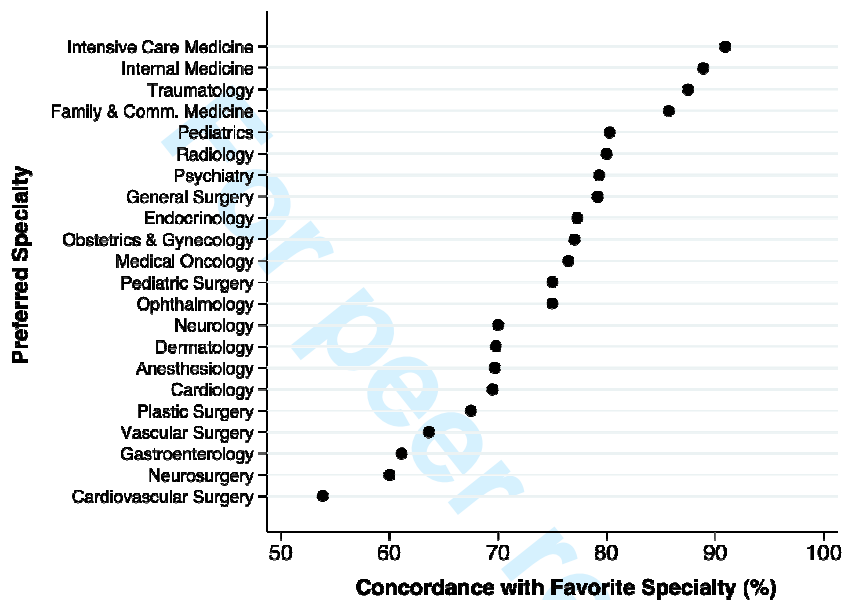

**Figure 3. Concordance of preferred with favorite specialty.** For each preferred specialty, the black points show the proportion of students who also designated that specialty as their favorite.

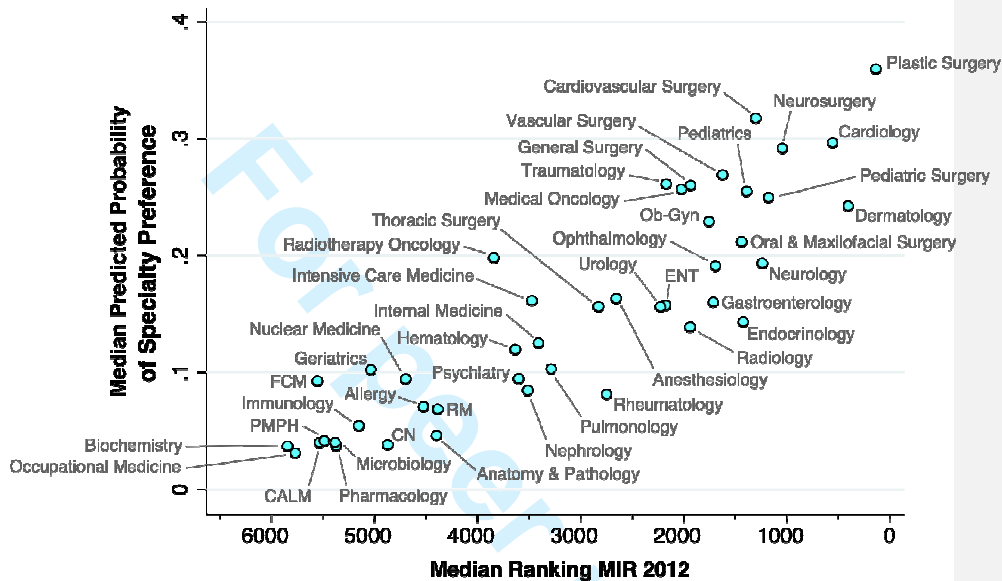

**Figure 4. Median predicted probability of specialty preference in relation to the median specialty ranking in the 2012 MIR selection process.** CALM = Clinical Analysis & Laboratory Medicine. CN = Clinical Neurophysiology. ENT = Otorhinolaryngology. FCM = Family and Community Medicine. Ob-Gyn = Obstetrics & Gynecology. PMPH = Preventive Medicine & Public Health. RM = Rehabilitation Medicine.



References

1. Schwartz RW, Haley JV, Williams C, Jarecky RK, Strodel WE, Young B, et al. The controllable lifestyle factor and students' attitudes about specialty selection. *Acad Med* 1990;65(3):207-10.

Formatted: Font: Times, 12 pt, Do not check spelling or grammar

Formatted: Font: Times, 12 pt, Italic, Do not check spelling or grammar

Formatted: Font: Times, 12 pt, Do not check spelling or grammar

2. Kassler WJ, Wartman SA, Silliman RA. Why medical students choose primary care careers. *Acad Med* 1991;66(1):41-3.

Formatted: Font: Times, 12 pt, Italic, Do not check spelling or grammar

3. Hurley JE. Physicians' Choices of Specialty, Location, and Mode: A Reexamination within an Interdependent Decision Framework. *Journal of Human Resources* 1991;26(1):47-71.

Formatted: Font: Times, 12 pt, Do not check spelling or grammar

Formatted: Font: Times, 12 pt, Italic, Do not check spelling or grammar

Formatted: Font: Times, 12 pt, Do not check spelling or grammar

4. Fincher RM, Lewis LA, Rogers LQ. Classification model that predicts medical students' choices of primary care or non-primary care specialties. *Acad Med* 1992;67(5):324-7.

Formatted: Font: Times, 12 pt, Italic, Do not check spelling or grammar

Formatted: Font: Times, 12 pt, Do not check spelling or grammar

5. Osborn EH. Factors influencing students' choices of primary care or other specialties. *Acad Med* 1993;68(7):572-4.

Formatted: Font: Times, 12 pt, Italic, Do not check spelling or grammar

6. Rosenthal MP, Diamond JJ, Rabinowitz HK, Bauer LC, Jones RL, Kearl GW, et al. Influence of income, hours worked, and loan repayment on medical students' decision to pursue a primary care career. *JAMA* 1994;271(12):914-7.

Formatted: Font: Times, 12 pt, Do not check spelling or grammar

Formatted: Font: Times, 12 pt, Italic, Do not check spelling or grammar

7. Burack JH, Irby DM, Carline JD, Ambrozy DM, Ellsbury KE, Stritter FT. A study of medical students' specialty-choice pathways: trying on possible selves. *Acad Med* 1997;72(6):534-41.

Formatted: Font: Times, 12 pt, Do not check spelling or grammar

Formatted: Font: Times, 12 pt, Italic, Do not check spelling or grammar

Formatted: Font: Times, 12 pt, Do not check spelling or grammar

8. Thornton J. Physician choice of medical specialty: do economic incentives matter? *Applied Economics* 2000;32(11):1419-28.

Formatted: Font: Times, 12 pt, Italic, Do not check spelling or grammar

Formatted: Font: Times, 12 pt, Do not check spelling or grammar

Specialty choice in times of economic crisis

2012-002051

9. Gelfand DV, Podnos YD, Wilson SE, Cooke J, Williams RA. Choosing general

surgery: insights into career choices of current medical students. *Arch Surg*

2002;137(8):941-5; discussion 45-7.

**Formatted:** Font: Times, 12 pt, Italic, Do not check spelling or grammar

**Formatted:** Font: Times, 12 pt, Do not check spelling or grammar

10. Nicholson S. Physician Specialty Choice under Uncertainty. *Journal of Labor*

*Economics* 2002;20(4):816-47.

**Formatted:** Font: Times, 12 pt, Italic, Do not check spelling or grammar

**Formatted:** Font: Times, 12 pt, Do not check spelling or grammar

11. Dorsey ER, Jarjoura D, Rutecki GW. Influence of controllable lifestyle on recent

trends in specialty choice by US medical students. *JAMA* 2003;290(9):1173-8.

**Formatted:** Font: Times, 12 pt, Italic, Do not check spelling or grammar

12. Thornton J, Esposto F. How important are economic factors in choice of medical

specialty? *Health Econ* 2003;12(1):67-73.

**Formatted:** Font: Times, 12 pt, Do not check spelling or grammar

**Formatted:** Font: Times, 12 pt, Italic, Do not check spelling or grammar

13. Azizzadeh A, McCollum CH, Miller CC, 3rd, Holliday KM, Shilstone HC, Lucci A,

Jr. Factors influencing career choice among medical students interested in surgery.

*Curr Surg* 2003;60(2):210-3.

**Formatted:** Font: Times, 12 pt, Italic, Do not check spelling or grammar

14. Wright B, Scott I, Woloschuk W, Brenneis F, Bradley J. Career choice of new

medical students at three Canadian universities: family medicine versus specialty

medicine. *CMAJ* 2004;170(13):1920-4.

**Formatted:** Font: Times, 12 pt, Do not check spelling or grammar

**Formatted:** Font: Times, 12 pt, Italic, Do not check spelling or grammar

15. Harris MG, Gavel PH, Young JR. Factors influencing the choice of specialty of

Australian medical graduates. *Med J Aust* 2005;183(6):295-300.

**Formatted:** Font: Times, 12 pt, Do not check spelling or grammar

**Formatted:** Font: Times, 12 pt, Italic, Do not check spelling or grammar

16. Cochran A, Melby S, Neumayer LA. An Internet-based survey of factors influencing

medical student selection of a general surgery career. *Am J Surg* 2005;189(6):742-6.

**Formatted:** Font: Times, 12 pt, Do not check spelling or grammar

**Formatted:** Font: Times, 12 pt, Italic, Do not check spelling or grammar

17. Gagne R, Leger PT. Determinants of physicians' decisions to specialize. *Health Econ*

2005;14(7):721-35.

**Formatted:** Font: Times, 12 pt, Do not check spelling or grammar

**Formatted:** Font: Times, 12 pt, Italic, Do not check spelling or grammar

18. Kutob RM, Senf JH, Campos-Outcalt D. The diverse functions of role models across

primary care specialties. *Fam Med* 2006;38(4):244-51.

**Formatted:** Font: Times, 12 pt, Do not check spelling or grammar

**Formatted:** Font: Times, 12 pt, Italic, Do not check spelling or grammar

**Formatted:** Font: Times, 12 pt, Do not check spelling or grammar

January 8, 2013

TRACKED CHANGES VERSION

38

Specialty choice in times of economic crisis

2012-002051

19. Sanfey HA, Saalwachter-Schulman AR, Nyhof-Young JM, Eidelson B, Mann BD.

Influences on medical student career choice: gender or generation? *Arch Surg*

2006;141(11):1086-94; discussion 94.

**Formatted:** Font: Times, 12 pt, Italic, Do not check spelling or grammar

**Formatted:** Font: Times, 12 pt, Do not check spelling or grammar

20. Lambert TW, Goldacre MJ, Turner G. Career choices of United Kingdom medical

graduates of 2002: questionnaire survey. *Med Educ* 2006;40(6):514-21.

**Formatted:** Font: Times, 12 pt, Italic, Do not check spelling or grammar

21. Horn L, Tzanetos K, Thorpe K, Straus SE. Factors associated with the subspecialty

choices of internal medicine residents in Canada. *BMC Med Educ* 2008;8:37.

**Formatted:** Font: Times, 12 pt, Do not check spelling or grammar

**Formatted:** Font: Times, 12 pt, Italic, Do not check spelling or grammar

22. Hauer KE, Durning SJ, Kernan WN, Fagan MJ, Mintz M, O'Sullivan PS, et al.

Factors associated with medical students' career choices regarding internal medicine.

*JAMA* 2008;300(10):1154-64.

**Formatted:** Font: Times, 12 pt, Do not check spelling or grammar

**Formatted:** Font: Times, 12 pt, Italic, Do not check spelling or grammar

23. Scott IM, Matejcek AN, Gowans MC, Wright BJ, Brenneis FR. Choosing a career in

surgery: factors that influence Canadian medical students' interest in pursuing a

surgical career. *Can J Surg* 2008;51(5):371-7.

**Formatted:** Font: Times, 12 pt, Do not check spelling or grammar

**Formatted:** Font: Times, 12 pt, Italic, Do not check spelling or grammar

24. West CP, Drefahl MM, Popkave C, Kolars JC. Internal medicine resident self-report

of factors associated with career decisions. *J Gen Intern Med* 2009;24(8):946-9.

**Formatted:** Font: Times, 12 pt, Do not check spelling or grammar

**Formatted:** Font: Times, 12 pt, Italic, Do not check spelling or grammar

25. Bennett KL, Phillips JP. Finding, recruiting, and sustaining the future primary care

physician workforce: a new theoretical model of specialty choice process. *Acad Med*

2010;85(10 Suppl):S81-8.

**Formatted:** Font: Times, 12 pt, Do not check spelling or grammar

**Formatted:** Font: Times, 12 pt, Italic, Do not check spelling or grammar

**Formatted:** Font: Times, 12 pt, Do not check spelling or grammar

26. Goldacre MJ, Laxton L, Lambert TW. Medical graduates' early career choices of

specialty and their eventual specialty destinations: UK prospective cohort studies.

*BMJ* 2010;341:c3199.

**Formatted:** Font: Times, 12 pt, Italic, Do not check spelling or grammar

**Formatted:** Font: Times, 12 pt, Do not check spelling or grammar

27. Lefevre JH, Roupret M, Kerneis S, Karila L. Career choices of medical students: a

national survey of 1780 students. *Med Educ* 2010;44(6):603-12.

**Formatted:** Font: Times, 12 pt, Do not check spelling or grammar

**Formatted:** Font: Times, 12 pt, Italic, Do not check spelling or grammar

**Formatted:** Font: Times, 12 pt, Do not check spelling or grammar

January 8, 2013

TRACKED CHANGES VERSION

39

28. Fukuda Y, Harada T. Gender differences in specialty preference and mismatch with real needs in Japanese medical students. *BMC Med Educ* 2010;10:15.

Formatted: Font: Times, 12 pt, Italic, Do not check spelling or grammar

29. Glynn RW, Kerin MJ. Factors influencing medical students and junior doctors in choosing a career in surgery. *Surgeon* 2010;8(4):187-91.

Formatted: Font: Times, 12 pt, Do not check spelling or grammar

30. Bindal T, Wall D, Goodyear HM. Medical students' views on selecting paediatrics as a career choice. *Eur J Pediatr* 2011;170(9):1193-9.

Formatted: Font: Times, 12 pt, Do not check spelling or grammar

31. Heikkila T, Hyppola H, Kumpusalo E, Halila H, Vanska J, Kujala S, et al. Choosing a medical specialty--study of Finnish doctors graduating in 1977-2006. *Med Teach* 2011;33(8):e440-5.

Formatted: Font: Times, 12 pt, Italic, Do not check spelling or grammar

Formatted: Font: Times, 12 pt, Do not check spelling or grammar

Formatted: Font: Times, 12 pt, Italic, Do not check spelling or grammar

Formatted: Font: Times, 12 pt, Do not check spelling or grammar

32. Scott I, Gowans M, Wright B, Brenneis F, Banner S, Boone J. Determinants of choosing a career in family medicine. *CMAJ* 2011;183(1):E1-8.

Formatted: Font: Times, 12 pt, Italic, Do not check spelling or grammar

33. Kiolbassa K, Miksch A, Hermann K, Loh A, Szecsenyi J, Joos S, et al. Becoming a general practitioner--which factors have most impact on career choice of medical students? *BMC Fam Pract* 2011;12:25.

Formatted: Font: Times, 12 pt, Do not check spelling or grammar

Formatted: Font: Times, 12 pt, Italic, Do not check spelling or grammar

34. Ravindra P, Fitzgerald JE. Defining surgical role models and their influence on career choice. *World J Surg* 2011;35(4):704-9.

Formatted: Font: Times, 12 pt, Do not check spelling or grammar

Formatted: Font: Times, 12 pt, Italic, Do not check spelling or grammar

35. Sivey P, Scott A, Witt J, Joyce C, Humphreys J. Junior doctors' preferences for specialty choice. *J Health Econ* 2012;31(6):813-23.

Formatted: Font: Times, 12 pt, Do not check spelling or grammar

Formatted: Font: Times, 12 pt, Italic, Do not check spelling or grammar

36. Gaucher S, Thabut D. [Medical specialty choice: What impact of teaching? Results of a survey of two medical schools.]. *Presse Med* 2012.

Formatted: Font: Times, 12 pt, Do not check spelling or grammar

Formatted: Font: Times, 12 pt, Italic, Do not check spelling or grammar

37. Mena G, Lluvia A, Sequera VG, Aldea M. [Specialized health education: medical students' preferences and perceptions.]. *Med Clin (Barc)* 2012.

Formatted: Font: Times, 12 pt, Do not check spelling or grammar

Formatted: Font: Times, 12 pt, Italic, Do not check spelling or grammar

Formatted: Font: Times, 12 pt, Do not check spelling or grammar

Specialty choice in times of economic crisis

2012-002051

38. Gonzalez Lopez-Valcarcel B, Barber Perez P, Ortun Rubio V. *¿Por qué los médicos huyen y rehúyen la Medicina de Familia? Datos y claves sobre el problema en busca de soluciones.* In: Ortún V, editor. *La refundación de la Atención Primaria*. Madrid: Springer Healthcare, 2011.

Formatted: Font: Times, 12 pt, Italic, Do not check spelling or grammar

Formatted: Font: Times, 12 pt, Do not check spelling or grammar

39. González López-Valcárcel B, Barber Pérez P. Planificación y formación de profesionales sanitarios, con foco en la atención primaria. Informe SESPAS 2012. *Gaceta Sanitaria*, 2012;published online 27-Jan-2012. doi:10.1016/j.gaceta.2011.07.029.

Formatted: Font: Times, 12 pt, Italic, Do not check spelling or grammar

Formatted: Font: Times, 12 pt, Do not check spelling or grammar

40. Ministerio de Sanidad y Política Social. Orden SAS/2448/2010, de 15 de septiembre, por la que se aprueba la convocatoria de pruebas selectivas 2010 para el acceso en el año 2011, a plazas de formación sanitaria especializada para Médicos... *Boletín Oficial del Estado*, 2010;230(Sec. II.B.):80254-449.

Formatted: Font: Times, 12 pt, Italic, Do not check spelling or grammar

Formatted: Font: Times, 12 pt, Do not check spelling or grammar

41. Servicio Público de Empleo Estatal (SEPE). *Información mensual de mercado de trabajo de titulados universitarios*. Madrid: Feb, 2010.

Formatted: Font: Times, 12 pt, Italic, Do not check spelling or grammar

Formatted: Font: Times, 12 pt, Do not check spelling or grammar

42. Balsells F, Visa L. El recorte en sanidad alcanza las urgencias del hospital de l'Esperança: Salud decidirá antes del 22 de abril los recortes en personal, camas y servicios. *El País*, 2011;1 April.

Formatted: Font: Times, 12 pt, Italic, Do not check spelling or grammar

43. Servicio Público de Empleo Estatal (SEPE). *Información mensual de mercado de trabajo de titulados universitarios*. Madrid: April, 2012.

Formatted: Font: Times, 12 pt, Do not check spelling or grammar

Formatted: Font: Times, 12 pt, Italic, Do not check spelling or grammar

44. Train K. *Discrete Choice Methods With Simulation, 2nd Edition*. New York: Cambridge University Press, 2009.

Formatted: Font: Times, 12 pt, Do not check spelling or grammar

Formatted: Font: Times, 12 pt, Italic, Do not check spelling or grammar

45. Hole AR. Modelling heterogeneity in patients' preferences for the attributes of a general practitioner appointment. *J Health Econ*, 2008;27(4):1078-94.

Formatted: Font: Times, 12 pt, Do not check spelling or grammar

Formatted: Font: Times, 12 pt, Italic, Do not check spelling or grammar

Formatted: Font: Times, 12 pt, Do not check spelling or grammar

January 8, 2013

TRACKED CHANGES VERSION

41

Specialty choice in times of economic crisis

2012-002051

46. Hosmer DW, Hosmer T, Le Cessie S, Lemeshow S. A comparison of goodness-of-fit tests for the logistic regression model. *Stat Med* 1997;16(9):965-80.

**Formatted:** Font: Times, 12 pt, Italic, Do not check spelling or grammar

47. Kongsved SM, Basnov M, Holm-Christensen K, Hjollund NH. Response rate and completeness of questionnaires: a randomized study of Internet versus paper-and-pencil versions. *J Med Internet Res* 2007;9(3):e25.

**Formatted:** Font: Times, 12 pt, Do not check spelling or grammar

48. Compton MT, Frank E, Elon L, Carrera J. Changes in U.S. medical students' specialty interests over the course of medical school. *J Gen Intern Med* 2008;23(7):1095-100.

**Formatted:** Font: Times, 12 pt, Do not check spelling or grammar

49. Kazerooni EA, Blane CE, Schlesinger AE, Vydareny KH. Medical students' attitudes toward radiology: comparison of matriculating and graduating students. *Acad Radiol* 1997;4(8):601-7.

**Formatted:** Font: Times, 12 pt, Italic, Do not check spelling or grammar

**Formatted:** Font: Times, 12 pt, Do not check spelling or grammar

**Formatted:** Font: Times, 12 pt, Italic, Do not check spelling or grammar

**Formatted:** Font: Times, 12 pt, Do not check spelling or grammar

50. West CP, Popkave C, Schultz HJ, Weinberger SE, Kolars JC. Changes in career decisions of internal medicine residents during training. *Ann Intern Med* 2006;145(10):774-9.

**Formatted:** Font: Times, 12 pt, Italic, Do not check spelling or grammar

**Formatted:** Font: Times, 12 pt, Do not check spelling or grammar

51. Leo J. España supera la barrera de los 2.000 médicos en paro. *Redacción Médica* 2012;Jun 4.

**Formatted:** Font: Times, 12 pt, Italic, Do not check spelling or grammar

**Formatted:** Font: Times, 12 pt, Do not check spelling or grammar

52. Sivey P, Scott A, Witt J, Joyce C, Humphreys J. *Why Junior Doctors Don't Want to Become General Practitioners: A Discrete Choice Experiment from the MABEL Longitudinal Study of Doctors*. Melbourne: University of Melbourne, Melbourne Institute Working Paper No. 17/10, 2010.

**Formatted:** Font: Times, 12 pt, Italic, Do not check spelling or grammar

**Formatted:** Font: Times, 12 pt, Do not check spelling or grammar

53. Simoens S, Hurst J. *The supply of physician services in OECD countries*. Paris: OECD Directorate for Employment, Labour and Social Affairs, Health Working Papers No. 21, 2006.

**Formatted:** Font: Times, 12 pt, Italic, Do not check spelling or grammar

**Formatted:** Font: Times, 12 pt, Do not check spelling or grammar

January 8, 2013

TRACKED CHANGES VERSION

42

Specialty choice in times of economic crisis

2012-002051

54. Nicholson S. How Much Do Medical Students Know about Physician Income?

*Journal of Human Resources* 2005;40(1):100-14.

**Formatted:** Font: Times, 12 pt, Italic, Do not check spelling or grammar

55. OECD. 3. Health Workforce: 3.4 Remuneration of doctors (general practitioners and

specialists). *Health at a Glance 2011: OECD Indicators*, 2012:66-67.

**Formatted:** Font: Times, 12 pt, Do not check spelling or grammar

**Formatted:** Font: Times, 12 pt, Italic, Do not check spelling or grammar

56. Ubach C, Scott A, French F, Awramenko M, Needham G. What do hospital

consultants value about their jobs? A discrete choice experiment. *BMJ*

2003;326(7404):1432.

**Formatted:** Font: Times, 12 pt, Do not check spelling or grammar

**Formatted:** Font: Times, 12 pt, Italic, Do not check spelling or grammar

**Formatted:** Font: Times, 12 pt, Do not check spelling or grammar

57. Scott A. Eliciting GPs' preferences for pecuniary and non-pecuniary job

characteristics. *J Health Econ* 2001;20(3):329-47.

**Formatted:** Font: Times, 12 pt, Italic, Do not check spelling or grammar

58. Gunther OH, Kurstein B, Riedel-Heller SG, Konig HH. The role of monetary and

nonmonetary incentives on the choice of practice establishment: a stated preference

study of young physicians in Germany. *Health Serv Res* 2010;45(1):212-29.

**Formatted:** Font: Times, 12 pt, Do not check spelling or grammar

**Formatted:** Font: Times, 12 pt, Italic, Do not check spelling or grammar

59. Sevillano EG. Los médicos denuncian que la jornada de 37,5 horas les ha restado

nómina. *El País* 2012;25 April.

**Formatted:** Font: Times, 12 pt, Do not check spelling or grammar

**Formatted:** Font: Times, 12 pt, Italic, Do not check spelling or grammar

60. Blasco P. Los médicos denuncian que, además de ampliar su horario, pierden sueldo.

*El Mundo* 2012;23-Apr.

**Formatted:** Font: Times, 12 pt, Do not check spelling or grammar

**Formatted:** Font: Times, 12 pt, Italic, Do not check spelling or grammar

**Formatted:** Font: Times, 12 pt, Do not check spelling or grammar

1. Schwartz RW, Haley JV, Williams C, Jarecky RK, Strodel WE, Young B, et al. The

controllable lifestyle factor and students' attitudes about specialty selection. *Acad*

*Med* 1990;65(3):207-10.

**Formatted:** Indent: Left: 0", Hanging: 0.25", Line spacing: Double

2. Kassler WJ, Wartman SA, Silliman RA. Why medical students choose primary care

careers. *Acad Med* 1991;66(1):41-3.

January 8, 2013

TRACKED CHANGES VERSION

43

3. Hurley JE. Physicians' Choices of Specialty, Location, and Mode: A Reexamination within an Interdependent Decision Framework. *Journal of Human Resources* 1991;26(1):47-71.
4. Fincher RM, Lewis LA, Rogers LQ. Classification model that predicts medical students' choices of primary care or non-primary care specialties. *Acad Med* 1992;67(5):324-7.
5. Osborn EH. Factors influencing students' choices of primary care or other specialties. *Acad Med* 1993;68(7):572-4.
6. Rosenthal MP, Diamond JJ, Rabinowitz HK, Bauer LC, Jones RL, Kears GW, et al. Influence of income, hours worked, and loan repayment on medical students' decision to pursue a primary care career. *JAMA* 1994;271(12):914-7.
7. Burack JH, Irby DM, Carline JD, Ambrozy DM, Ellsbury KE, Stritter FT. A study of medical students' specialty-choice pathways: trying on possible selves. *Acad Med* 1997;72(6):534-41.
8. Thornton J. Physician choice of medical specialty: do economic incentives matter? *Applied Economics* 2000;32(11):1419-28.
9. Gelfand DV, Podnos YD, Wilson SE, Cooke J, Williams RA. Choosing general surgery: insights into career choices of current medical students. *Arch Surg* 2002;137(8):941-5; discussion 45-7.
10. Nicholson S. Physician Specialty Choice under Uncertainty. *Journal of Labor Economics* 2002;20(4):816-47.
11. Dorsey ER, Jarjoura D, Rutecki GW. Influence of controllable lifestyle on recent trends in specialty choice by US medical students. *JAMA* 2003;290(9):1173-8.



12. Thornton J, Esposito F. How important are economic factors in choice of medical specialty? *Health Econ* 2003;12(1):67-73.
13. Azizzadeh A, McCollum CH, Miller CC, 3rd, Holliday KM, Shilstone HC, Lucci A, Jr. Factors influencing career choice among medical students interested in surgery. *Curr Surg* 2003;60(2):210-3.
14. Wright B, Scott I, Woloschuk W, Brenneis F, Bradley J. Career choice of new medical students at three Canadian universities: family medicine versus specialty medicine. *CMAJ* 2004;170(13):1920-4.
15. Harris MG, Gavel PH, Young JR. Factors influencing the choice of specialty of Australian medical graduates. *Med J Aust* 2005;183(6):295-300.
16. Cochran A, Melby S, Neumayer LA. An Internet-based survey of factors influencing medical student selection of a general surgery career. *Am J Surg* 2005;189(6):742-6.
17. Gagne R, Leger PT. Determinants of physicians' decisions to specialize. *Health Econ* 2005;14(7):721-35.
18. Kutob RM, Senf JH, Campos-Outcalt D. The diverse functions of role models across primary care specialties. *Fam Med* 2006;38(4):244-51.
19. Sanfey HA, Saalwachter-Schulman AR, Nyhof-Young JM, Eidelson B, Mann BD. Influences on medical student career choice: gender or generation? *Arch Surg* 2006;141(11):1086-94; discussion 94.
20. Lambert TW, Goldacre MJ, Turner G. Career choices of United Kingdom medical graduates of 2002: questionnaire survey. *Med Educ* 2006;40(6):514-21.
21. Horn L, Tzanetos K, Thorpe K, Straus SE. Factors associated with the subspecialty choices of internal medicine residents in Canada. *BMC Med Educ* 2008;8:37.

22. Hauer KE, Durning SJ, Kernan WN, Fagan MJ, Mintz M, O'Sullivan PS, et al. Factors associated with medical students' career choices regarding internal medicine. *JAMA* 2008;300(10):1154-64.
23. Scott IM, Matejcek AN, Gowans MC, Wright BJ, Brenneis FR. Choosing a career in surgery: factors that influence Canadian medical students' interest in pursuing a surgical career. *Can J Surg* 2008;51(5):371-7.
24. West CP, Drefahl MM, Popkave C, Kolars JC. Internal medicine resident self-report of factors associated with career decisions. *J Gen Intern Med* 2009;24(8):946-9.
25. Sivey P, Scott A, Witt J, Joyce C, Humphreys J. *Why Junior Doctors Don't Want to Become General Practitioners: A Discrete Choice Experiment from the MABEL Longitudinal Study of Doctors*. Melbourne: University of Melbourne, Melbourne Institute Working Paper No. 17/10, 2010.
26. Bennett KL, Phillips JP. Finding, recruiting, and sustaining the future primary care physician workforce: a new theoretical model of specialty choice process. *Acad Med* 2010;85(10 Suppl):S81-8.
27. Goldacre MJ, Laxton L, Lambert TW. Medical graduates' early career choices of specialty and their eventual specialty destinations: UK prospective cohort studies. *BMJ* 2010;341:e3199.
28. Lefevre JH, Roupert M, Kerneis S, Karila L. Career choices of medical students: a national survey of 1780 students. *Med Educ* 2010;44(6):603-12.
29. Fukuda Y, Harada T. Gender differences in specialty preference and mismatch with real needs in Japanese medical students. *BMC Med Educ* 2010;10:15.

30. Glynn RW, Kerin MJ. Factors influencing medical students and junior doctors in choosing a career in surgery. *Surgeon* 2010;8(4):187-91.
31. Bindal T, Wall D, Goodyear HM. Medical students' views on selecting paediatrics as a career choice. *Eur J Pediatr* 2011;170(9):1193-9.
32. Heikkilä T, Hyppölä H, Kumpusalo E, Halila H, Vanska J, Kujala S, et al. Choosing a medical specialty—study of Finnish doctors graduating in 1977-2006. *Med Teach* 2011;33(8):e440-5.
33. Gaucher S, Thabut D. [Medical specialty choice: What impact of teaching? Results of a survey of two medical schools.]. *Presse Med* 2012.
34. Gonzalez Lopez Valcareel B, Barber Perez P, Ortun Rubio V. ¿Por qué los médicos huyen y rehúyen la Medicina de Familia? Datos y claves sobre el problema en busca de soluciones. In: Ortún V, editor. *La refundación de la Atención Primaria*. Madrid: Springer Healthcare, 2011.
35. González López Valcárcel B, Barber Pérez P. Planificación y formación de profesionales sanitarios, con foco en la atención primaria. Informe SESPAS 2012. *Gaceta Sanitaria* 2012;published online 27 Jan 2012. doi:10.1016/j.gaceta.2011.07.029.
36. Ministerio de Sanidad y Política Social. Orden SAS/2448/2010, de 15 de septiembre, por la que se aprueba la convocatoria de pruebas selectivas 2010 para el acceso en el año 2011, a plazas de formación sanitaria especializada para Médicos... *Boletín Oficial del Estado* 2010;230(Sec. II.B.):80254-449.
37. Servicio Público de Empleo Estatal (SEPE). *Información mensual de mercado de trabajo de titulados universitarios*. Madrid: Feb, 2010.

38. Balsells F, Visa L. El recorte en sanidad alcanza las urgencias del hospital de l'Esperança: Salud decidirá antes del 22 de abril los recortes en personal, camas y servicios. *El País* 2011;1 April.
39. Servicio Público de Empleo Estatal (SEPE). *Información mensual de mercado de trabajo de titulados universitarios*. Madrid: April, 2012.
40. Train K. *Discrete Choice Methods With Simulation, 2nd Edition*. New York: Cambridge University Press, 2009.
41. Hole AR. Modelling heterogeneity in patients' preferences for the attributes of a general practitioner appointment. *J Health Econ* 2008;27(4):1078-94.
42. Hosmer DW, Hosmer T, Le Cessie S, Lemeshow S. A comparison of goodness-of-fit tests for the logistic regression model. *Stat Med* 1997;16(9):965-80.
43. Compton MT, Frank E, Elon L, Carrera J. Changes in U.S. medical students' specialty interests over the course of medical school. *J Gen Intern Med* 2008;23(7):1095-100.
44. Kazerooni EA, Blane CE, Schlesinger AE, Vydareny KH. Medical students' attitudes toward radiology: comparison of matriculating and graduating students. *Acad Radiol* 1997;4(8):601-7.
45. West CP, Popkave C, Schultz HJ, Weinberger SE, Kolars JC. Changes in career decisions of internal medicine residents during training. *Ann Intern Med* 2006;145(10):774-9.
46. Leo J. España supera la barrera de los 2.000 médicos en paro *Redacción Médica* 2012;Jun 4.

Specialty choice in times of economic crisis

2012-002051

47. Simoens S, Hurst J. *The supply of physician services in OECD countries*. Paris: OECD Directorate for Employment, Labour and Social Affairs, Health Working Papers No. 21, 2006.
48. Nicholson S. How Much Do Medical Students Know about Physician Income? *Journal of Human Resources* 2005;40(1):100-14.
49. OECD. 3. Health Workforce: 3.4 Remuneration of doctors (general practitioners and specialists). *Health at a Glance 2011: OECD Indicators*, 2012:66-67.
50. Ubach C, Scott A, French F, Awramenko M, Needham G. What do hospital consultants value about their jobs? A discrete choice experiment. *BMJ* 2003;326(7404):1432.
51. Scott A. Eliciting GPs' preferences for pecuniary and non-pecuniary job characteristics. *J Health Econ* 2001;20(3):329-47.
52. Gunther OH, Kurstein B, Riedel-Heller SG, König HH. The role of monetary and nonmonetary incentives on the choice of practice establishment: a stated preference study of young physicians in Germany. *Health Serv Res* 2010;45(1):212-29.
53. Sevillano EG. Los médicos denuncian que la jornada de 37,5 horas les ha restado nómina. *El País* 2012;25 April.
54. Blaseo P. Los médicos denuncian que, además de ampliar su horario, pierden sueldo. *El Mundo* 2012;23-Apr.

January 8, 2013

TRACKED CHANGES VERSION

49
